# Supplementary material for: Indium triflate catalysed 3-aza-Cope rearrangement of amino acid derived α,β-unsaturated esters to alkylidene oxindoles
Source: Royal Society of Chemistry journal article supplement (doi:10.1039/c6ob02419j), 2017-01-01
Supplement: c6ob02419j2.pdf [file c6ob02419j2.pdf]

# Indium triflate catalysed 3-aza-Cope rearrangement of Amino acid derived $\alpha,\beta$ -unsaturated esters to the alkylidene oxindoles

Srinivas Lavanya Kumar M,<sup>a</sup> Sudipta Kumar Manna,<sup>a, b</sup> Saroj Maji<sup>a</sup> and Gautam Panda<sup>a, c\*</sup>

<sup>a</sup>*Medicinal and Process Chemistry Division, CSIR-Central Drug Research Institute, BS 10/1, Jankipuram Extension, Sitapur Road, Lucknow 226031, UP, India.*

<sup>b</sup>*Present address: Graduate School of Pharmaceutical Sciences, Graduate School of Science, and Research Center for Materials Science, Nagoya University, Chikusa, Nagoya 464-8601, Japan.*

<sup>c</sup>*Academy of Scientific and Innovative Research (AcSIR), New Delhi 110001, India.*

Fax: (+91)-522-2771941; Phone: (+91)-522-2772450, Ext 4661, 4662

E-mail: [gautam.panda@gmail.com](mailto:gautam.panda@gmail.com); [gautam\\_panda@cdri.res.in](mailto:gautam_panda@cdri.res.in)

## Contents:

1. Spectra of **1a-1n**
2. Spectra of **2a-2n**

## Page No

**2-27**

**28-55**

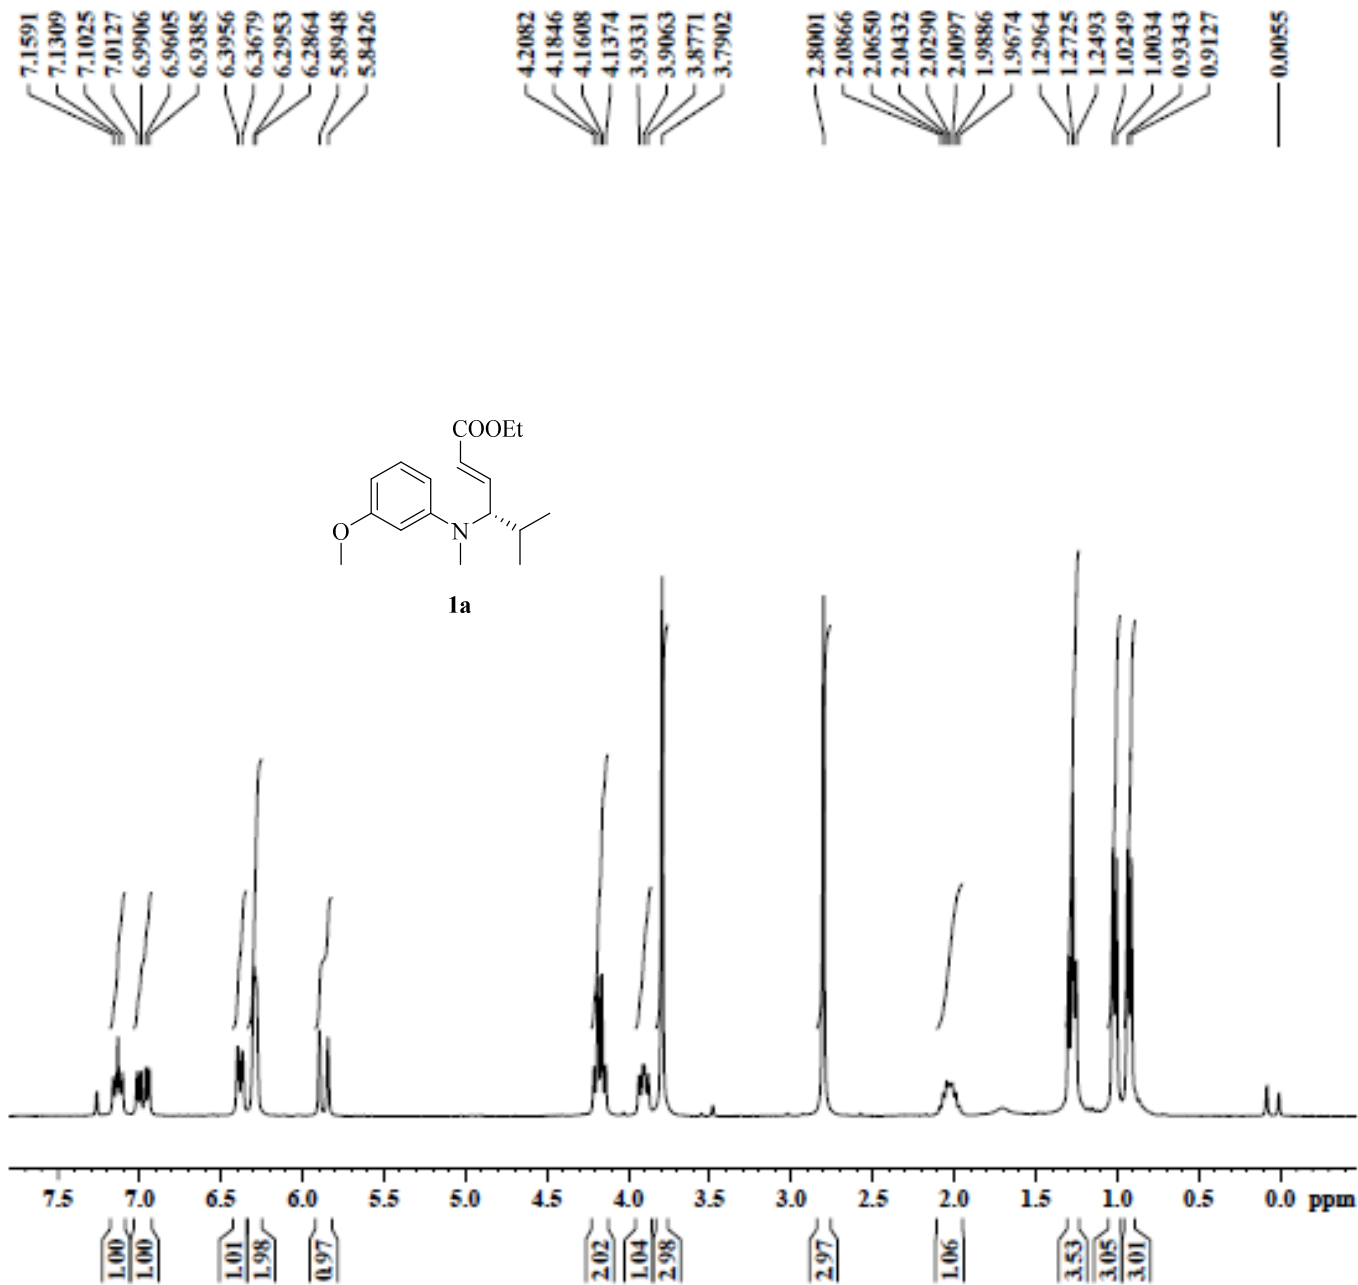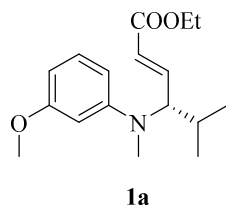

**SKM-515B**  
**1H, CDCl3**

Current Data Parameters  
 NAME SKM-515B, 1H, 300 MHz, 11.3.13.E  
 EXPNO 340  
 PROCNO 1

F2 - Acquisition Parameters  
 Date\_ 20130311  
 Time 3.45  
 INSTRUM spect  
 PROBHD 5 mm QNP 1H/13  
 PULPROG zg30  
 TD 65536  
 SOLVENT CDCl3  
 NS 8  
 DS 2  
 SWH 6188.119 Hz  
 FIDRES 0.094423 Hz  
 AQ 5.2953557 sec  
 RG 64  
 DW 80.800 usec  
 DE 15.00 usec  
 TE 673.2 K  
 D1 1.00000000 sec  
 TD0 1

----- CHANNEL f1 -----  
 NUC1 1H  
 P1 10.00 usec  
 PL1 -1.00 dB  
 PL1W 15.02081871 W  
 SFO1 300.1318534 MHz

F2 - Processing parameters  
 SI 32768  
 SF 300.1300070 MHz  
 WDW EM  
 SSB 0  
 LB 0.30 Hz  
 GB 0  
 PC 1.00

<sup>1</sup>H -NMR Spectrum of **1a**

166.41  
 160.73  
 151.60  
 145.27  
 129.79  
 122.60  
 105.98  
 101.29  
 99.59  
 77.32  
 77.00  
 76.68  
 66.28  
 60.38  
 55.09  
 32.10  
 30.31  
 20.42  
 20.13  
 14.19

SKM-515B  
13C, CDCl3

Current Data Parameters  
NAME SKM-515B, 13C, 400 MHz, 24 June, 2013, E  
EXPNO 80  
PROCNO 1

F2 - Acquisition Parameters  
Date\_ 20130624  
Time 18.41  
INSTRUM spect  
PROBHD 5 mm PABBO DDJ  
PULPROG zgpg30  
TD 65536  
SOLVENT CDCl3  
NS 512  
DS 0  
SWH 24220.481 Hz  
FIDRES 0.366796 Hz  
AQ 1.3621488 sec  
RG 201.40  
DM 20.000 usec  
DE 6.00 usec  
TE 300.0 K  
D1 2.0000000 sec  
D11 0.0300000 sec  
TD0 1

----- CHANNEL f1 -----  
SFO1 100.620440 MHz  
NUC1 13C  
P1 0.20 usec  
PLW1 70.58999947 W

----- CHANNEL f2 -----  
SFO2 400.1621000 MHz  
NUC2 131  
CPDPRG2 waltz16  
PCPD2 90.00 usec  
PLW2 14.00000000 W  
PLW3 0.26341936 W  
PLW4 0.21553000 W

F2 - Processing parameters  
SI 32768  
SF 100.620440 MHz  
WDW EM  
SSB 0  
LB 3.00 Hz  
GB 0  
PC 1.40

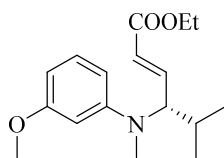

**1a**

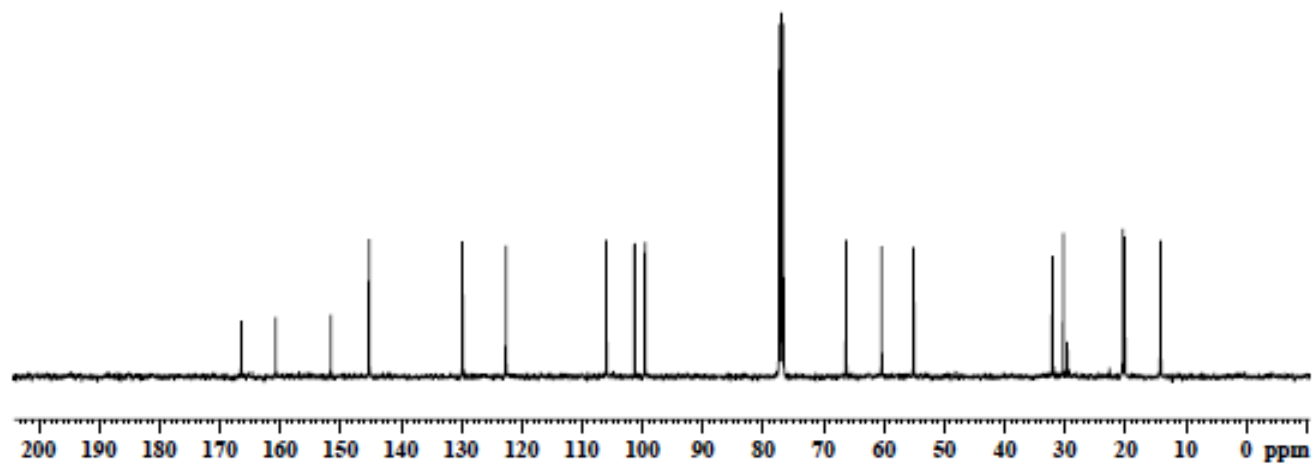

<sup>13</sup>C -NMR Spectrum of **1a**

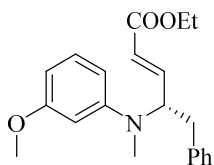

**1b**

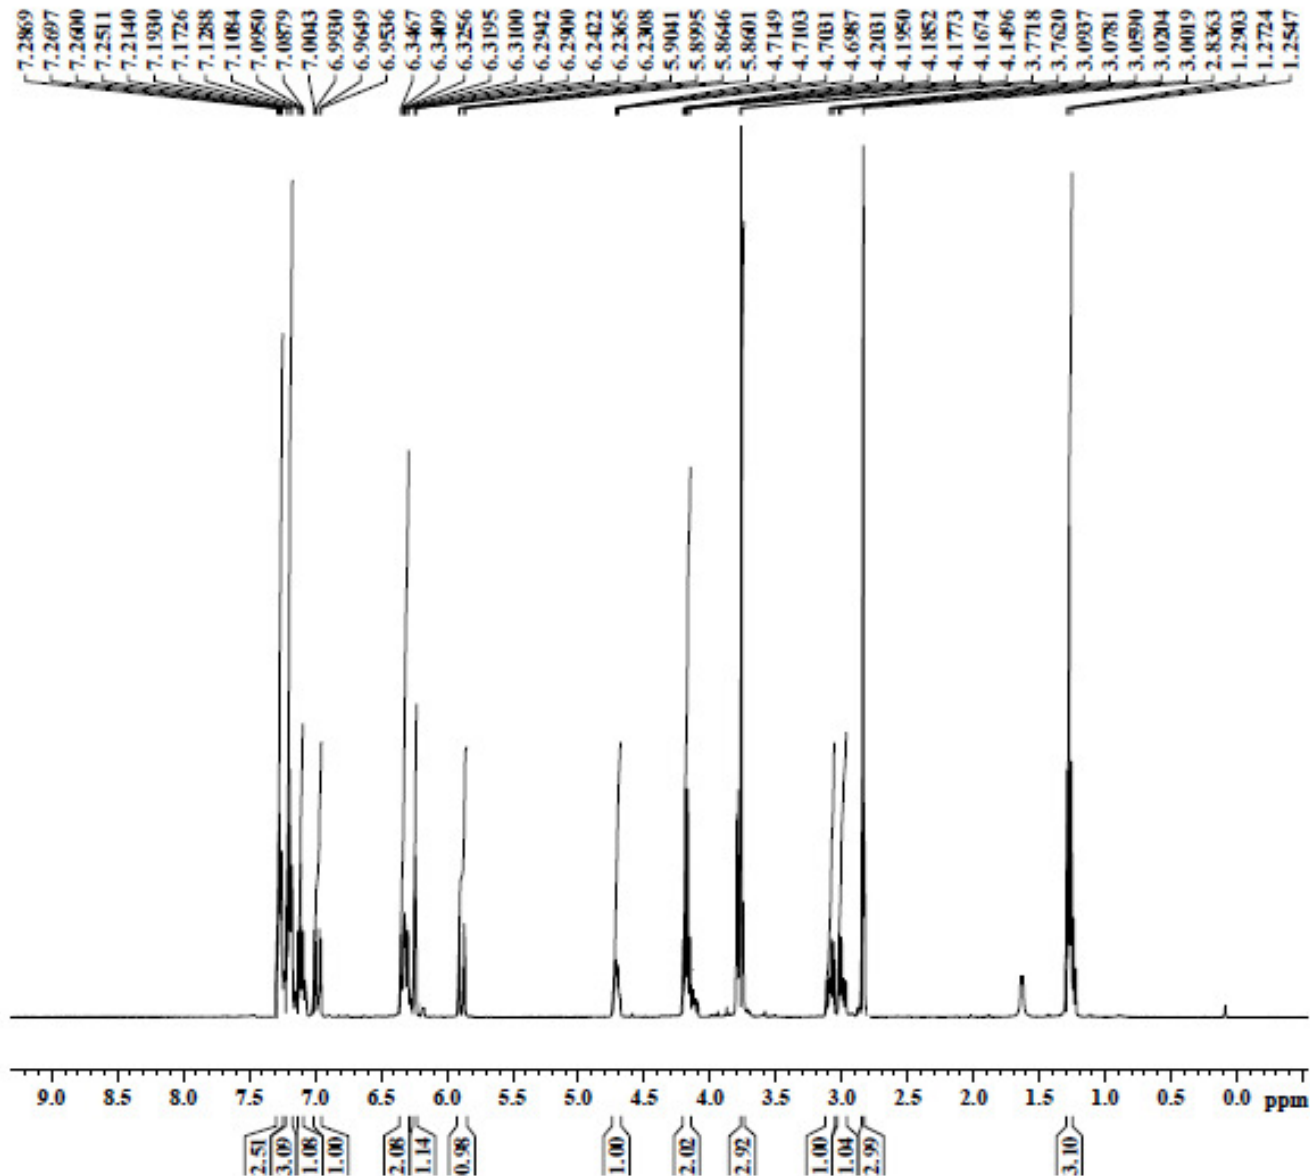

SKM-646C  
1H, CDC13

Current Data Parameters  
NAME SKM-646C,13C,300 MHz,4 Sep.  
EXPNO 10  
PROCNO 1

F2 - Acquisition Parameters  
Date\_ 20130905  
Time 13.32  
INSTRUM spect  
PROBHD 5 mm PABBO BB/  
PULPROG zg30  
TD 65536  
SOLVENT CDC13  
NS 8  
DS 2  
SWH 8012.820 Hz  
FIDRES 0.122266 Hz  
AQ 4.0894465 sec  
RG 65.65  
DW 62.400 usec  
DE 6.50 usec  
TE 299.6 K  
D1 1.00000000 sec  
TD0 1

===== CHANNEL f1 =====  
SFO1 400.1629712 MHz  
NUC1 1H  
P1 12.35 usec  
PLW1 14.00000000 W

F2 - Processing parameters  
SI 65536  
SF 400.1605103 MHz  
WDW EM  
SSB 0  
LB 0.30 Hz  
GB 0  
PC 1.00

<sup>1</sup>H -NMR Spectrum of **1b**

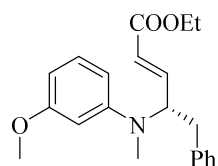

**1b**

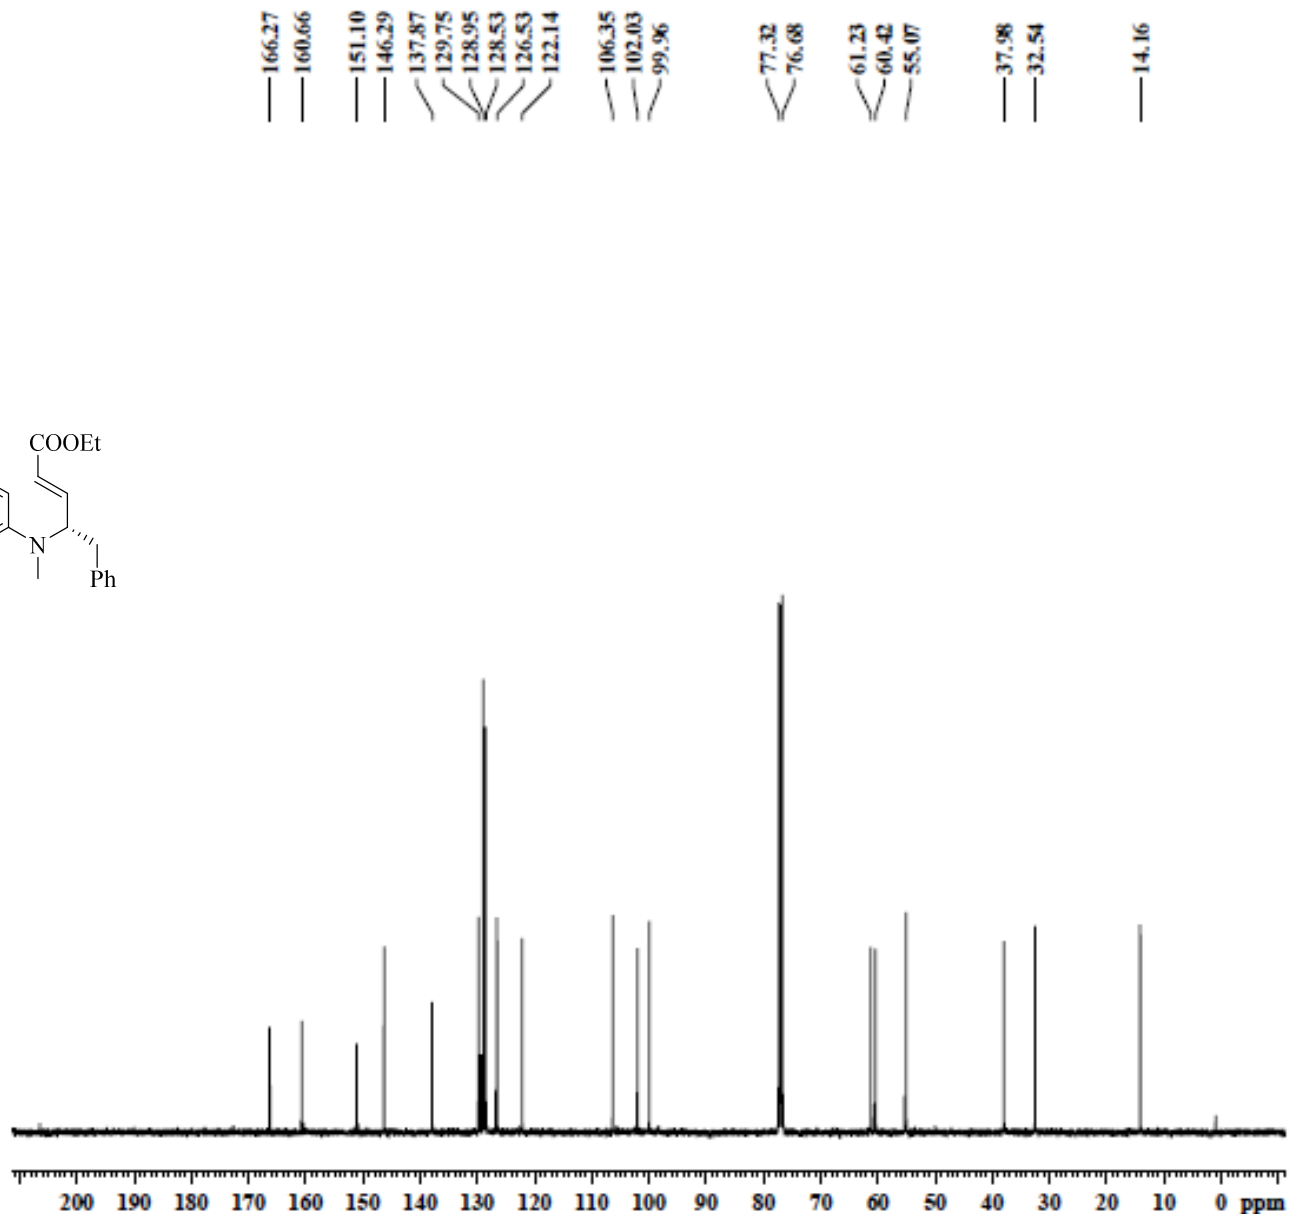

SKM-646 C  
13C, CDC13

Current Data Parameters  
NAME SKM-646C, 13C, 400 MHz, 21 Sep, 2013, E  
EXPNO 20  
PROCNO 1

F2 - Acquisition Parameters  
Date\_ 20130925  
Time 20.57  
INSTRUM spect  
PROSHD 8 mm F4BBO BB1  
PULPROG zgpg30  
TD 65536  
SOLVENT CDCl3  
NS 512  
DS 4  
SWH 24032.461 Hz  
FIDRES 0.366736 Hz  
AQ 1.3631488 sec  
RG 201.60  
DW 20.800 usec  
DE 6.50 usec  
TE 300.2 K  
D1 2.00000000 sec  
D11 0.03000000 sec  
TD0 1

----- CHANNEL f1 -----  
SFO1 100.6304993 MHz  
NUC1 13C  
P1 8.20 usec  
PLW1 70.59999647 W

----- CHANNEL f2 -----  
SFO2 400.1421006 MHz  
NUC2 1H  
CPDPRG2 waltz16  
PCPD2 90.00 usec  
PLW2 14.00000000 W  
PLW12 0.26361999 W  
PLW13 0.21353000 W

F2 - Processing parameters  
SI 32768  
SF 100.6204436 MHz  
WDW EM  
SSB 0  
LB 1.00 Hz  
GB 0  
PC 1.40

$^{13}\text{C}$  -NMR Spectrum of **1b**

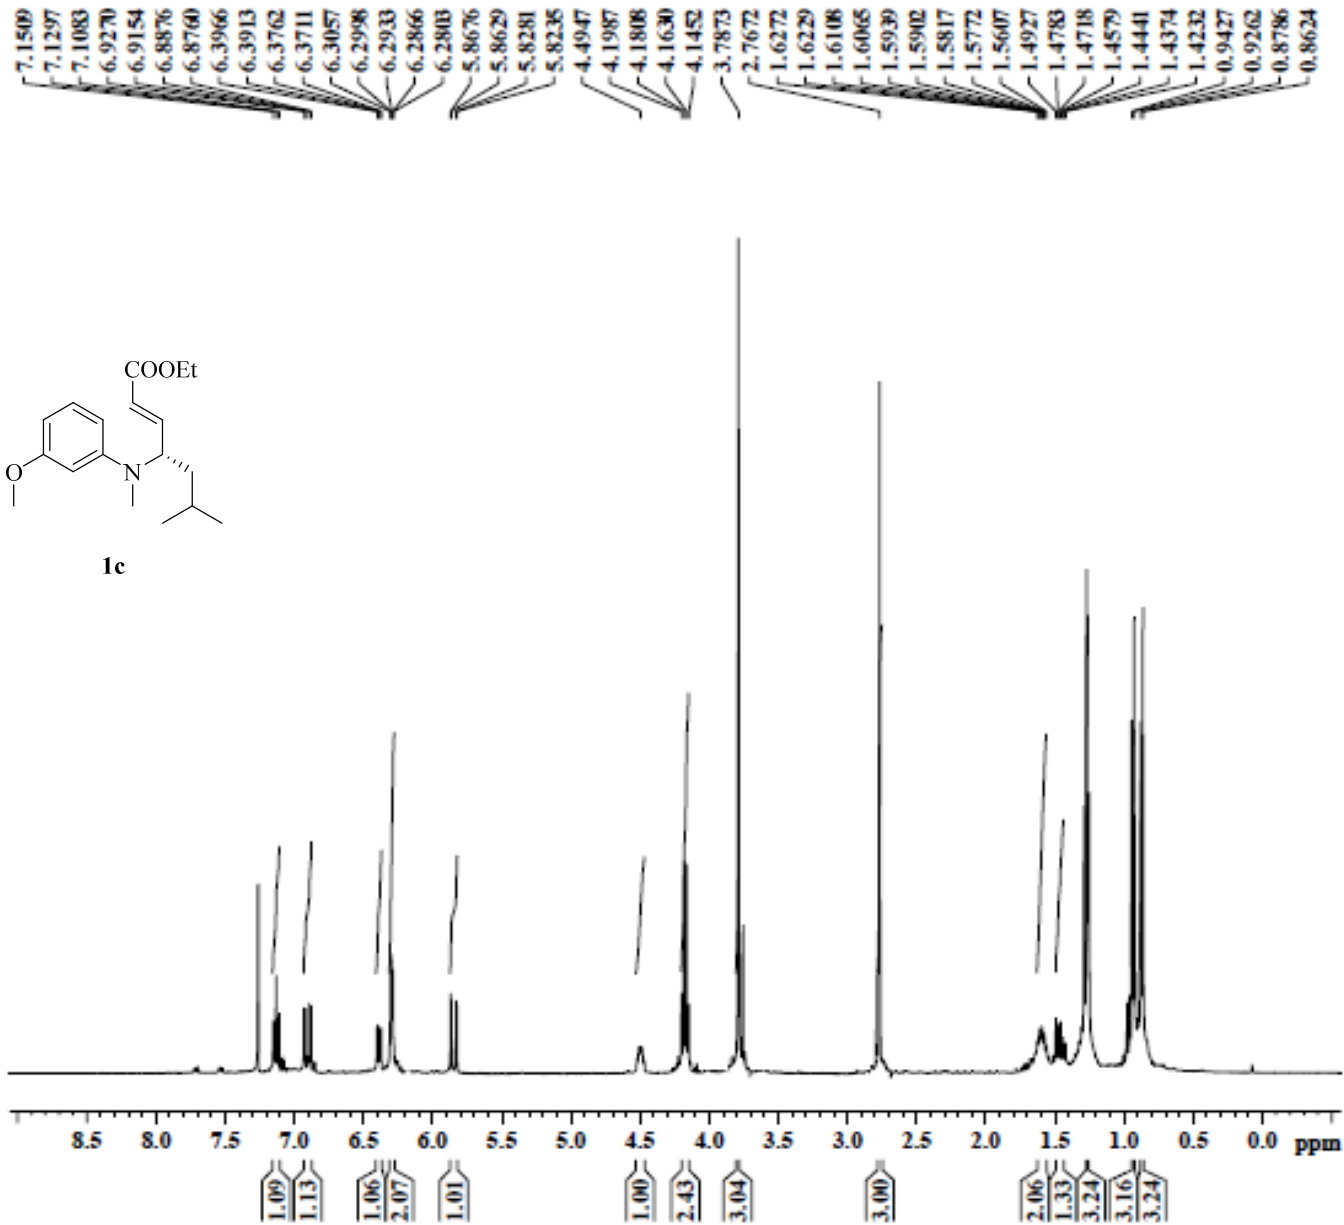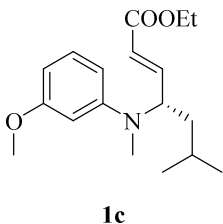

SKM-647 C  
1H, CDCl3

Current Data Parameters  
NAME SKM-647C, 1H, 400 MHz, 5 Sep, 2013, M  
EXPNO 100  
PROCNO 1

F2 - Acquisition Parameters  
Date\_ 20130906  
Time 2.56  
INSTRUM spect  
PROBHD 5 mm PABBO BB  
PULPROG zg30  
TD 65536  
SOLVENT CDCl3  
NS 8  
DS 2  
SWH 8012.820 Hz  
FIDRES 0.122266 Hz  
AQ 4.0894465 sec  
RG 89.7  
DW 82.400 usec  
DE 6.50 usec  
TE 300.0 K  
D1 1.50000000 sec  
TD0 1

----- CHANNEL f1 -----  
SFO1 400.1629712 MHz  
NUC1 1H  
P1 12.38 usec  
PLW1 14.00000000 W

F2 - Processing parameters  
SI 65536  
SF 400.1605104 MHz  
WDW EM  
SSB 0  
LB 0.30 Hz  
GB 0  
PC 1.00

<sup>1</sup>H -NMR Spectrum of **1c**

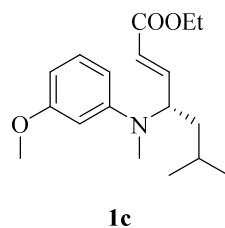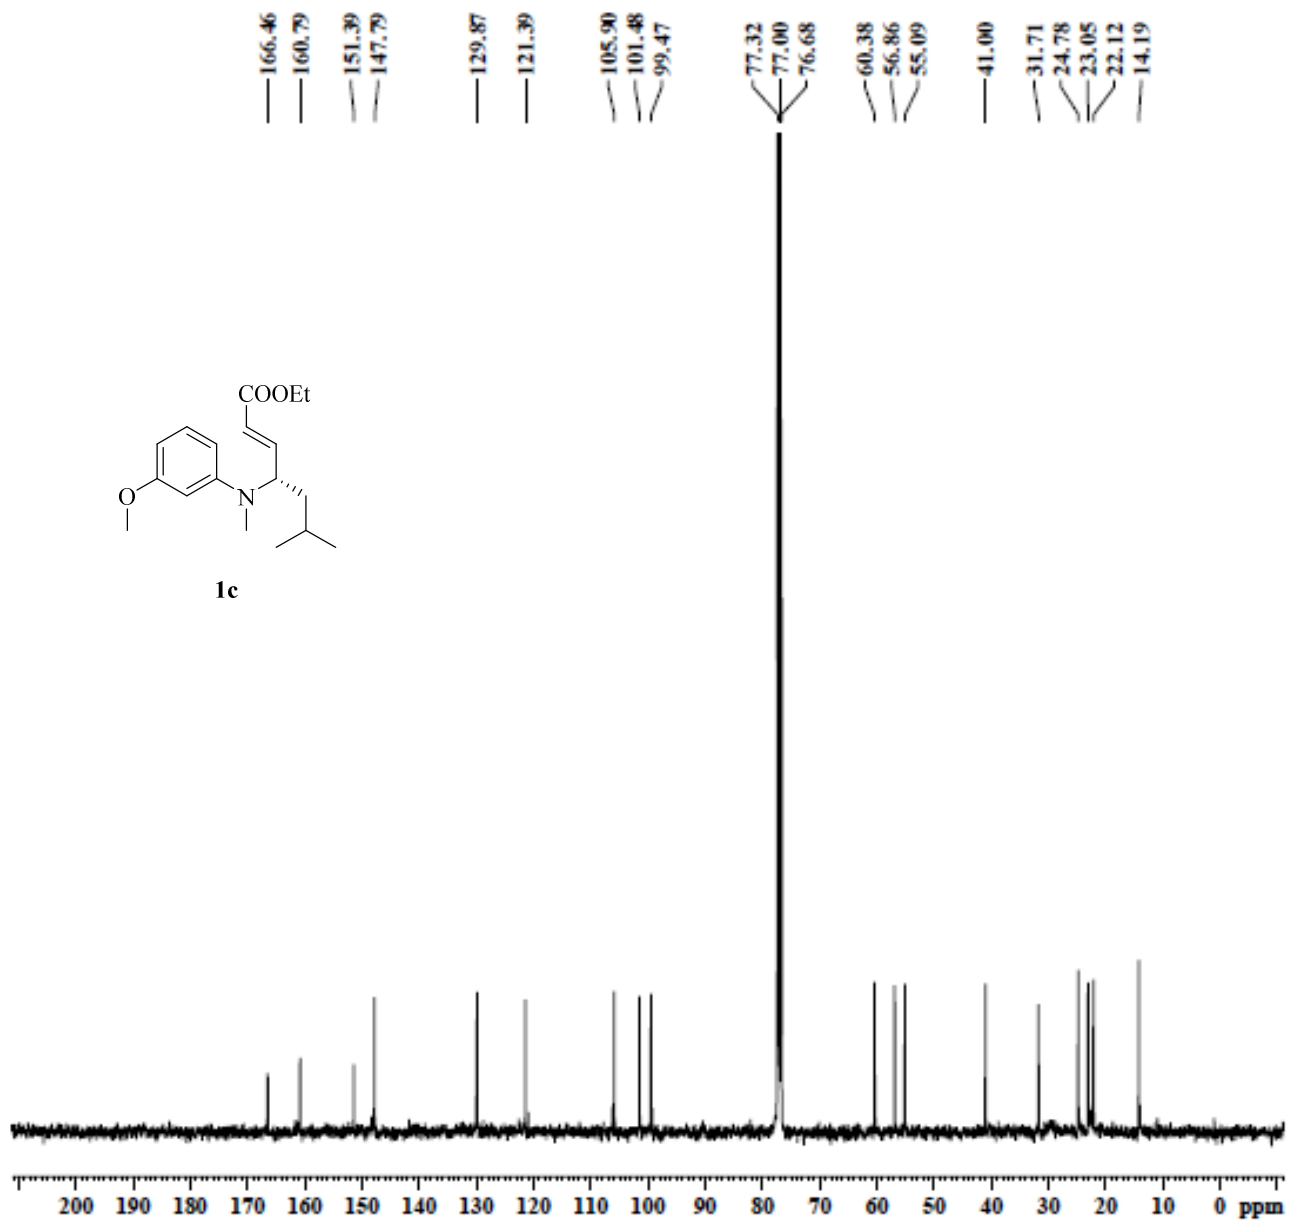

SKM-647 C  
13C, CDCl3

Current Data Parameters  
NAME SKM-647C,13C,400 MHz,16 Sep,2013,M  
EXPNO 20  
PROCNO 1

F2 - Acquisition Parameters  
Date\_ 20130916  
Time 17.07  
INSTRUM spect  
PROBHD 5 mm PABBO BB/  
PULPROG zgpg30  
TD 65536  
SOLVENT CDCl3  
NS 512  
DS 0  
SWH 24038.461 Hz  
FIDRES 0.366798 Hz  
AQ 1.3631488 sec  
RG 201.48  
DW 20.800 usec  
DE 6.80 usec  
TE 300.2 K  
D1 2.0000000 sec  
D11 0.0300000 sec  
TD0 1

----- CHANNEL f1 -----  
SFO1 100.6204993 MHz  
NUC1 13C  
P1 8.20 usec  
PLW1 70.59999647 W

----- CHANNEL f2 -----  
SFO2 400.1621006 MHz  
NUC2 1H  
CPDPRG2 waftz16  
PCPD2 80.00 usec  
PLW2 14.0000000 W  
PLW12 0.26361999 W  
PLW13 0.21353000 W

F2 - Processing parameters  
SI 32768  
SF 100.6204411 MHz  
WDW EM  
SSB 0  
LB 3.00 Hz  
GB 0  
PC 1.40

<sup>13</sup>C -NMR Spectrum of **1c**

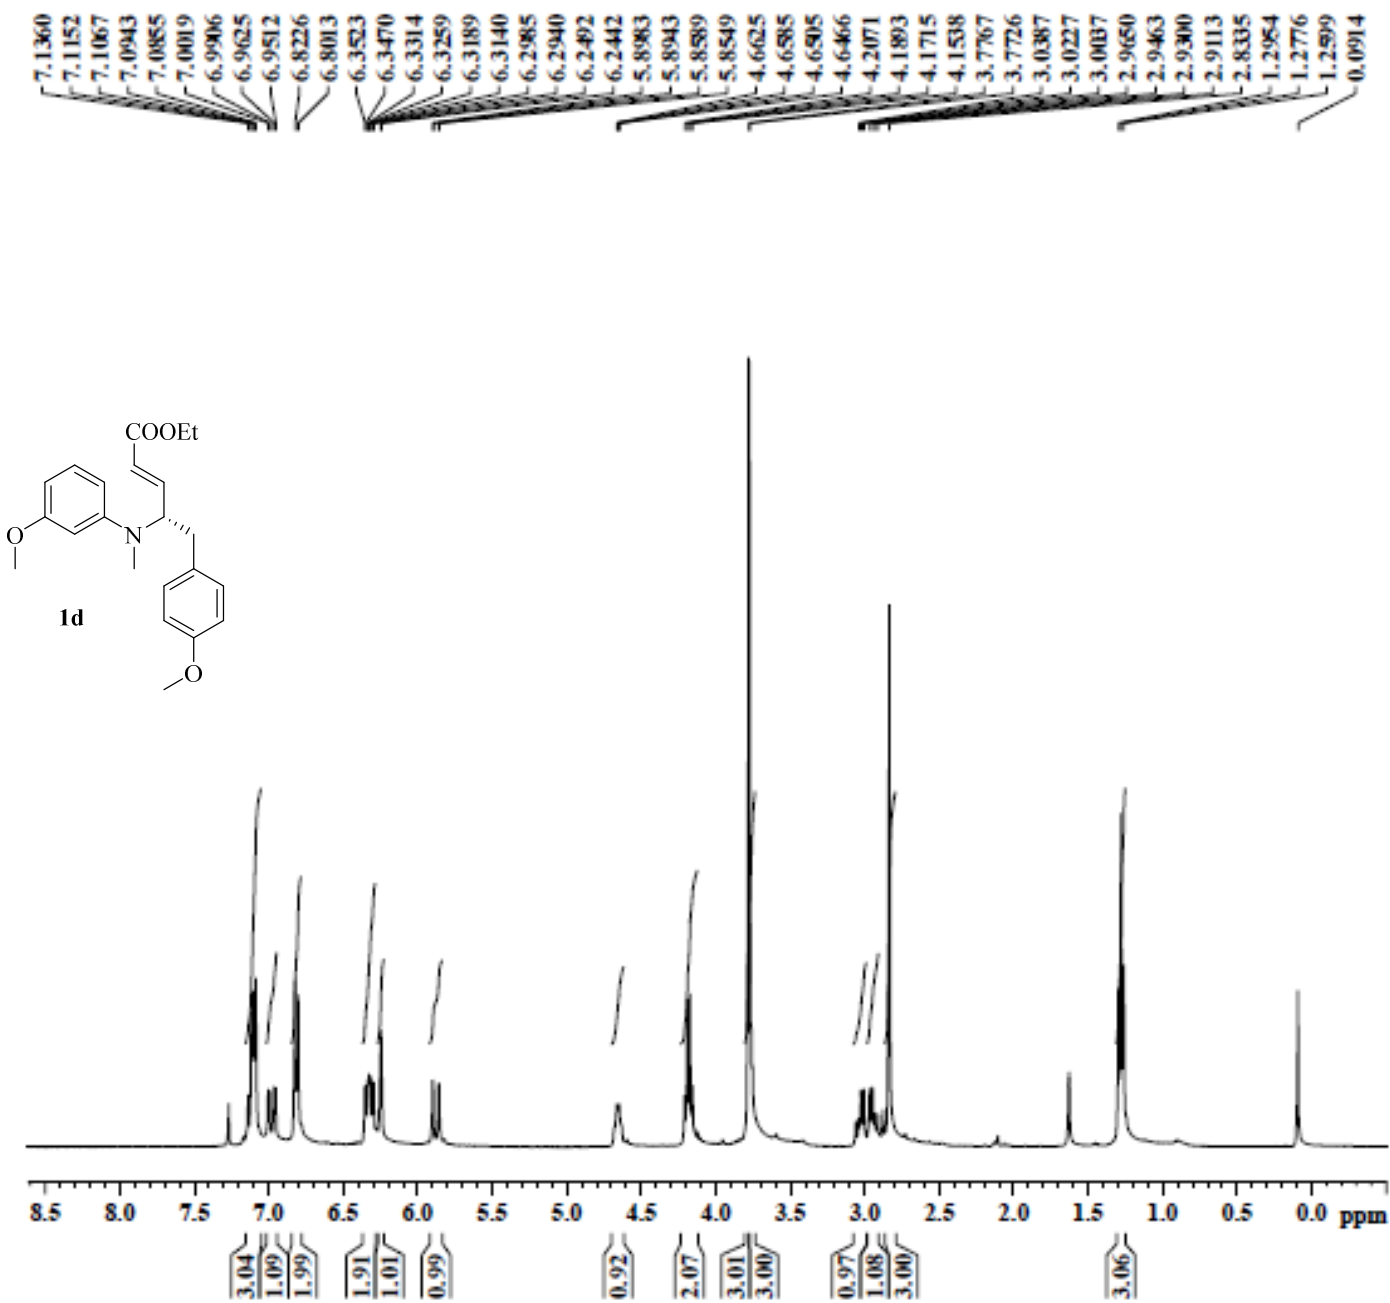

SKM-656A  
1H, CDCl3

Current Data Parameters  
NAME SKM-656A.13C.400 MHz.16 Sep.2013.M  
EXPNO 80  
PROCNO 1

F2 - Acquisition Parameters  
Date\_ 20130916  
Time 14.28  
INSTRUM spect  
PROBHD 5 mm PABBO BB1  
PULPROG zg30  
TD 65536  
SOLVENT CDCl3  
NS 8  
DS 0  
SWH 9615.385 Hz  
FIDRES 0.146719 Hz  
AQ 3.4078720 sec  
RG 58.68  
DW 52.000 usec  
DE 5.50 usec  
TE 300.0 K  
D1 1.00000000 sec  
TD0 1

----- CHANNEL f1 -----  
SFO1 400.1629712 MHz  
NUC1 1H  
P1 12.35 usec  
PLW1 14.00000000 W

F2 - Processing parameters  
SI 65536  
SF 400.1605079 MHz  
WDWV EM  
SSB 0  
LB 0.30 Hz  
GB 0  
PC 1.00

<sup>1</sup>H -NMR Spectrum of **1d**



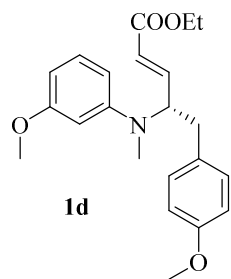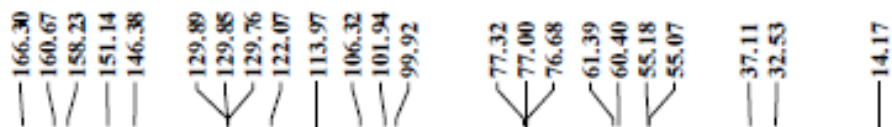

SKM-656 A  
13C, CDCl3

Current Data Parameters  
NAME SKM-656A, 13C, 400 MHz, 24 Sep, 2013, M  
EXPNO 20  
PROCNO 1

F2 - Acquisition Parameters  
Date\_ 20130925  
Time 9.02  
INSTRUM spect  
PROBHD 5 mm PABBO BB/  
PULPROG zgpg30  
TD 65536  
SOLVENT CDCl3  
NS 512  
DS 4  
SWH 24038.461 Hz  
FIDRES 0.388798 Hz  
AQ 1.3831488 sec  
RG 201.48  
DNV 20.800 usec  
DE 8.50 usec  
TE 300.2 K  
D1 2.0000000 sec  
D11 0.0300000 sec  
TD0 1

----- CHANNEL f1 -----  
SFO1 100.6204993 MHz  
NUC1 13C  
P1 8.20 usec  
PLW1 70.59998647 W

----- CHANNEL f2 -----  
SFO2 400.1621006 MHz  
NUC2 1H  
CPOPRG[2] waltz16  
PCPD2 90.00 usec  
PLW2 14.00000000 W  
PLW12 0.26361999 W  
PLW13 0.21383000 W

F2 - Processing parameters  
SI 32768  
SF 100.6204433 MHz  
WDW EM  
SSB 0  
LB 1.00 Hz  
GB 0  
PC 1.40

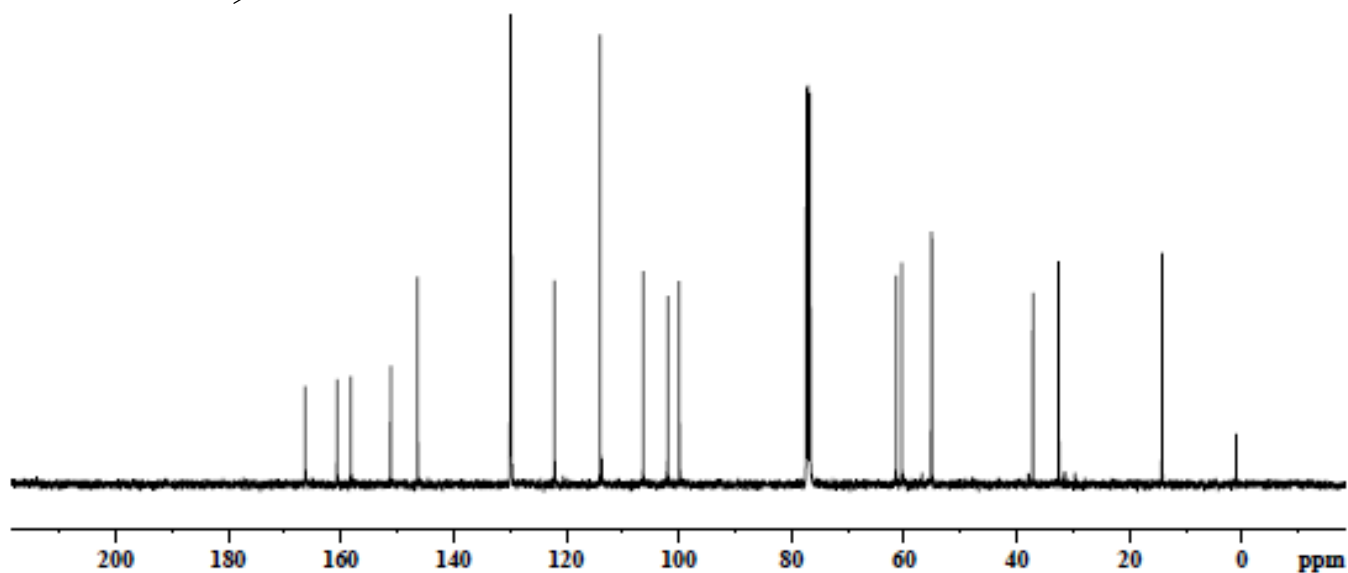

<sup>13</sup>C -NMR Spectrum of **1d**

SKM-662A  
1H, CDCl3

Current Data Parameters  
NAME SKM-662A,1H,400 MHz,20 Sep,2013.E  
EXPNO 50  
PROCNO 1

F2 - Acquisition Parameters  
Date\_ 20130921  
Time 7.11  
INSTRUM spect  
PROBHD 5 mm PABBO BB/  
PULPROG zg30  
TD 65536  
SOLVENT CDCl3  
NS 16  
DS 2  
SWH 8012.820 Hz  
FIDRES 0.122286 Hz  
AQ 4.0894465 sec  
RG 31.99  
DW 62.400 usec  
DE 6.50 usec  
TE 300.2 K  
D1 1.00000000 sec  
TD0 1

\*\*\*\*\* CHANNEL F1 \*\*\*\*\*  
SFO1 400.1629712 MHz  
NUC1 1H  
P1 12.35 usec  
PLW1 14.00000000 W

F2 - Processing parameters  
SI 65536  
SF 400.1605000 MHz  
WDW EM  
SSB 0  
LB 0.30 Hz  
GB 0  
PC 1.00

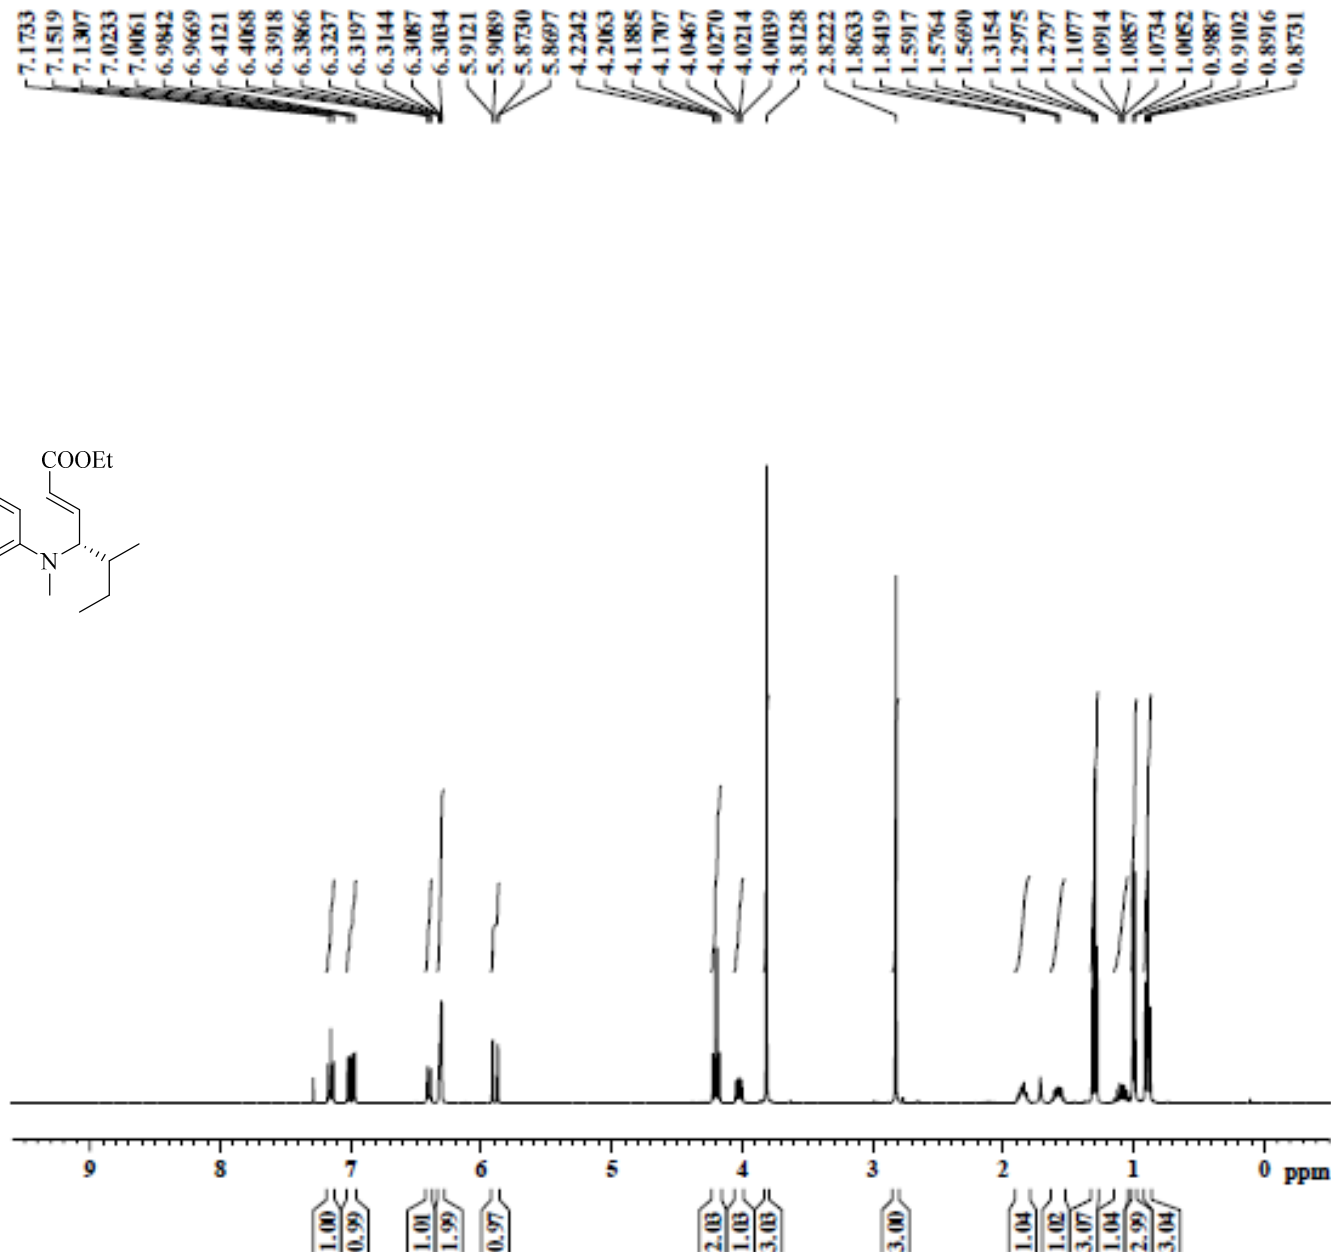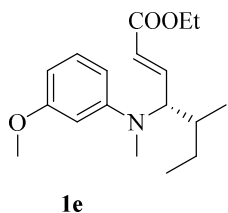

<sup>1</sup>H -NMR Spectrum of **1e**

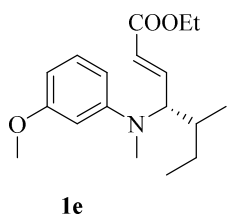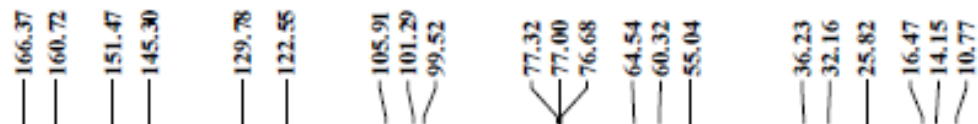

SKM-662 A  
13C, CDC13

Current Data Parameters  
NAME SKM-662A,13C,400 MHz,25 Sep,2013,E  
EXPNO 30  
PROCNO 1

F2 - Acquisition Parameters  
Date\_ 20130926  
Time 23.04  
INSTRUM spect  
PROBHD 5 mm F4BBO BB/  
PULPROG zgpg30  
TD 65536  
SOLVENT CDC13  
NS 512  
DS 4  
SWH 24028.461 Hz  
FIDRES 0.386798 Hz  
AQ 1.3631488 sec  
RG 201.48  
DW 20.500 usec  
DE 6.50 usec  
TE 300.0 K  
D1 2.00000000 sec  
D11 0.03000000 sec  
TD0 1

----- CHANNEL f1 -----  
SFO1 100.620451 MHz  
NUC1 13C  
P1 8.20 usec  
PLW1 70.55998847 W

----- CHANNEL f2 -----  
SFO2 400.1621008 MHz  
NUC2 1H  
CPDPRG2 waltz16  
PCPD2 90.00 usec  
PLW2 14.00000000 W  
PLW12 0.26381999 W  
PLW13 0.21353000 W

F2 - Processing parameters  
SI 32768  
SF 100.6204451 MHz  
WDW EM  
SSB 0  
LB 1.00 Hz  
GB 0  
PC 1.40

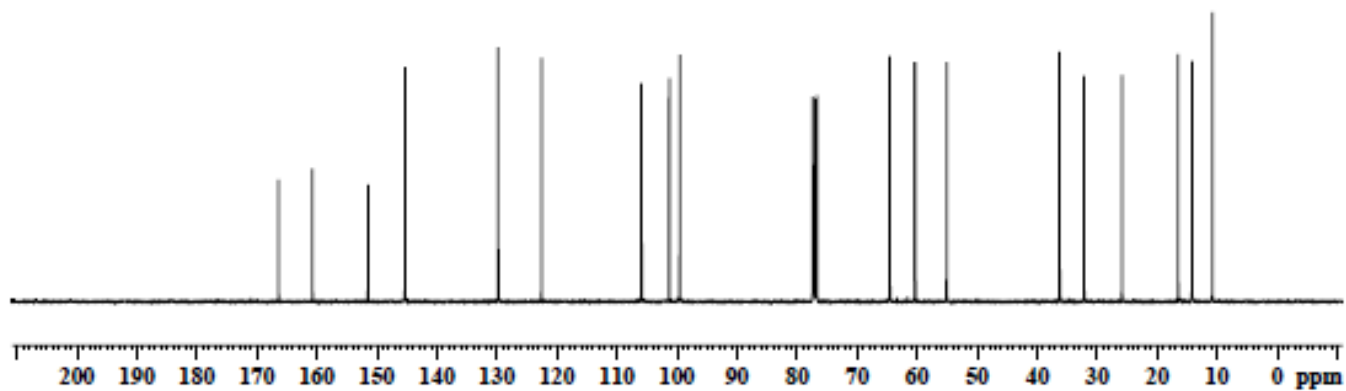

<sup>13</sup>C -NMR Spectrum of **1e**

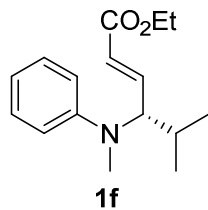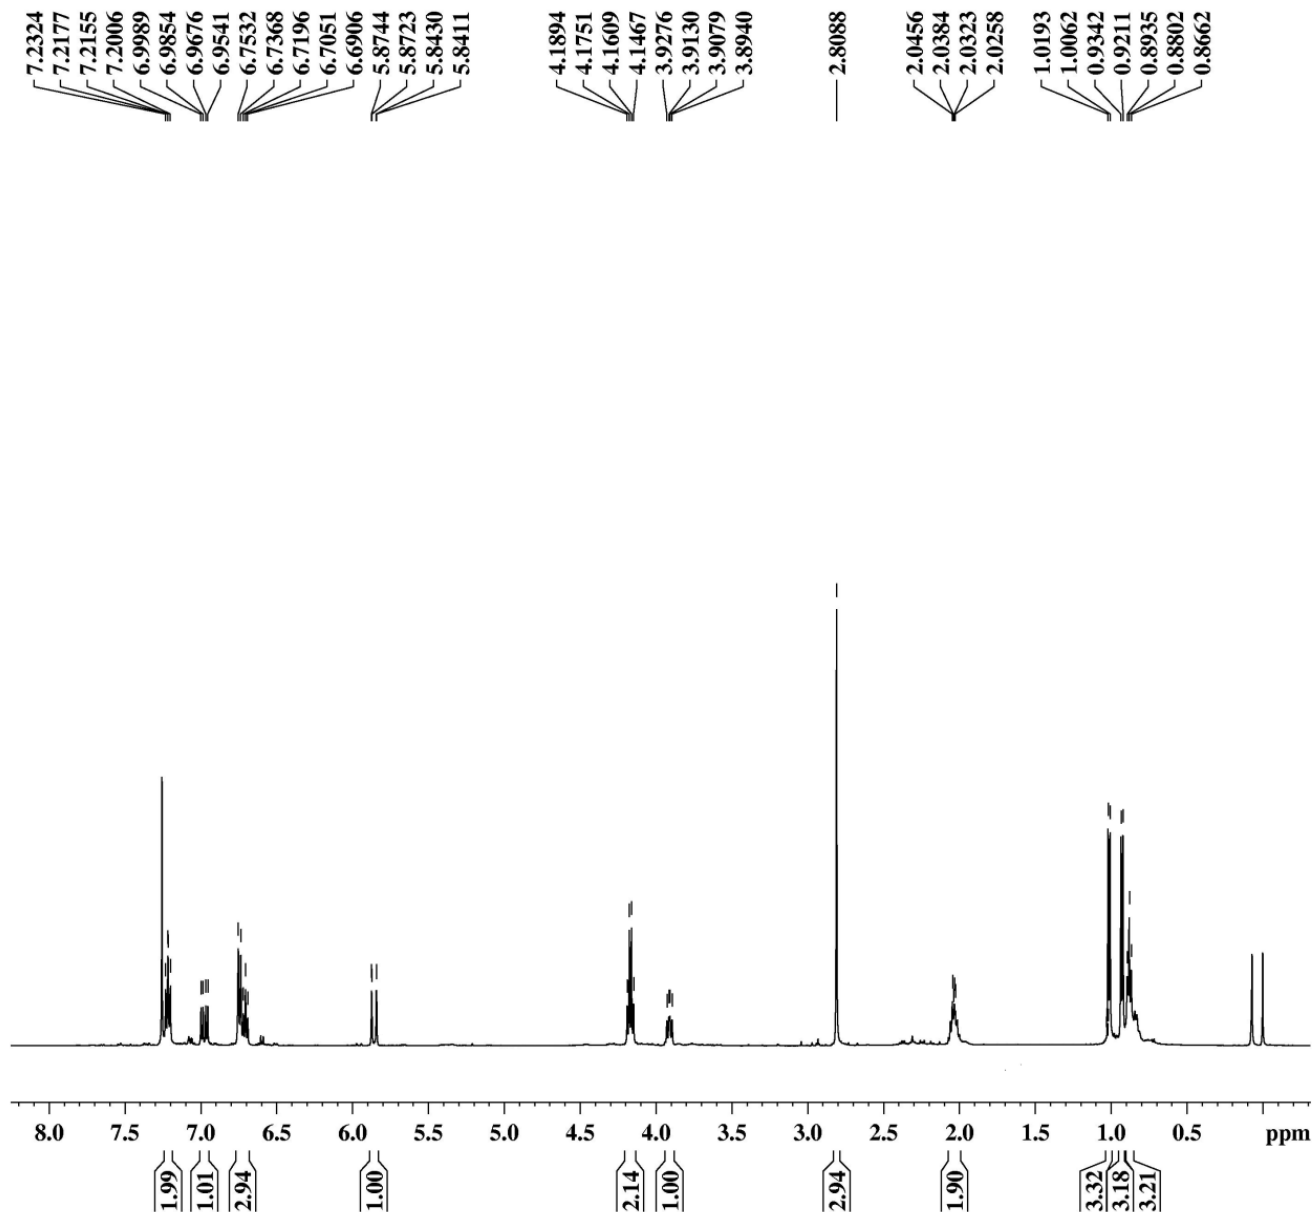

SLK-388W  
1H, CDCl3

Current Data Parameters  
NAME slk-388w  
EXPNO 60  
PROCNO 1

F2 - Acquisition Parameters  
Date\_ 20160502  
Time 10.08  
INSTRUM spect  
PROBHD 5 mm PATXI 1H/  
PULPROG zg30  
TD 65536  
SOLVENT CDCl3  
NS 8  
DS 0  
SWH 10026.738 Hz  
FIDRES 0.152996 Hz  
AQ 3.2680619 sec  
RG 87.95  
DW 49.867 usec  
DE 6.50 usec  
TE 300.0 K  
D1 1.00000000 sec  
TDO 1

===== CHANNEL f1 =====  
SFO1 500.6794419 MHz  
NUC1 1H  
P1 6.45 usec  
PLW1 13.60000038 W

F2 - Processing parameters  
SI 65536  
SF 500.6763640 MHz  
WDW EM  
SSB 0  
LB 0.30 Hz  
GB 0  
PC 1.00

<sup>1</sup>H -NMR Spectrum of **1f**

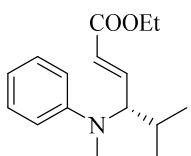

**1f**

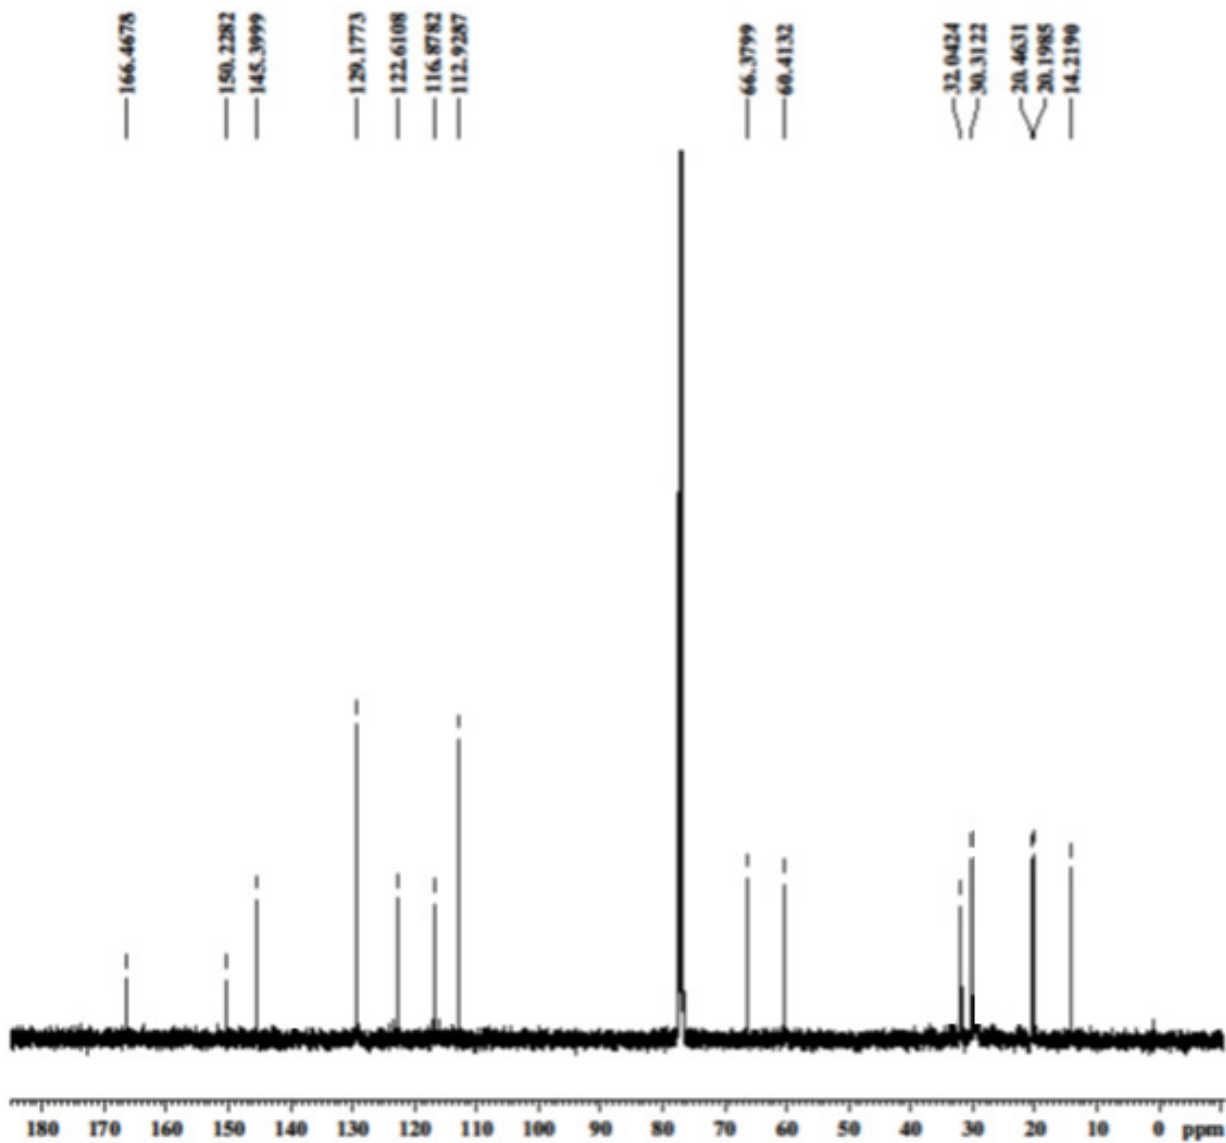

SLK-388W  
13C, CDC13

Current Data Parameters  
NAME slk-388w  
EXPNO 50  
PROCNO 1

F2 - Acquisition Parameters  
Date\_ 20180510  
Time 21.04  
INSTRUM spect  
PROBHD 5 mm PABBO BB  
PULPROG zgpg30  
TD 65536  
SOLVENT CDCl3  
NS 512  
DS 0  
SWH 24038.461 Hz  
FIDRES 0.366798 Hz  
AQ 1.2621488 sec  
RG 201.48  
DW 20.800 usec  
DE 6.50 usec  
TE 300.2 K  
D1 2.0000000 sec  
D11 0.03000000 sec  
TD0 1

===== CHANNEL f1 =====  
SFO1 100.6204380 MHz  
NUC1 13C  
P1 9.00 usec  
PLW1 0.00000000 W

===== CHANNEL f2 =====  
SFO2 400.1621006 MHz  
NUC2 1H  
COPROG2 waltz16  
PCPD2 50.00 usec  
PLW2 13.00000000 W  
PLW12 0.27963000 W  
PLW13 0.22651000 W

F2 - Processing parameters  
SI 32768  
SF 100.6204380 MHz  
WDW EM  
SSB 0  
LB 1.00 Hz  
GB 0  
PC 1.40

<sup>13</sup>C -NMR Spectrum of **1f**

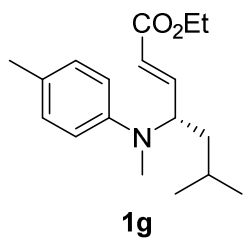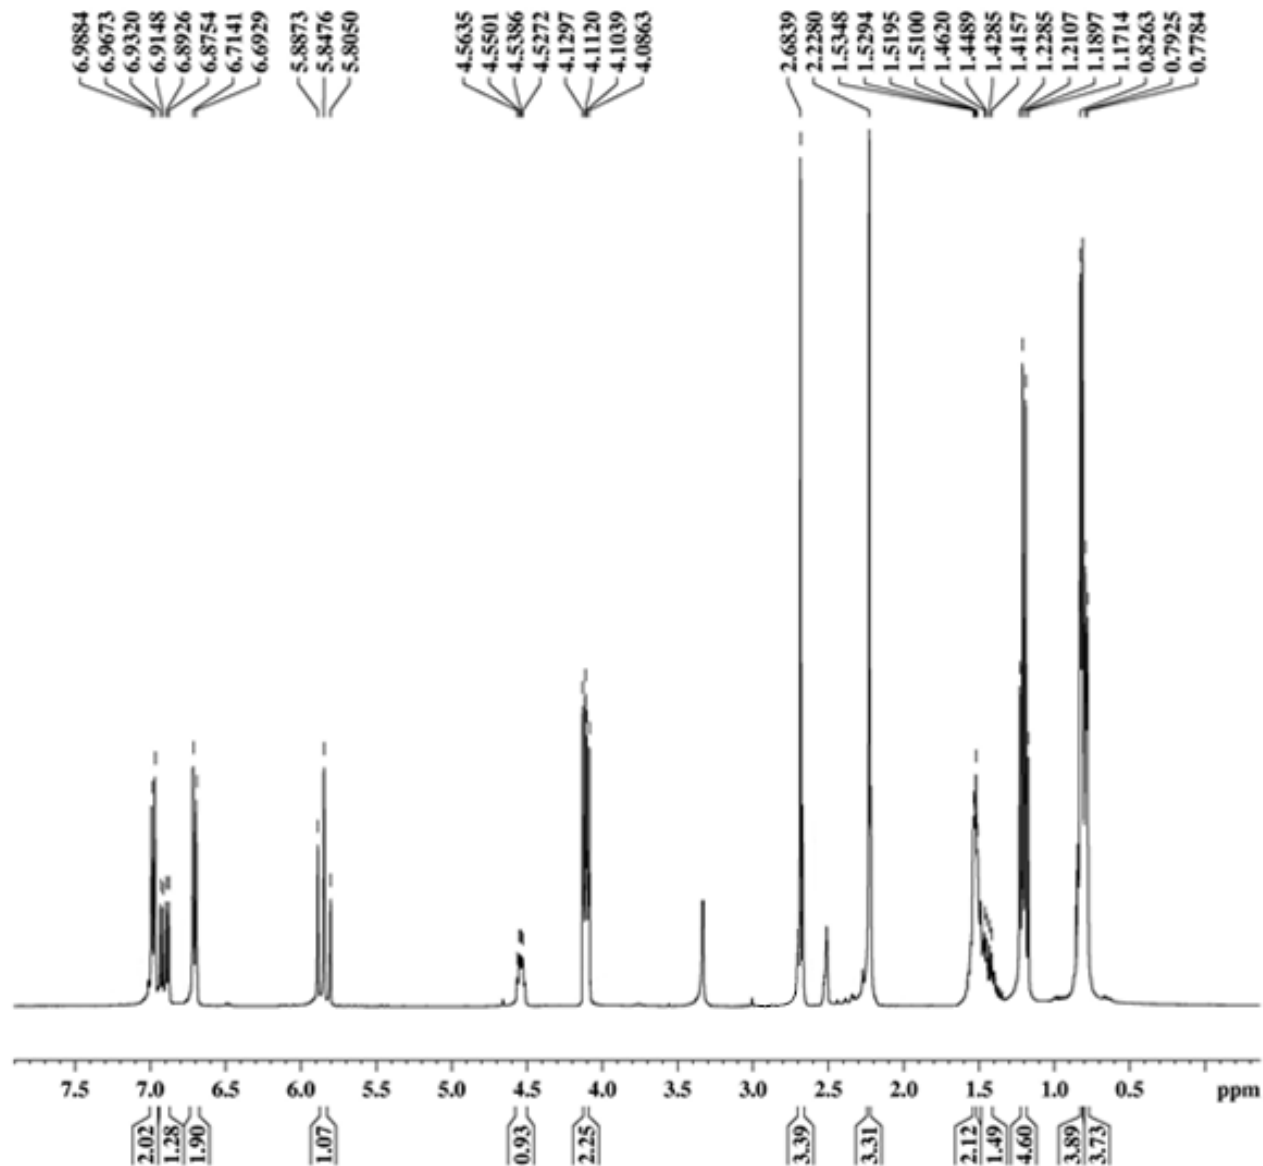

SLK-366W  
1H, DMSO

Current Data Parameters  
NAME slk-366w  
EXPNO 20  
PROCNO 1

F2 - Acquisition Parameters  
Date\_ 20160310  
Time 14.51  
INSTRUM spect  
PROBHD 5 mm PABBO BB/  
PULPROG zg30  
TD 65536  
SOLVENT DMSO  
NS 8  
DS 0  
SWH 9615.385 Hz  
FIDRES 0.146719 Hz  
AQ 3.4078720 sec  
RG 31.99  
DW 52.000 usec  
DE 6.50 usec  
TE 300.0 K  
D1 1.00000000 sec  
TD0 1

===== CHANNEL f1 =====  
SFO1 400.1629712 MHz  
NUC1 1H  
P1 13.20 usec  
PLW1 13.00000000 W

F2 - Processing parameters  
SI 65536  
SF 400.1605000 MHz  
WDW EM  
SSB 0  
LB 0.30 Hz  
GB 0  
PC 1.00

<sup>1</sup>H -NMR Spectrum of **1g**

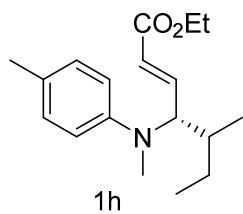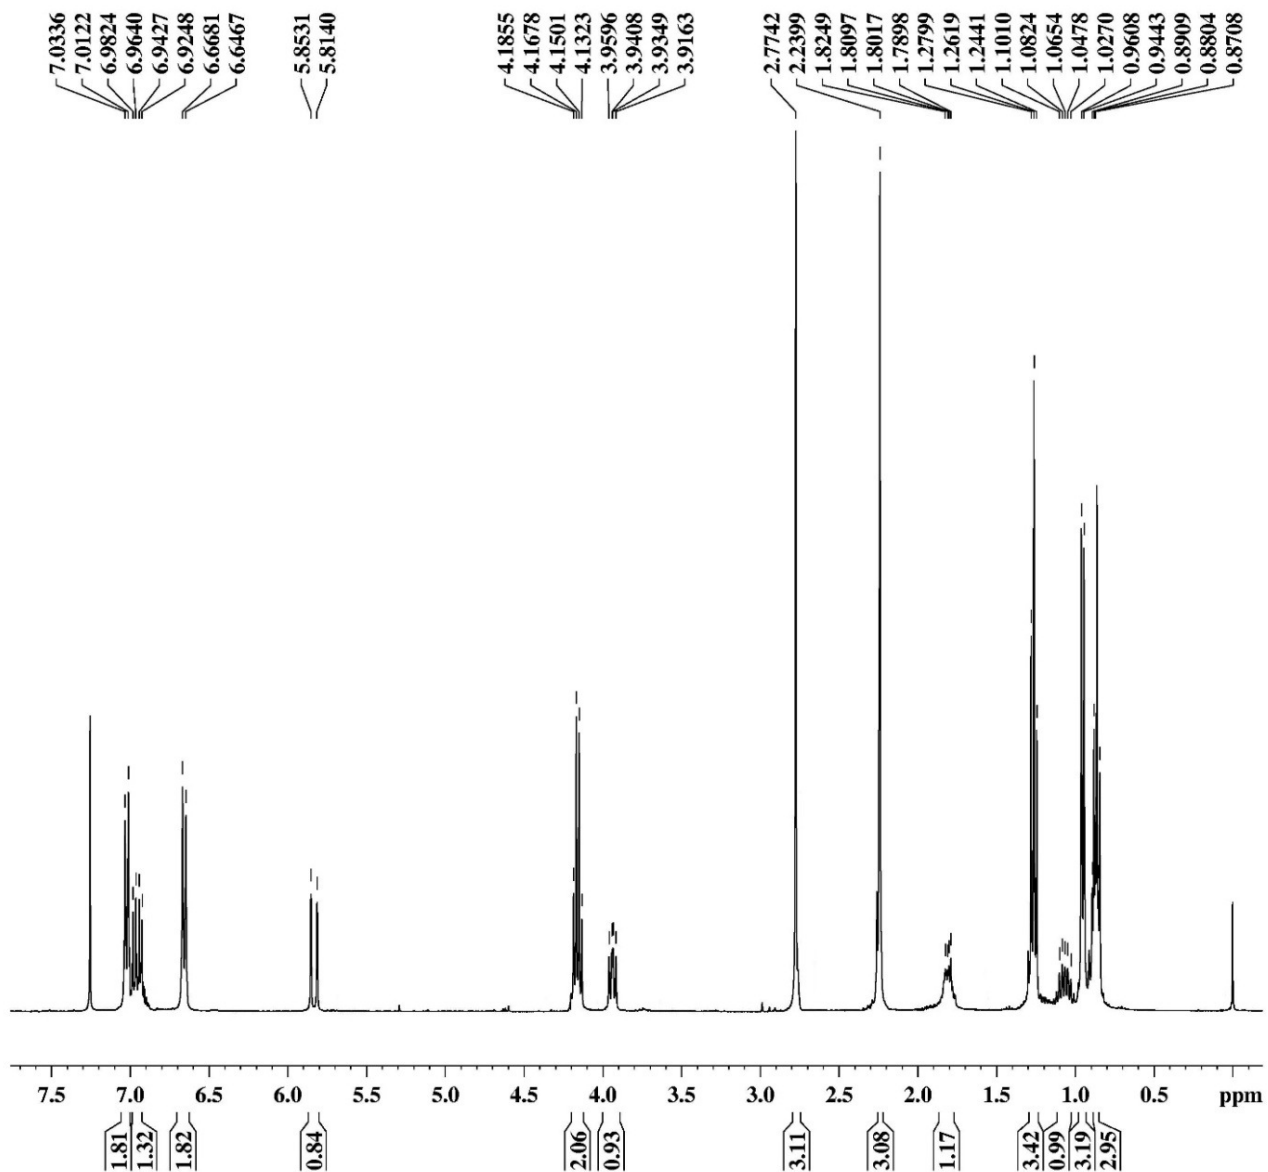

SLK-374w  
1H, CDC13

Current Data Parameters  
NAME slk-374  
EXPNO 130  
PROCNO 1

F2 - Acquisition Parameters  
Date\_ 20160404  
Time 14.57  
INSTRUM spect  
PROBHD 5 mm PABBO BB/  
PULPROG zg30  
TD 65536  
SOLVENT CDCl3  
NS 8  
DS 0  
SWH 9615.385 Hz  
FIDRES 0.146719 Hz  
AQ 3.4078720 sec  
RG 73.53  
DW 52.000 usec  
DE 6.50 usec  
TE 300.0 K  
D1 1.00000000 sec  
TD0 1

===== CHANNEL f1 =====  
SFO1 400.1629712 MHz  
NUC1 1H  
P1 13.20 usec  
PLW1 13.00000000 W

F2 - Processing parameters  
SI 65536  
SF 400.1605117 MHz  
WDW EM  
SSB 0  
LB 0.30 Hz  
GB 0  
PC 1.00

<sup>1</sup>H -NMR Spectrum of **1h**

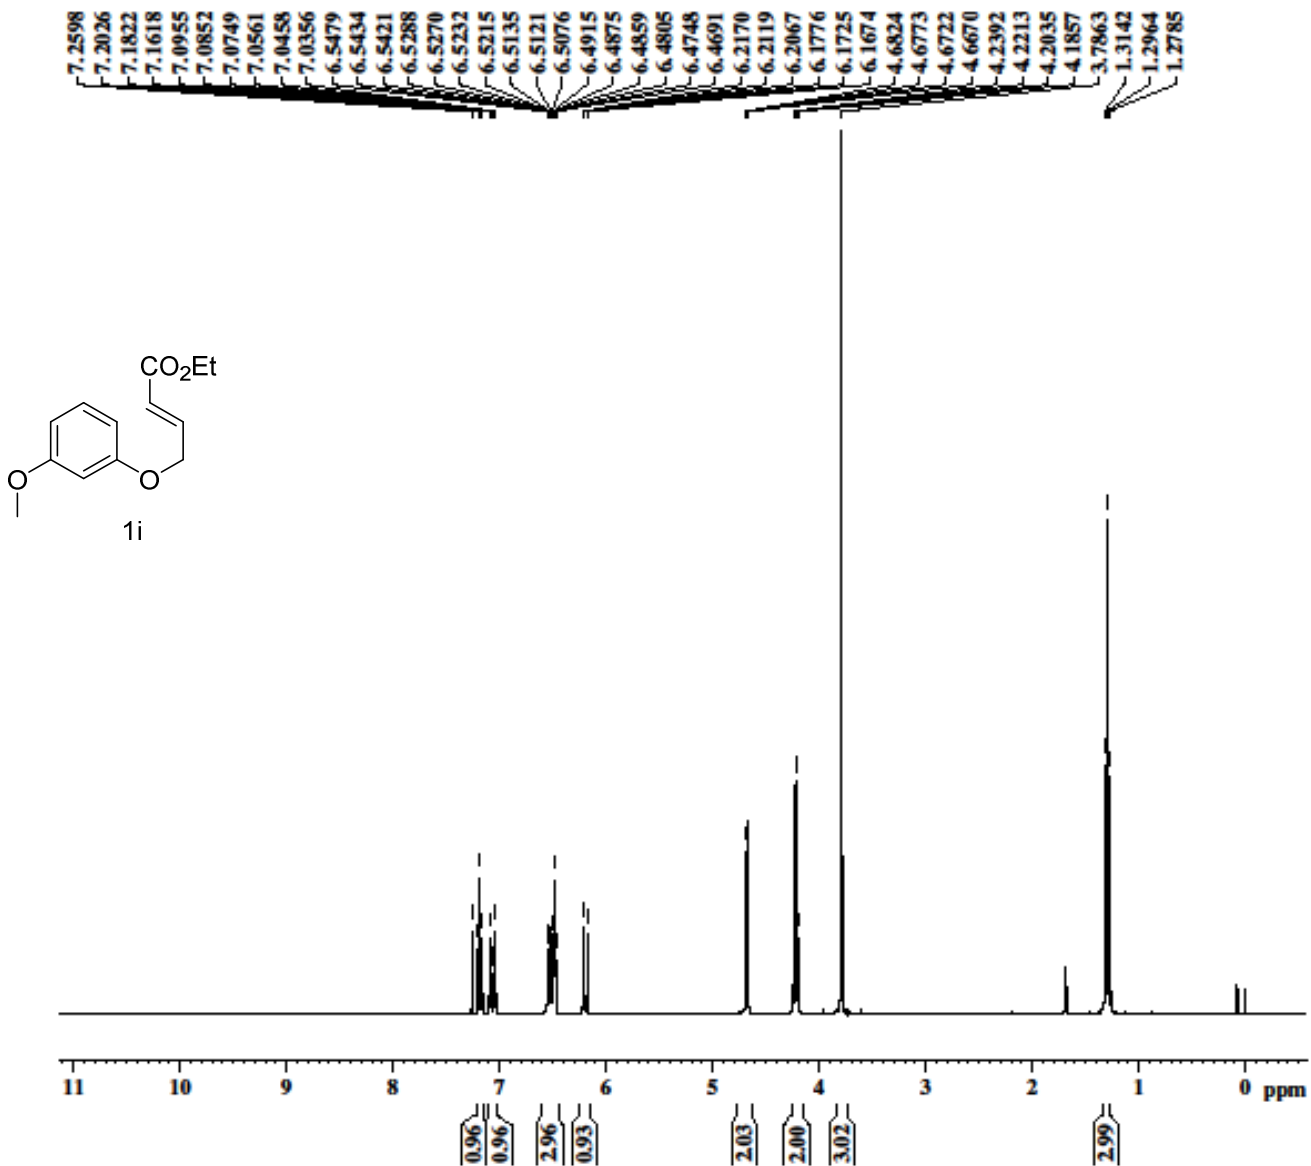

SLK-399  
1H, CDC13

Current Data Parameters  
NAME submission  
EXPNO 50  
PROCNO 1

F2 - Acquisition Parameters  
Date\_ 20180801  
Time 14.02  
INSTRUM spect  
PROBHD 5 mm PABBO BBI  
PULPROG zg30  
TD 65536  
SOLVENT CDC13  
NS 8  
DS 0  
SWH 9615.385 Hz  
FIDRES 0.146719 Hz  
AQ 3.4078720 sec  
RG 58.68  
DW 52.000 usec  
DE 6.50 usec  
TE 300.0 K  
D1 1.00000000 sec  
TDO 1

===== CHANNEL f1 =====  
SFO1 400.1629712 MHz  
NUC1 1H  
P1 13.20 usec  
PLW1 13.00000000 W

F2 - Processing parameters  
SI 65536  
SF 400.1605099 MHz  
WDW EM  
SSB 0  
LB 0.30 Hz  
GB 0  
PC 1.00

<sup>1</sup>H -NMR Spectrum of **1i**



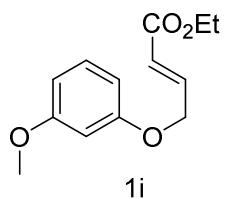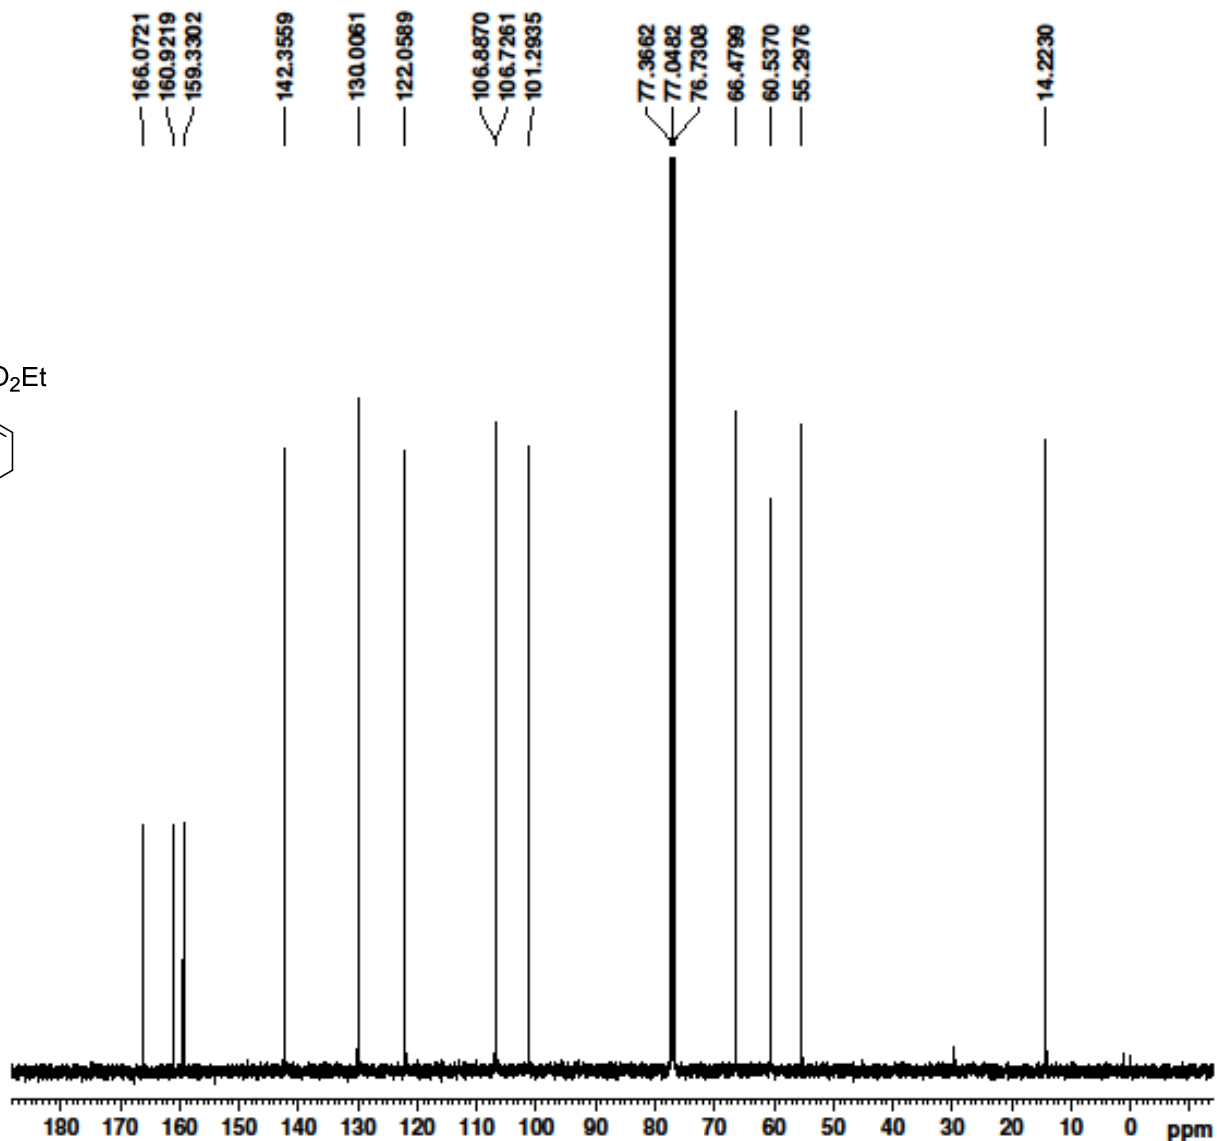

SLK-399  
13C, CDCl3

Current Data Parameters  
NAME submission 13c  
EXPNO 90  
PROCNO 1

F2 - Acquisition Parameters  
Date 20160802  
Time 6.22  
INSTRUM spect  
PROBHD 5 mm PABBO BB  
PULPROG zgpg30  
TD 65536  
SOLVENT CDCl3  
NS 512  
DS 0  
SWH 24038.461 Hz  
FIDRES 0.366798 Hz  
AQ 1.3531488 sec  
RG 201.48  
DW 20.800 usec  
DE 6.50 usec  
TE 300.2 K  
D1 2.0000000 sec  
D11 0.03000000 sec  
TD0 1

==== CHANNEL f1 ====  
SFO1 100.6304993 MHz  
NUC1 13C  
P1 9.90 usec  
PLW1 53.00000000 W

==== CHANNEL f2 ====  
SFO2 400.1621006 MHz  
NUC2 1H  
CPDPRG2 waltz16  
PCPD2 90.00 usec  
PLW2 13.00000000 W  
PLW12 0.27963999 W  
PLW13 0.22651000 W

F2 - Processing parameters  
SI 32768  
SF 100.6204380 MHz  
WDW EM  
SSB 0  
LB 1.00 Hz  
GB 0  
PC 1.40

<sup>13</sup>C -NMR Spectrum of **1i**

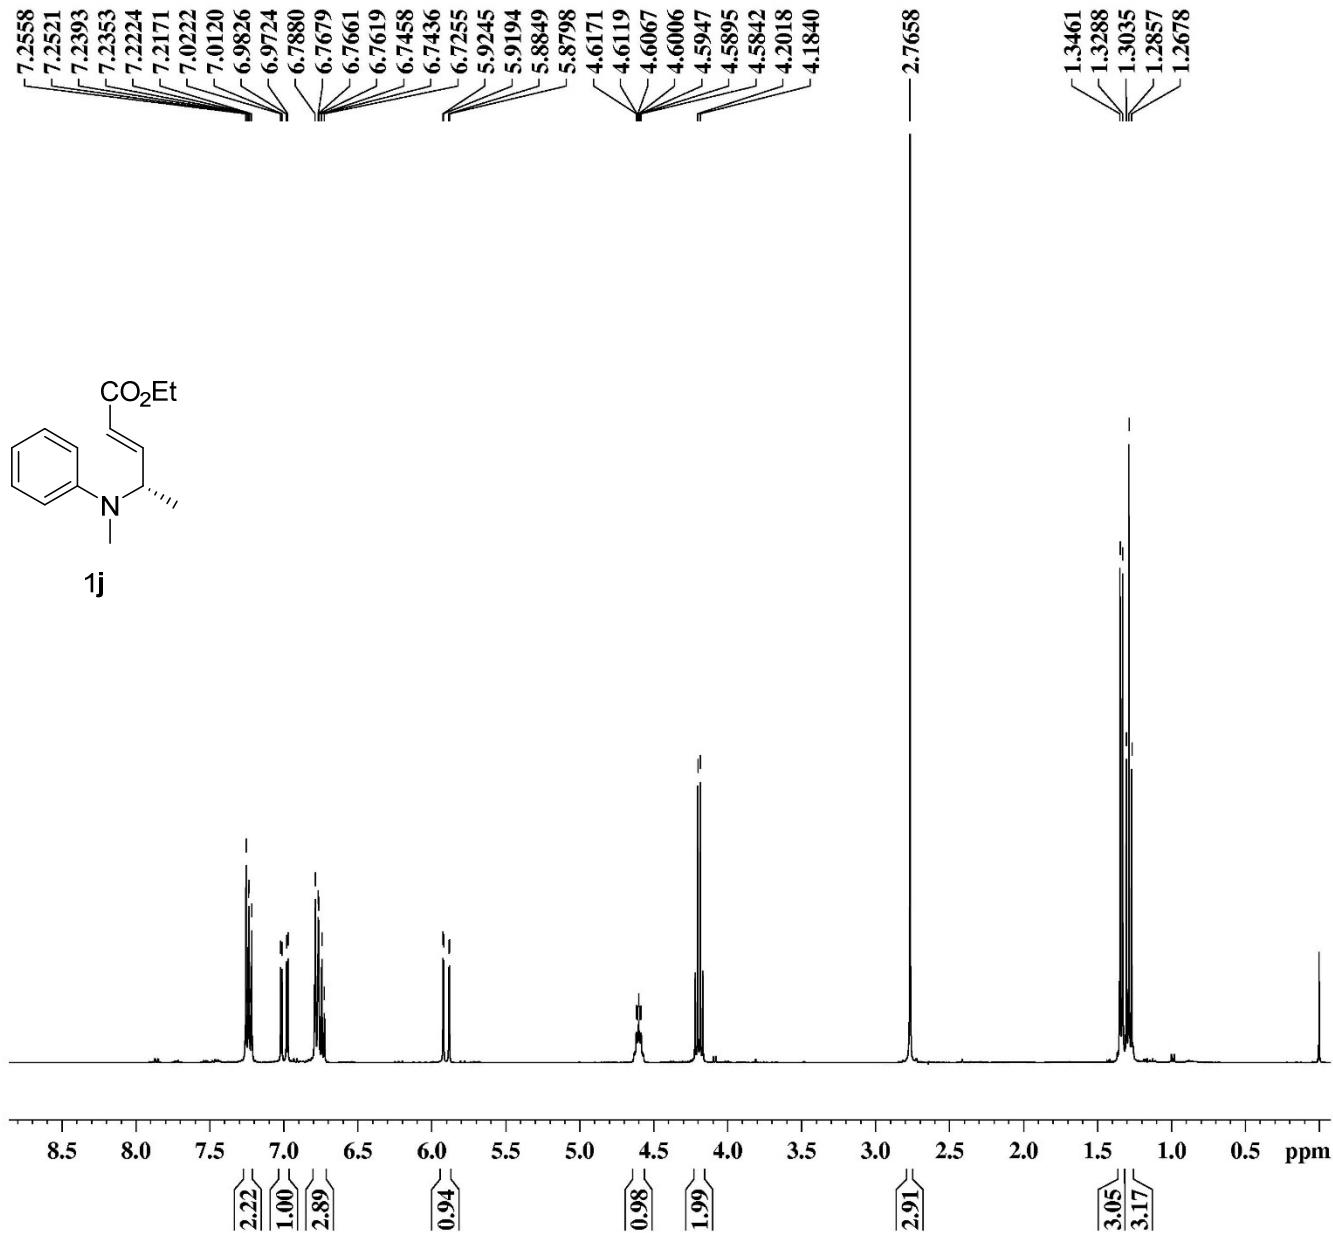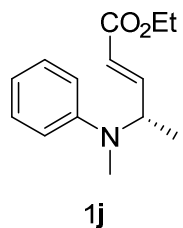

SLK-284  
1H, CDC13

Current Data Parameters  
NAME slk-284  
EXPNO 10  
PROCNO 1

F2 - Acquisition Parameters  
Date\_ 20150730  
Time 6.04  
INSTRUM spect  
PROBHD 5 mm PABBO BB/  
PULPROG zg30  
TD 65536  
SOLVENT CDC13  
NS 8  
DS 0  
SWH 8012.820 Hz  
FIDRES 0.122266 Hz  
AQ 4.0894465 sec  
RG 100.41  
DW 62.400 usec  
DE 6.50 usec  
TE 300.0 K  
D1 1.00000000 sec  
TD0 1

===== CHANNEL f1 =====  
SFO1 400.1629712 MHz  
NUC1 1H  
P1 13.20 usec  
PLW1 13.00000000 W

F2 - Processing parameters  
SI 65536  
SF 400.1605116 MHz  
WDW EM  
SSB 0  
LB 0.30 Hz  
GB 0  
PC 1.00

<sup>1</sup>H -NMR Spectrum of 1j

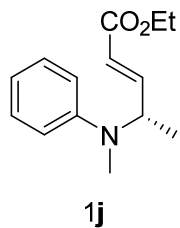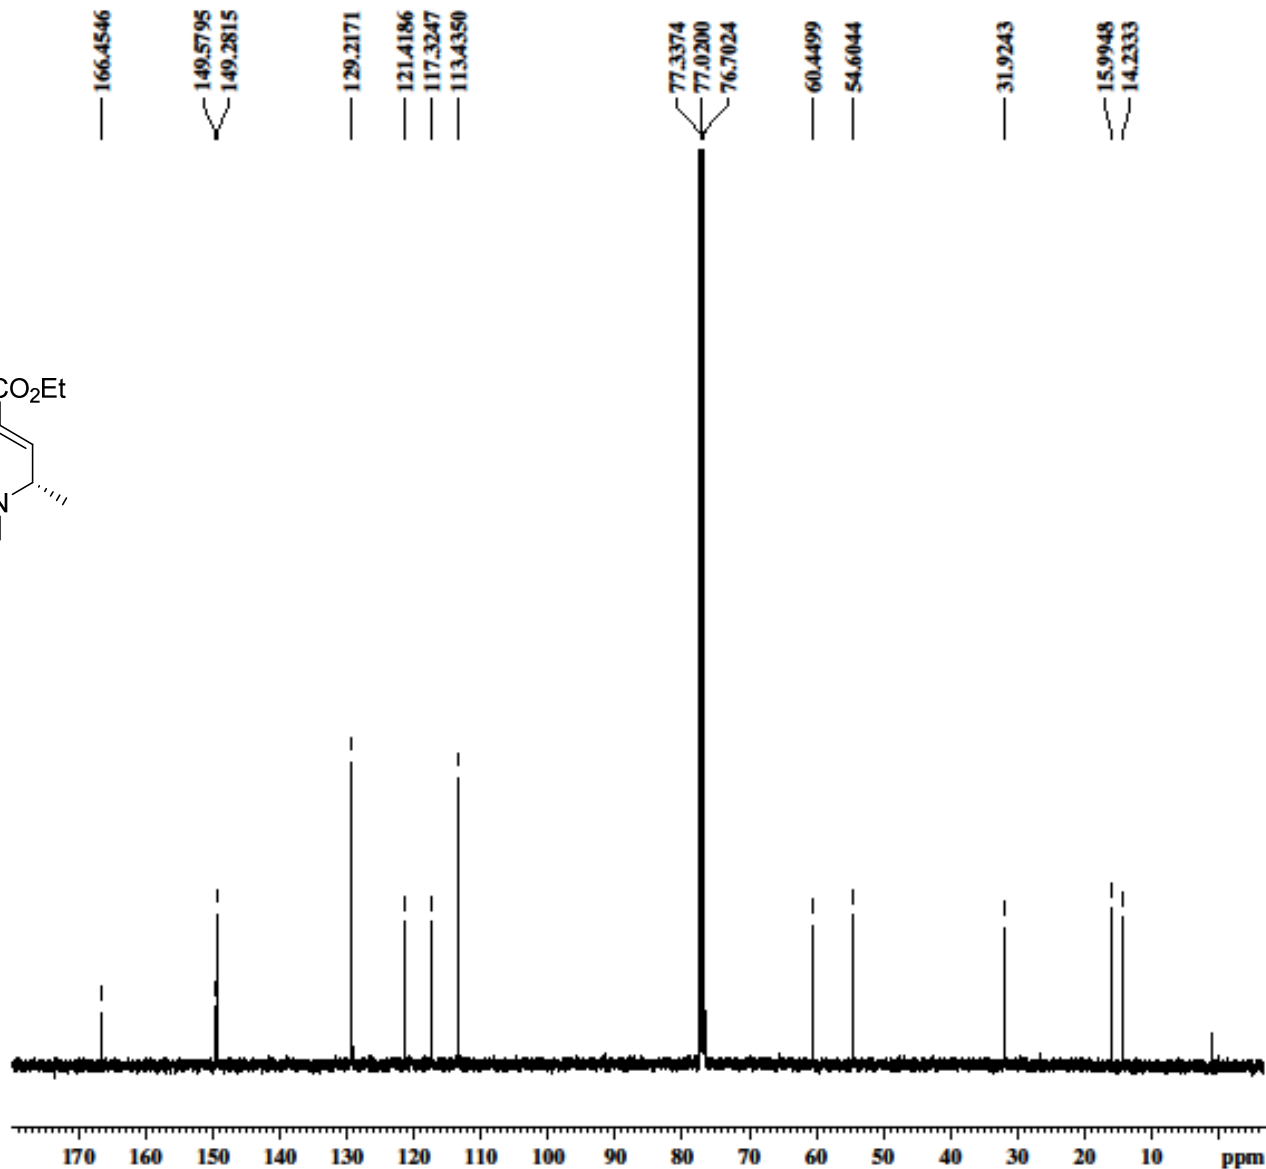

SLK-284  
13C, CDCl3

Current Data Parameters  
 NAME slk-284  
 EXPNO 60  
 PROCNO 1

F2 - Acquisition Parameters  
 Date\_ 20151013  
 Time 7.20  
 INSTRUM spect  
 PROBHD 5 mm PABBO BB  
 PULPROG zgpg30  
 TD 65536  
 SOLVENT CDCl3  
 NS 512  
 DS 0  
 SWH 24038.461 Hz  
 FIDRES 0.366798 Hz  
 AQ 1.3531488 sec  
 RG 201.48  
 DW 20.800 usec  
 DE 6.50 usec  
 TE 300.0 K  
 D1 2.00000000 sec  
 D11 0.03000000 sec  
 TD0 1

==== CHANNEL f1 =====  
 SFO1 100.6304993 MHz  
 NUC1 13C  
 P1 9.00 usec  
 PLW1 61.09999847 W

==== CHANNEL f2 =====  
 SFO2 400.1621006 MHz  
 NUC2 1H  
 CPDPRG2 waltz16  
 PCPD2 90.00 usec  
 PLW2 13.1000038 W  
 PLW12 0.26705000 W  
 PLW13 0.21630999 W

F2 - Processing parameters  
 SI 32768  
 SF 100.6204380 MHz  
 WDW EM  
 SSB 0  
 LB 1.00 Hz  
 GB 0  
 PC 1.40

<sup>13</sup>C -NMR Spectrum of **1j**

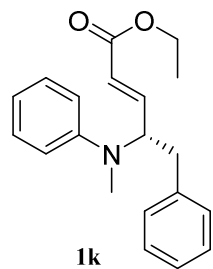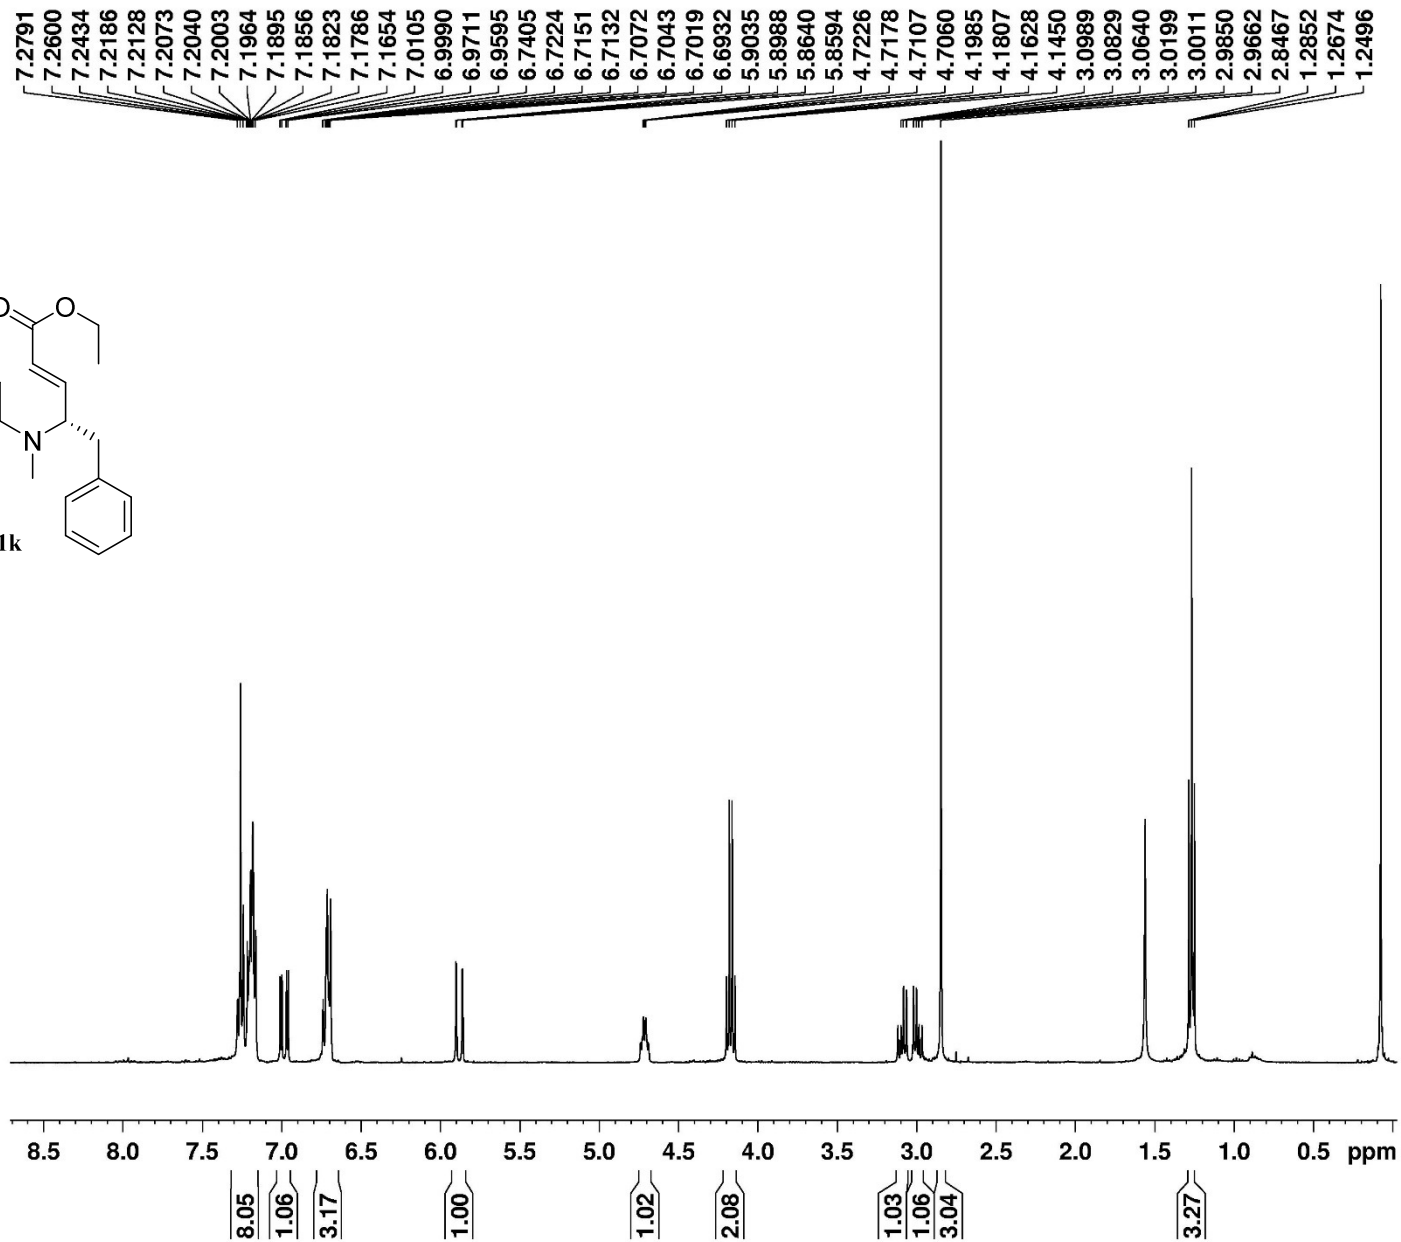

SLK-478W  
1H, CDC13

Current Data Parameters  
NAME SLK-478W  
EXPNO 60  
PROCNO 1

F2 - Acquisition Parameters  
Date 20161230  
Time 15.40  
INSTRUM spect  
PROBHD 5 mm PABBO BB/  
PULPROG zg30  
TD 65536  
SOLVENT CDCl3  
NS 8  
DS 0  
SWH1 8012.820 Hz  
FIDRES 0.122266 Hz  
AQ 4.0894465 sec  
RG 129.57  
DW 62.400 usec  
DE 6.50 usec  
TE 300.0 K  
D1 1.0000000 sec  
TD0 1

==== CHANNEL f1 ====  
SFO1 400.1629712 MHz  
NUC1 1H  
P1 13.20 usec  
PLW1 13.00000000 W

F2 - Processing parameters  
SI 65536  
SF 400.1605095 MHz  
WDW EM  
SSB 0  
LB 0.30 Hz  
GB 0  
PC 1.00

<sup>1</sup>H-NMR Spectrum of **1k**

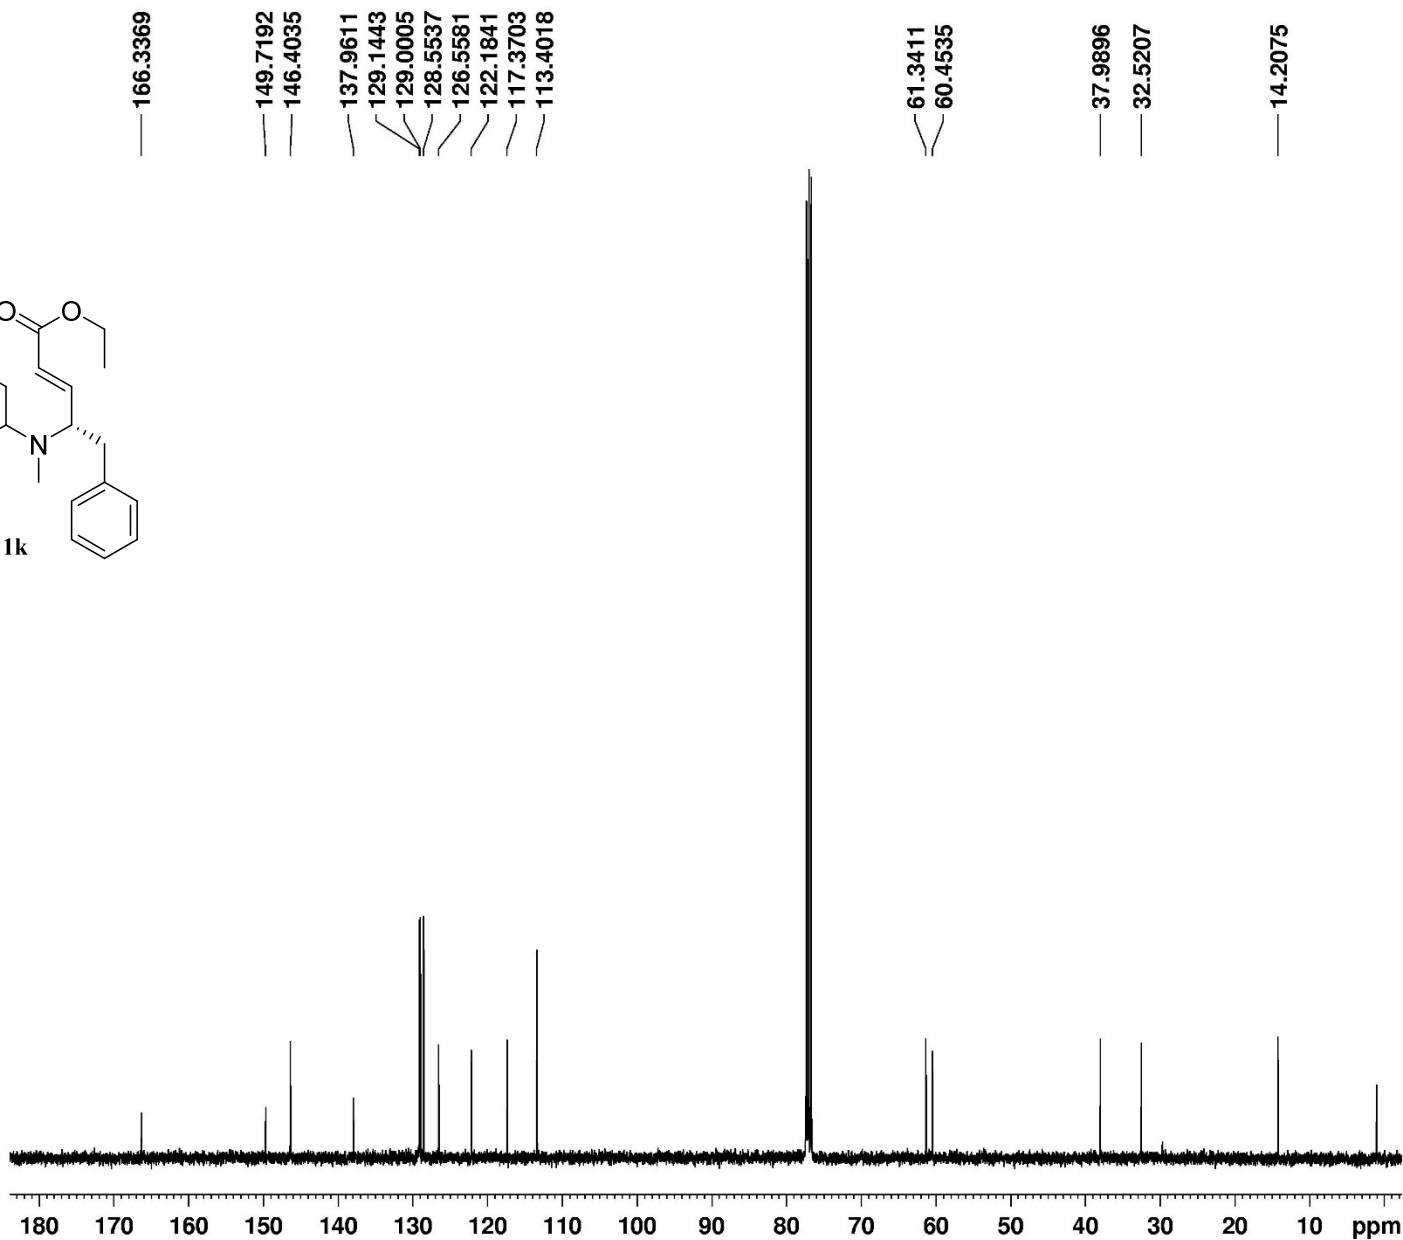

<sup>13</sup>C-NMR Spectrum of **1k**

SLK-478  
13C, CDC13

Current Data Parameters  
NAME SLK-478W  
EXPNO 20  
PROCNO 1

F2 - Acquisition Parameters  
Date\_ 20161231  
Time 17.18  
INSTRUM spect  
PROBHD 5 mm PABBO BB/  
PULPROG zgpg30  
TD 65536  
SOLVENT CDC13  
NS 512  
DS 0  
SWH 24038.461 Hz  
FIDRES 0.366798 Hz  
AQ 1.3631488 sec  
RG 201.48  
DW 20.800 usec  
DE 6.50 usec  
TE 300.0 K  
D1 2.0000000 sec  
D11 0.0300000 sec  
TD0 1

==== CHANNEL f1 ====  
SFO1 100.6304993 MHz  
NUC1 13C  
P1 9.90 usec  
PLW1 53.0000000 W

==== CHANNEL f2 ====  
SFO2 400.1621006 MHz  
NUC2 1H  
CPDPRG2 waltz16  
PCPD2 90.00 usec  
PLW2 13.0000000 W  
PLW12 0.27963999 W  
PLW13 0.22651000 W

F2 - Processing parameters  
SI 32768  
SF 100.6204380 MHz  
WDW EM  
SSB 0  
LB 1.00 Hz  
GB 0  
PC 1.40

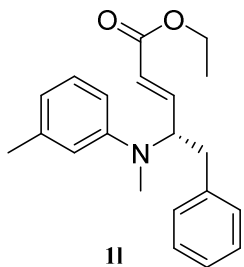

7.2785  
7.2427  
7.2043  
7.1851  
7.1812  
7.1644  
7.1007  
7.0815  
7.0616  
6.9970  
6.9855  
6.9576  
6.9461  
6.5578  
6.5387  
6.5259  
6.5070  
5.8901  
5.8855  
5.8507  
5.8461  
4.7190  
4.7043  
4.6926  
4.6880  
4.6742  
4.1900  
4.1721  
4.1543  
4.1365  
3.1014  
3.0830  
3.0667  
3.0482  
3.0038  
2.9847  
2.9693  
2.9498  
2.8322  
2.2789  
1.2775  
1.2561  
1.2418

SLK-482W  
CDCl3

Current Data Parameters  
NAME SLK-482W  
EXPNO 20  
PROCNO 1

F2 - Acquisition Parameters  
Date\_ 20170103  
Time 15.16  
INSTRUM spect  
PROBHD 5 mm PABBO BB/  
PULPROG zg30  
TD 65536  
SOLVENT CDCl3  
NS 8  
DS 0  
SWH 8012.820 Hz  
FIDRES 0.122266 Hz  
AQ 4.0894465 sec  
RG 129.57  
DW 62.400 usec  
DE 6.50 usec  
TE 300.0 K  
D1 1.00000000 sec  
TD0 1

===== CHANNEL f1 =====  
SFO1 400.1629712 MHz  
NUC1 1H  
P1 13.20 usec  
PLW1 13.00000000 W

F2 - Processing parameters  
SI 65536  
SF 400.1605112 MHz  
WDW EM  
SSB 0  
LB 0.30 Hz  
GB 0  
PC 1.00

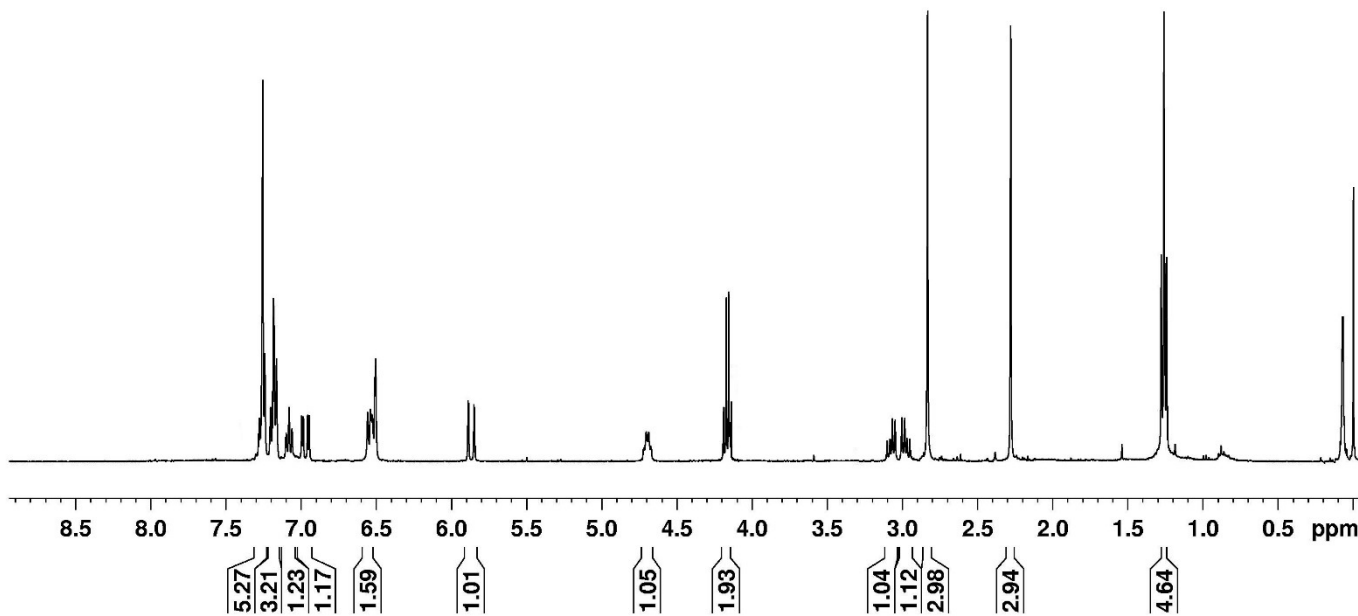

<sup>1</sup>H-NMR Spectrum of **11**

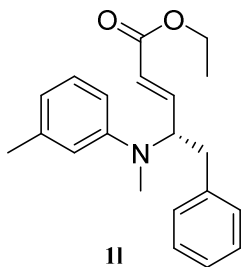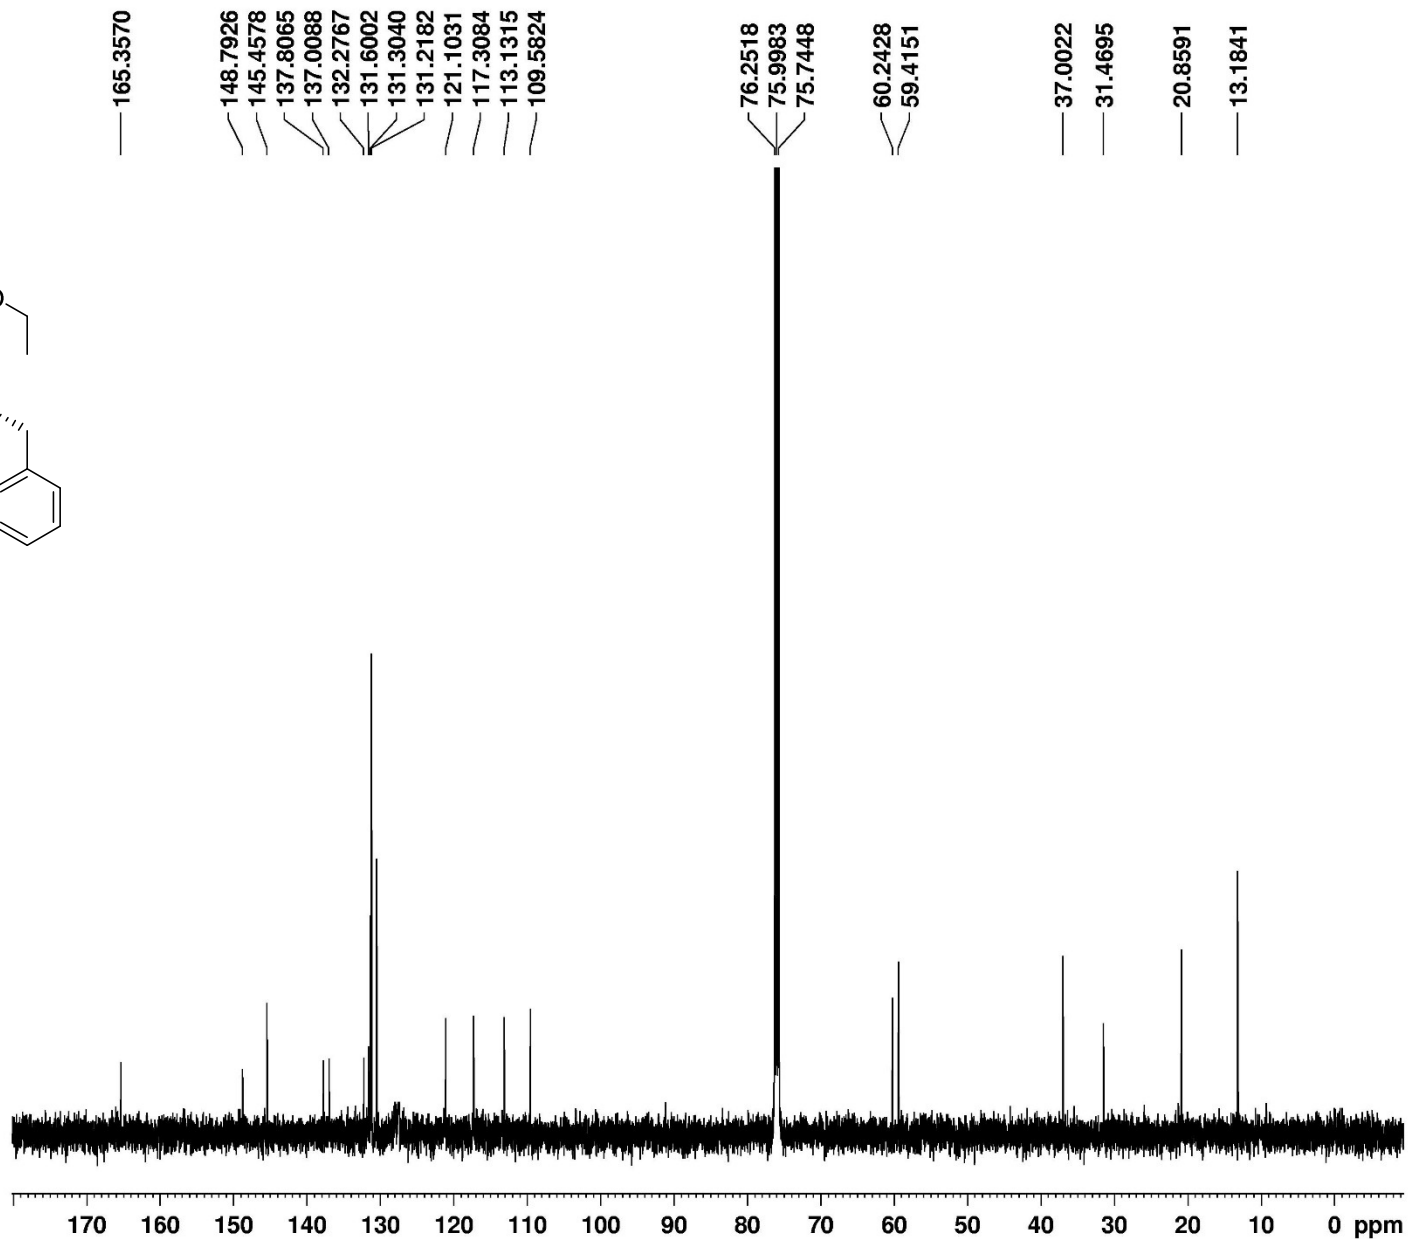

SLK-482 W  
13C, CDC13

Current Data Parameters  
NAME SLK-482W  
EXPNO 40  
PROCNO 1

F2 - Acquisition Parameters  
Date\_ 20170106  
Time 17.23  
INSTRUM spect  
PROBHD 5 mm PATX1 1H/  
PULPROG zgpg30  
TD 65536  
SOLVENT CDC13  
NS 2048  
DS 4  
SWH 29761.904 Hz  
FIDRES 0.454131 Hz  
AQ 1.1010048 sec  
RG 38.43  
DW 16.800 usec  
DE 6.50 usec  
TE 300.0 K  
D1 2.0000000 sec  
D11 0.0300000 sec  
TD0 1

==== CHANNEL f1 ====  
SFO1 125.9077573 MHz  
NUC1 13C  
P1 9.23 usec  
PLW1 244.0000000 W

==== CHANNEL f2 ====  
SFO2 500.6783527 MHz  
NUC2 1H  
CPDPRG2 waltz16  
PCPD2 80.00 usec  
PLW2 13.6000038 W  
PLW12 0.08840500 W  
PLW13 0.05657900 W

F2 - Processing parameters  
SI 32768  
SF 125.8952970 MHz  
WDW EM  
SSB 0  
LB 1.00 Hz  
GB 0  
PC 1.40

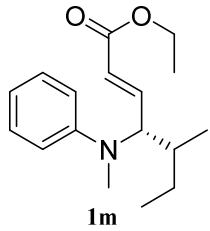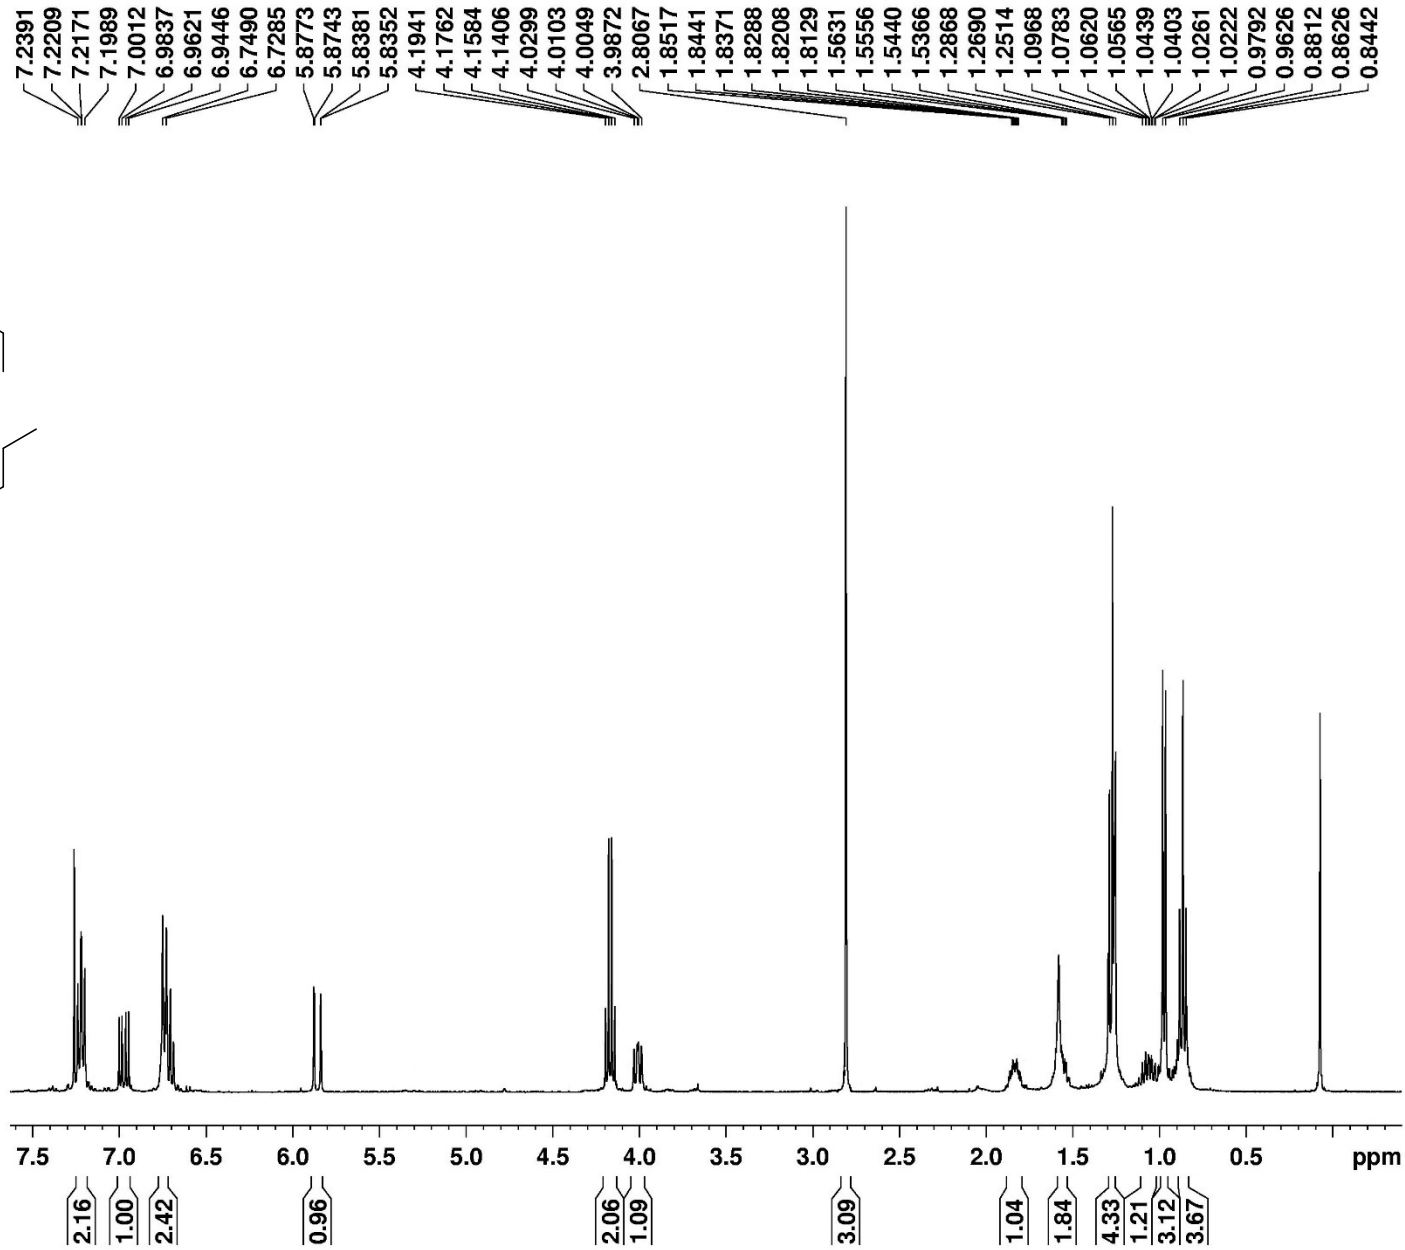

SM-77W,  
1H, CDC13

Current Data Parameters  
NAME SM-77W  
EXPNO 20  
PROCNO 1

F2 - Acquisition Parameters  
Date\_ 20170105  
Time 22.36  
INSTRUM spect  
PROBHD 5 mm PABBO BB/  
PULPROG zg30  
TD 65536  
SOLVENT CDCl3  
NS 8  
DS 0  
SWH 8012.820 Hz  
FIDRES 0.122266 Hz  
AQ 4.0894465 sec  
RG 114.26  
DW 62.400 usec  
DE 6.50 usec  
TE 295.7 K  
D1 1.0000000 sec  
TDO 1

==== CHANNEL f1 ====  
SFO1 400.1629712 MHz  
NUC1 1H  
P1 13.20 usec  
PLW1 13.0000000 W

F2 - Processing parameters  
SI 65536  
SF 400.1605097 MHz  
WDW EM  
SSB 0  
LB 0.30 Hz  
GB 0  
PC 1.00

<sup>1</sup>H-NMR Spectrum of **1m**



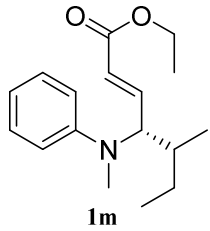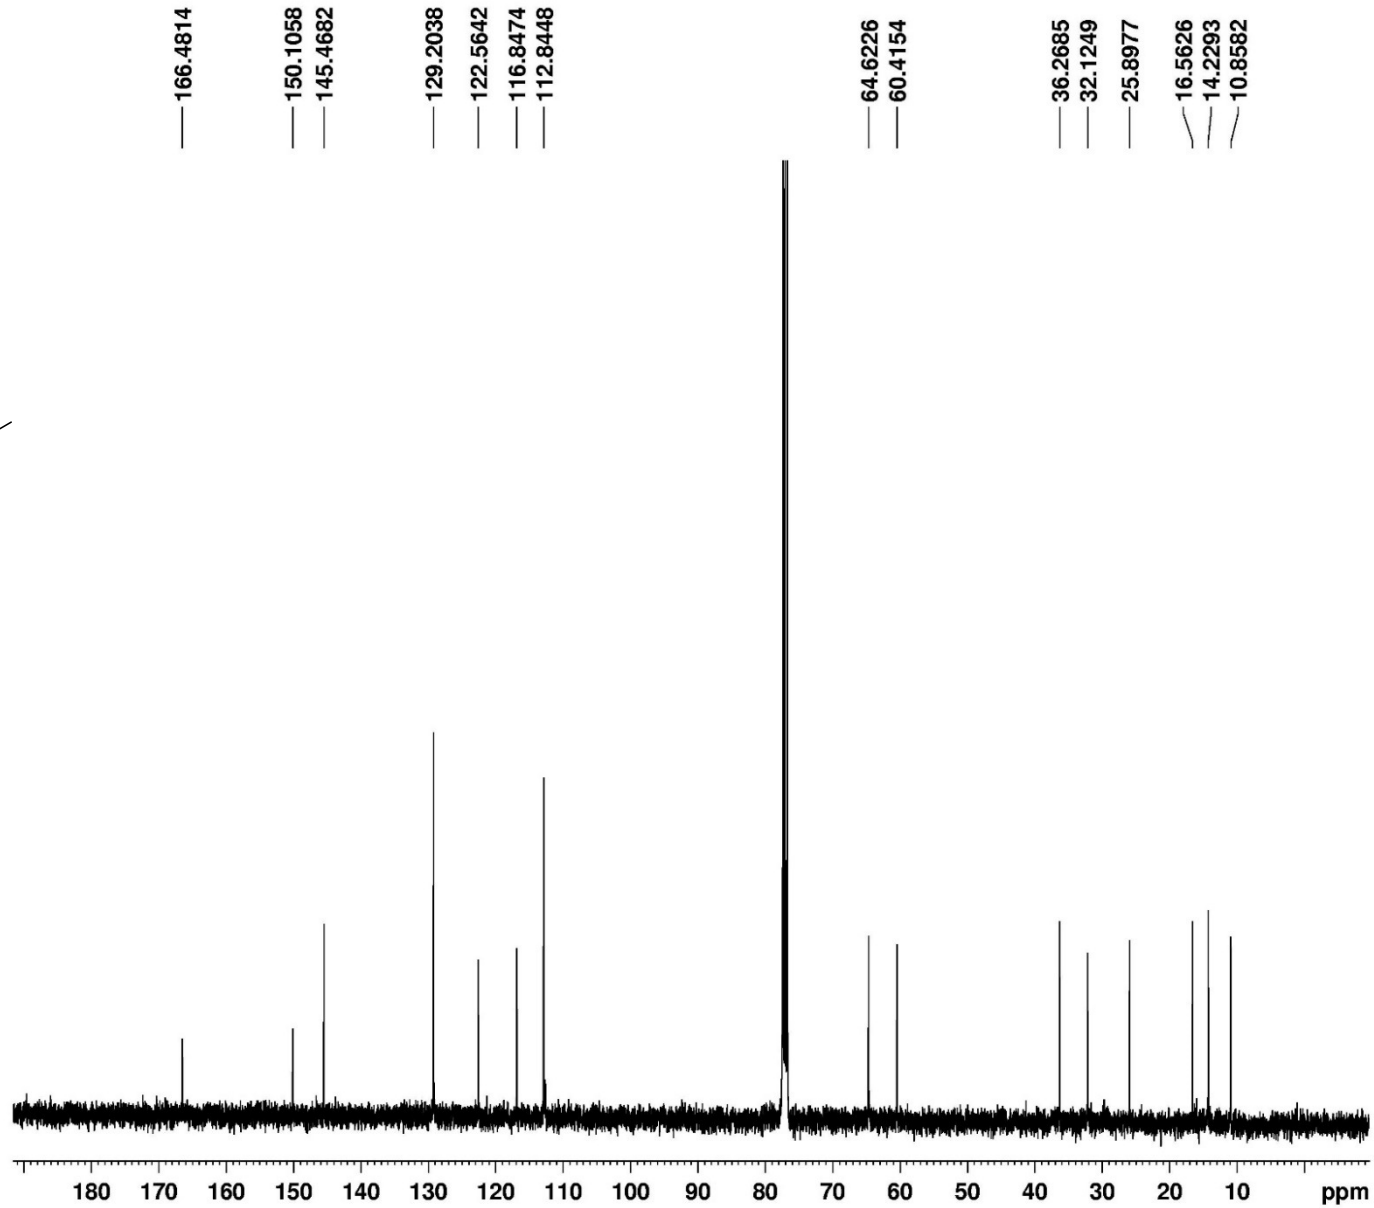

SM-77W,  
13C, CDCl3

Current Data Parameters  
NAME SM-77WN  
EXPNO 20  
PROCNO 1

F2 - Acquisition Parameters  
Date\_ 20170107  
Time 23.09  
INSTRUM spect  
PROBHD 5 mm PABBO BB/  
PULPROG zgpg30  
TD 65536  
SOLVENT CDCl3  
NS 512  
DS 0  
SWH 24038.461 Hz  
FIDRES 0.366798 Hz  
AQ 1.3631488 sec  
RG 201.48  
DW 20.800 usec  
DE 6.50 usec  
TE 296.7 K  
D1 2.00000000 sec  
D11 0.03000000 sec  
TD0 1

==== CHANNEL f1 ====  
SFO1 100.6304993 MHz  
NUC1 13C  
P1 9.90 usec  
PLW1 53.00000000 W

==== CHANNEL f2 ====  
SFO2 400.1621006 MHz  
NUC2 1H  
CPDPRG2 waltz16  
PCPD2 90.00 usec  
PLW2 13.00000000 W  
PLW12 0.27963999 W  
PLW13 0.22651000 W

F2 - Processing parameters  
SI 32768  
SF 100.6204380 MHz  
WDW EM  
SSB 0  
LB 1.00 Hz  
GB 0  
PC 1.40

<sup>13</sup>C-NMR Spectrum of **1m**

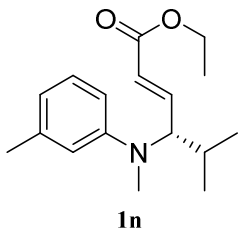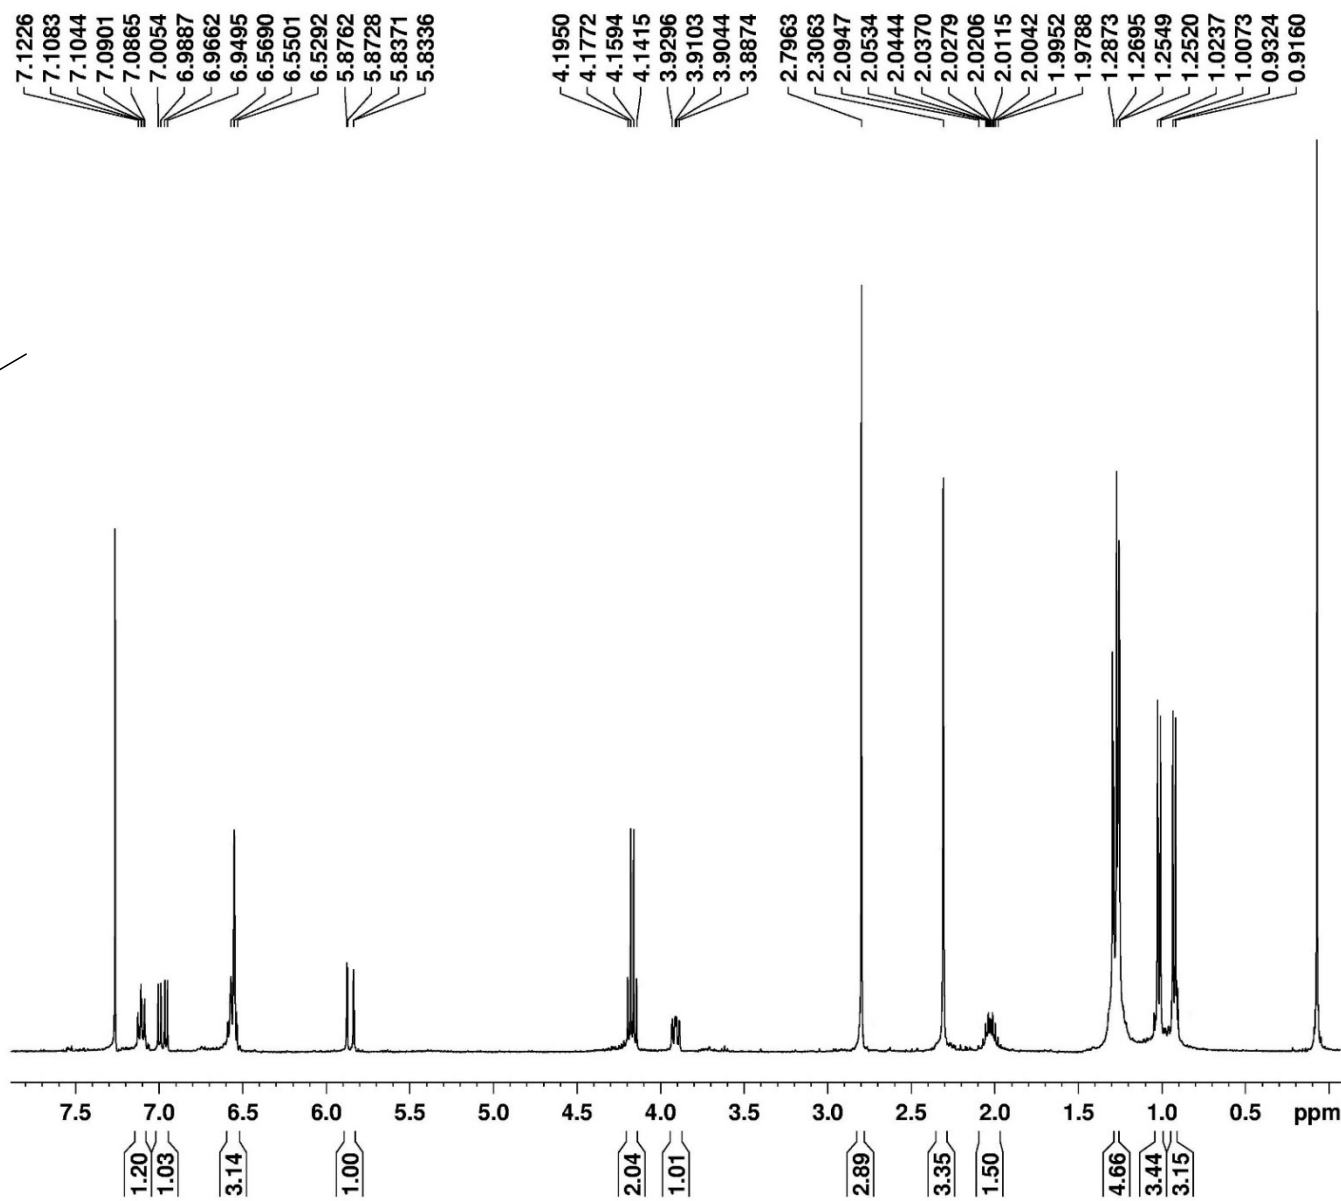

SM-80W  
1H, CDCl3

Current Data Parameters  
 NAME SM-80W  
 EXPNO 30  
 PROCNO 1

F2 - Acquisition Parameters  
 Date\_ 20170105  
 Time 22.45  
 INSTRUM spect  
 PROBHD 5 mm PABBO BB/  
 PULPROG zg30  
 TD 65536  
 SOLVENT CDCl3  
 NS 8  
 DS 0  
 SWH 8012.820 Hz  
 FIDRES 0.122266 Hz  
 AQ 4.0894465 sec  
 RG 129.57  
 DW 62.400 usec  
 DE 6.50 usec  
 TE 295.7 K  
 DI 1.00000000 sec  
 TD0 1

==== CHANNEL f1 ====  
 SFO1 400.1629712 MHz  
 NUC1 1H  
 P1 13.20 usec  
 PLW1 13.00000000 W

F2 - Processing parameters  
 SI 65536  
 SF 400.1605096 MHz  
 WDW EM  
 SSB 0  
 LB 0.30 Hz  
 GB 0  
 PC 1.00

<sup>1</sup>H-NMR Spectrum of **1n**

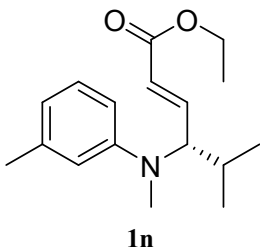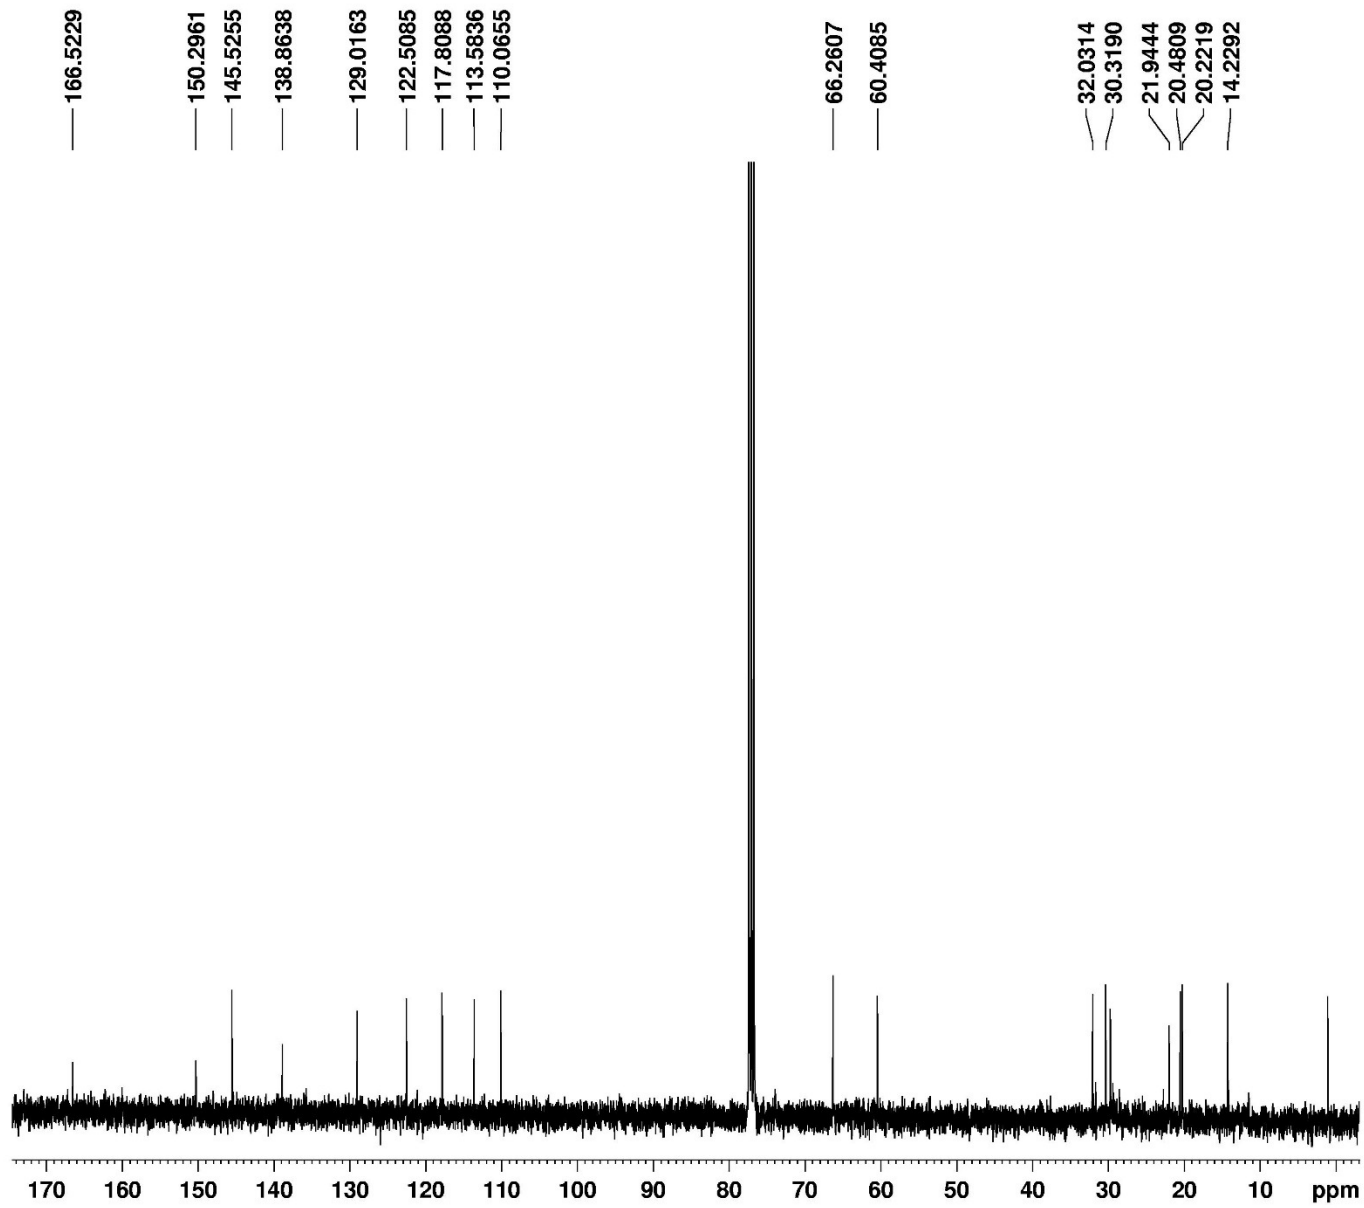

SM-80W,  
13C, CDCl<sub>3</sub>

Current Data Parameters  
NAME SM-80WN  
EXPNO 30  
PROCNO 1

F2 - Acquisition Parameters  
Date\_ 20170107  
Time 23.44  
INSTRUM spect  
PROBHD 5 mm PABBO BB/  
PULPROG zgpg30  
TD 65536  
SOLVENT CDCl<sub>3</sub>  
NS 512  
DS 0  
SWH1 24038.461 Hz  
FIDRES 0.366798 Hz  
AQ 1.3631488 sec  
RG 201.48  
DW 20.800 usec  
DE 6.50 usec  
TE 296.8 K  
D1 2.0000000 sec  
D11 0.03000000 sec  
TD0 1

==== CHANNEL f1 ====  
SFO1 100.6304993 MHz  
NUC1 13C  
P1 9.90 usec  
PLW1 53.00000000 W

==== CHANNEL f2 ====  
SFO2 400.1621006 MHz  
NUC2 1H  
CPDPRG2 waltz16  
PCPD2 90.00 usec  
PLW2 13.00000000 W  
PLW12 0.27963999 W  
PLW13 0.22651000 W

F2 - Processing parameters  
SI 32768  
SF 100.6204380 MHz  
WDW EM  
SSB 0  
LB 1.00 Hz  
GB 0  
PC 1.40

<sup>13</sup>C-NMR Spectrum of **1n**

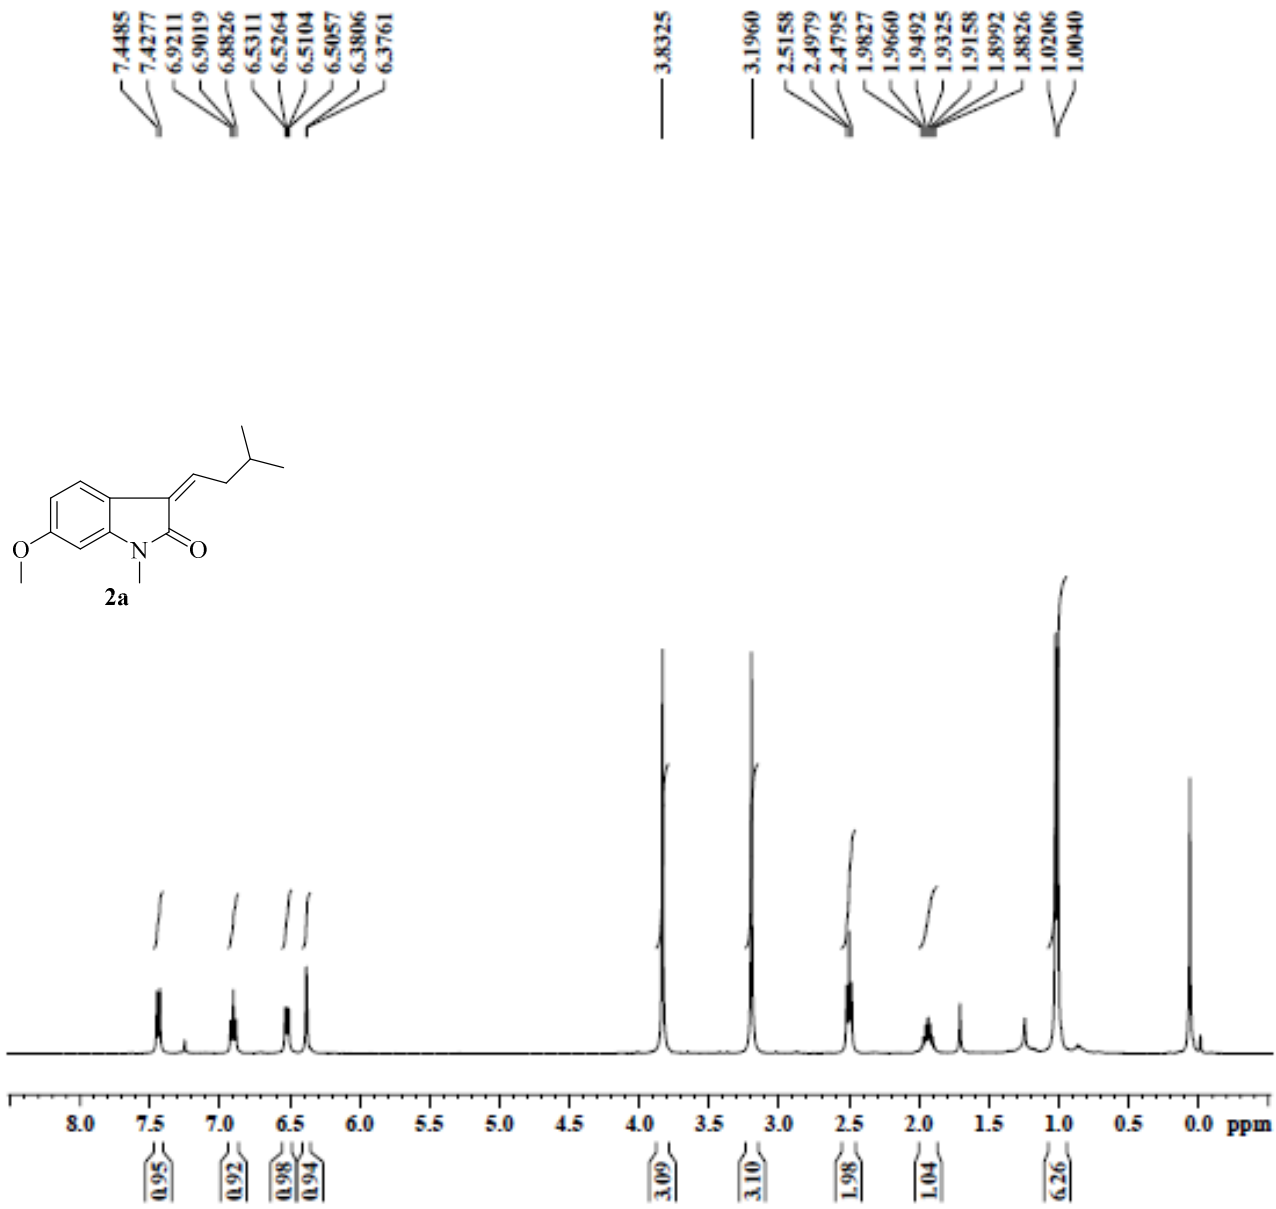

**SKM-522B F**  
**1H, CDCl3**

Current Data Parameters  
NAME SKM-522B,1H,400 MHz,29.4.13.E  
EXPNO 310  
PROCNO 1

F2 - Acquisition Parameters  
Date\_ 20130429  
Time 8.15  
INSTRUM spect  
PROBHD 5 mm PABBO BB  
PULPROG zg30  
TD 65536  
SOLVENT CDCl3  
NS 8  
DS 0  
SWH 8012.820 Hz  
FIDRES 0.122266 Hz  
AQ 4.0084966 sec  
RG 65.65  
DW 62.400 usec  
DE 6.50 usec  
TE 300.0 K  
D1 1.00000000 sec  
TDO 1

----- CHANNEL f1 -----  
SFO1 400.1620712 MHz  
NUC1 1H  
P1 12.35 usec

F2 - Processing parameters  
SI 65536  
SF 400.1605138 MHz  
WDW EM  
SSB 0  
LB 0.30 Hz  
GB 0  
PC 1.00

<sup>1</sup>H -NMR Spectrum of **2a**

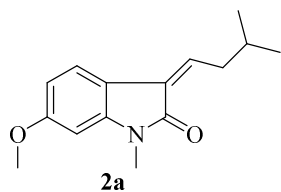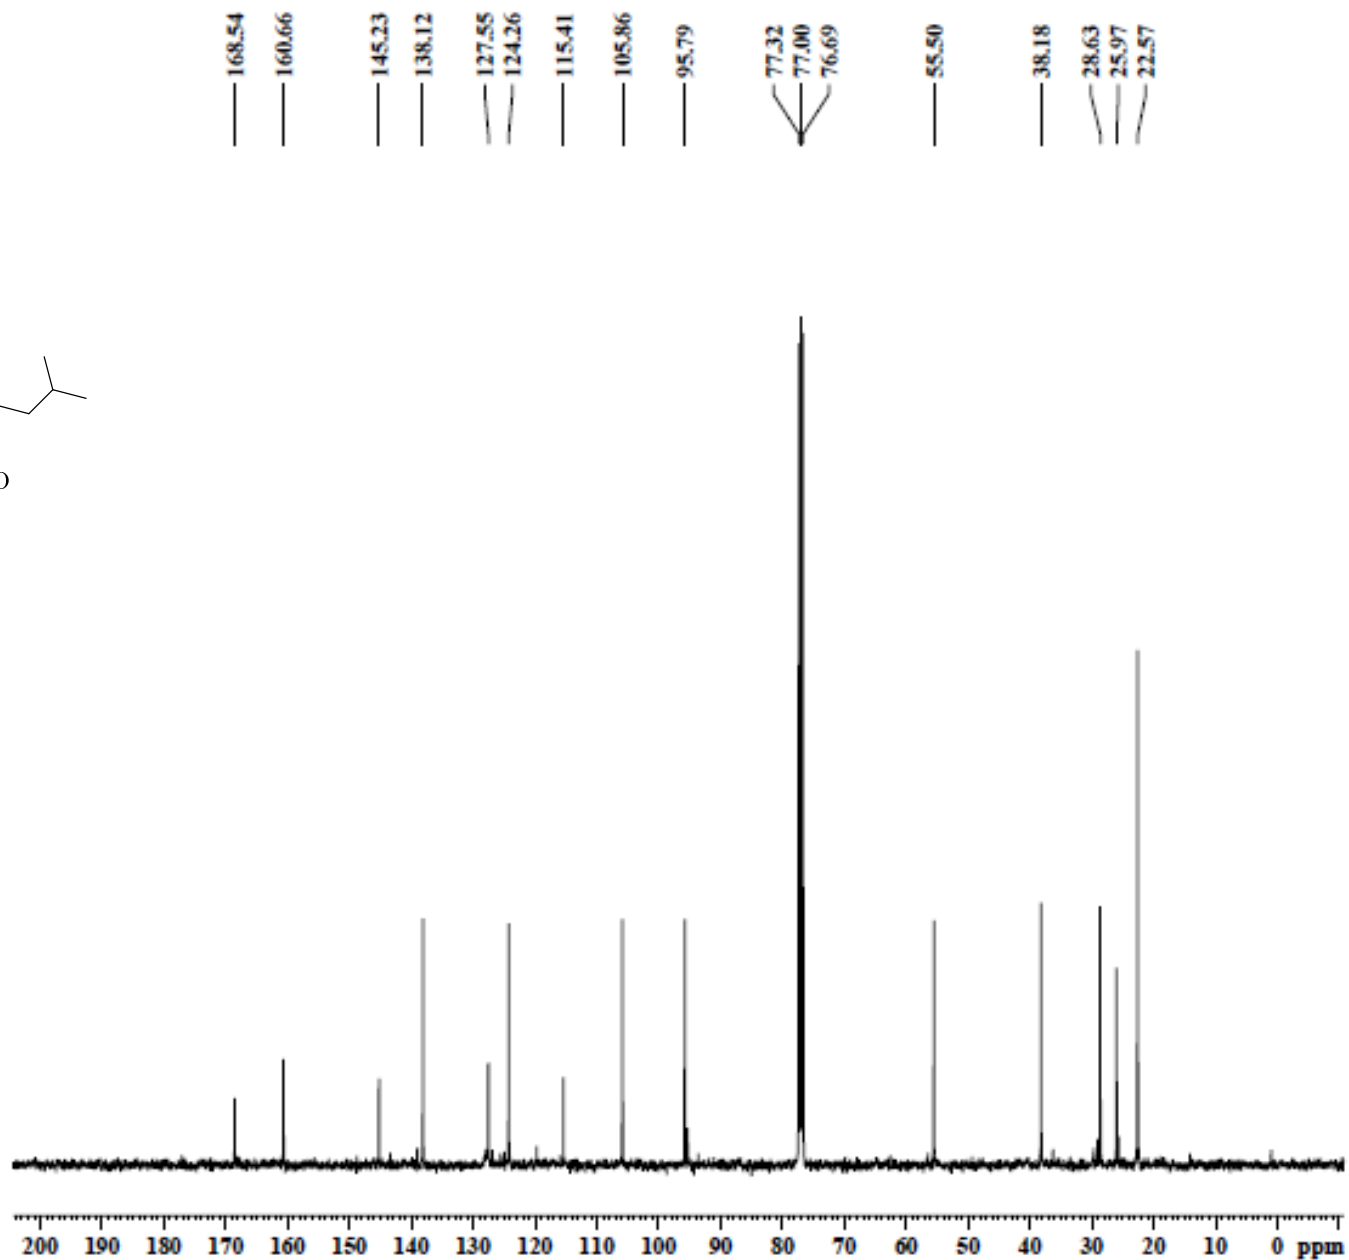

SKM-522B  
13C, CDCl3

Current Data Parameters  
NAME SKM-522B,13C,400 MHz,17.5.13,M.FF  
EXPNO 510  
PROCNO 1

F2 - Acquisition Parameters  
Date\_ 20130517  
Time 11.50  
INSTRUM spect  
PROBHD 5 mm PABBO BB/  
PULPROG zgpg30  
TD 65536  
SOLVENT CDCl3  
NS 512  
DS 0  
SWH 24038.461 Hz  
FIDRES 0.366798 Hz  
AQ 1.3631988 sec  
RG 201.48  
DW 20.800 usec  
DE 6.50 usec  
TE 300.0 K  
D1 2.00000000 sec  
D11 0.03000000 sec  
TD0 1

\*\*\*\*\* CHANNEL f1 \*\*\*\*\*  
SFO1 100.6204893 MHz  
NUC1 13C  
P1 6.20 usec

F2 - Processing parameters  
SI 32768  
SF 100.6204418 MHz  
WDW EM  
SSB 0  
LB 3.00 Hz  
GB 0  
PC 1.40

<sup>13</sup>C -NMR Spectrum of 2a

SKM-522B  
COSY, CDC13

Current Data Parameters  
NAME SKM-522B\_COSY\_400 MHz\_21 Jun\_2013  
EXPNO 101  
PROCNO 1

F2 - Acquisition Parameters  
Date\_ 20130322  
Time 2.51  
INSTRUM spect  
PROBHD 5 mm PABBO BBI  
PULPROG cyeypptpf  
TD 2640  
SOLVENT CDCl3  
NS 32  
DS 0  
SWH 3267.874 Hz  
FIDRES 1.59690 Hz  
AQ 0.3123440 sec  
RG 65.65  
DW 183.000 usec  
DE 8.50 usec  
TE 300.7 K  
D0 0.0000000 sec  
D1 1.37034895 sec  
D11 0.0000000 sec  
D12 0.0002000 sec  
D13 0.0000000 sec  
D16 0.0002000 sec  
SFO 0.0000000 sec

\*\*\*\*\* CHANNEL f1 \*\*\*\*\*  
SFO1 400.1821060 MHz  
NUC1 1H  
P0 12.35 usec  
P1 12.35 usec  
P1T 2500.00 usec  
PLW1 14.0000000 W  
PLW10 3.15079859 W

\*\*\*\*\* GRADIENT CHANNEL \*\*\*\*\*  
GPNAM[1] SMSQ10.100  
GPZ1 10.00 %  
P16 1900.00 usec

F1 - Acquisition parameters  
TD 128  
SFO1 400.1821 MHz  
FIDRES 26.531946 Hz  
SW 0.187 ppm  
F0MODE GF

F2 - Processing parameters  
SI 1024  
SF 400.1805129 MHz  
WDWV 0  
SSB 0  
LB 0 Hz  
GB 0  
PC 1.40

F1 - Processing parameters  
SI 1024  
MC2 GF  
SF 400.1805129 MHz  
WDWV 0  
SSB 0  
LB 0 Hz  
GB 0

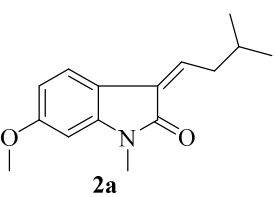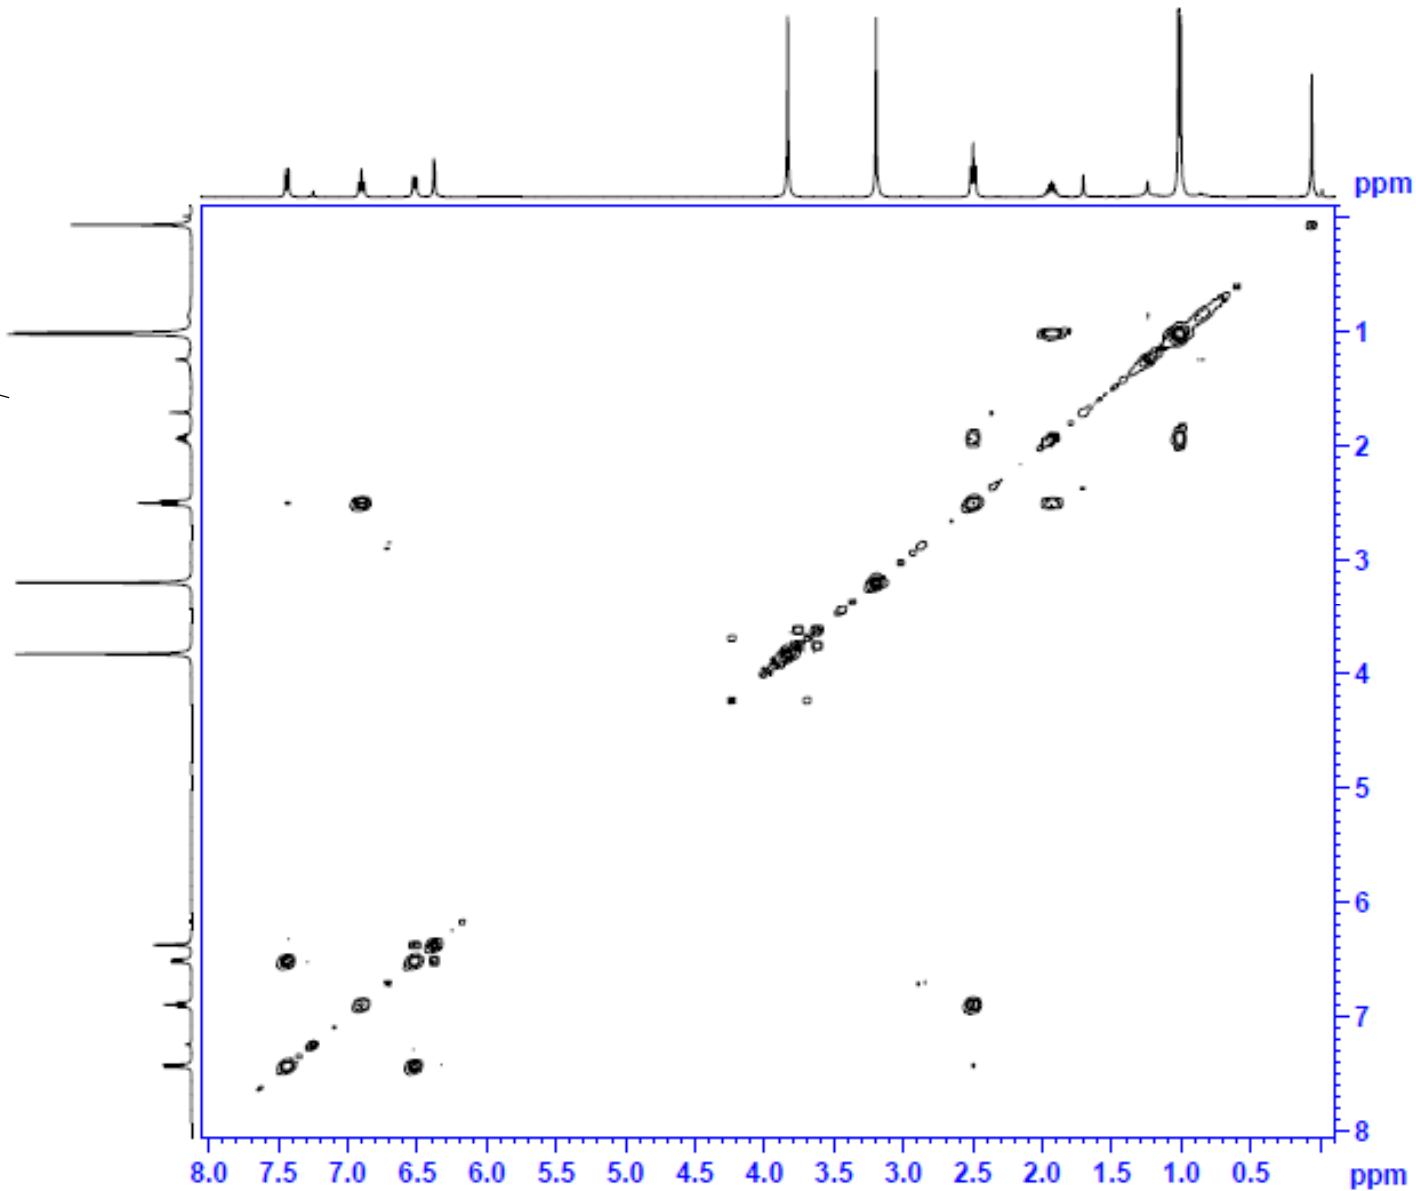

COSY Spectrum of 2a

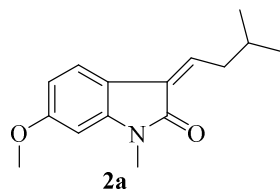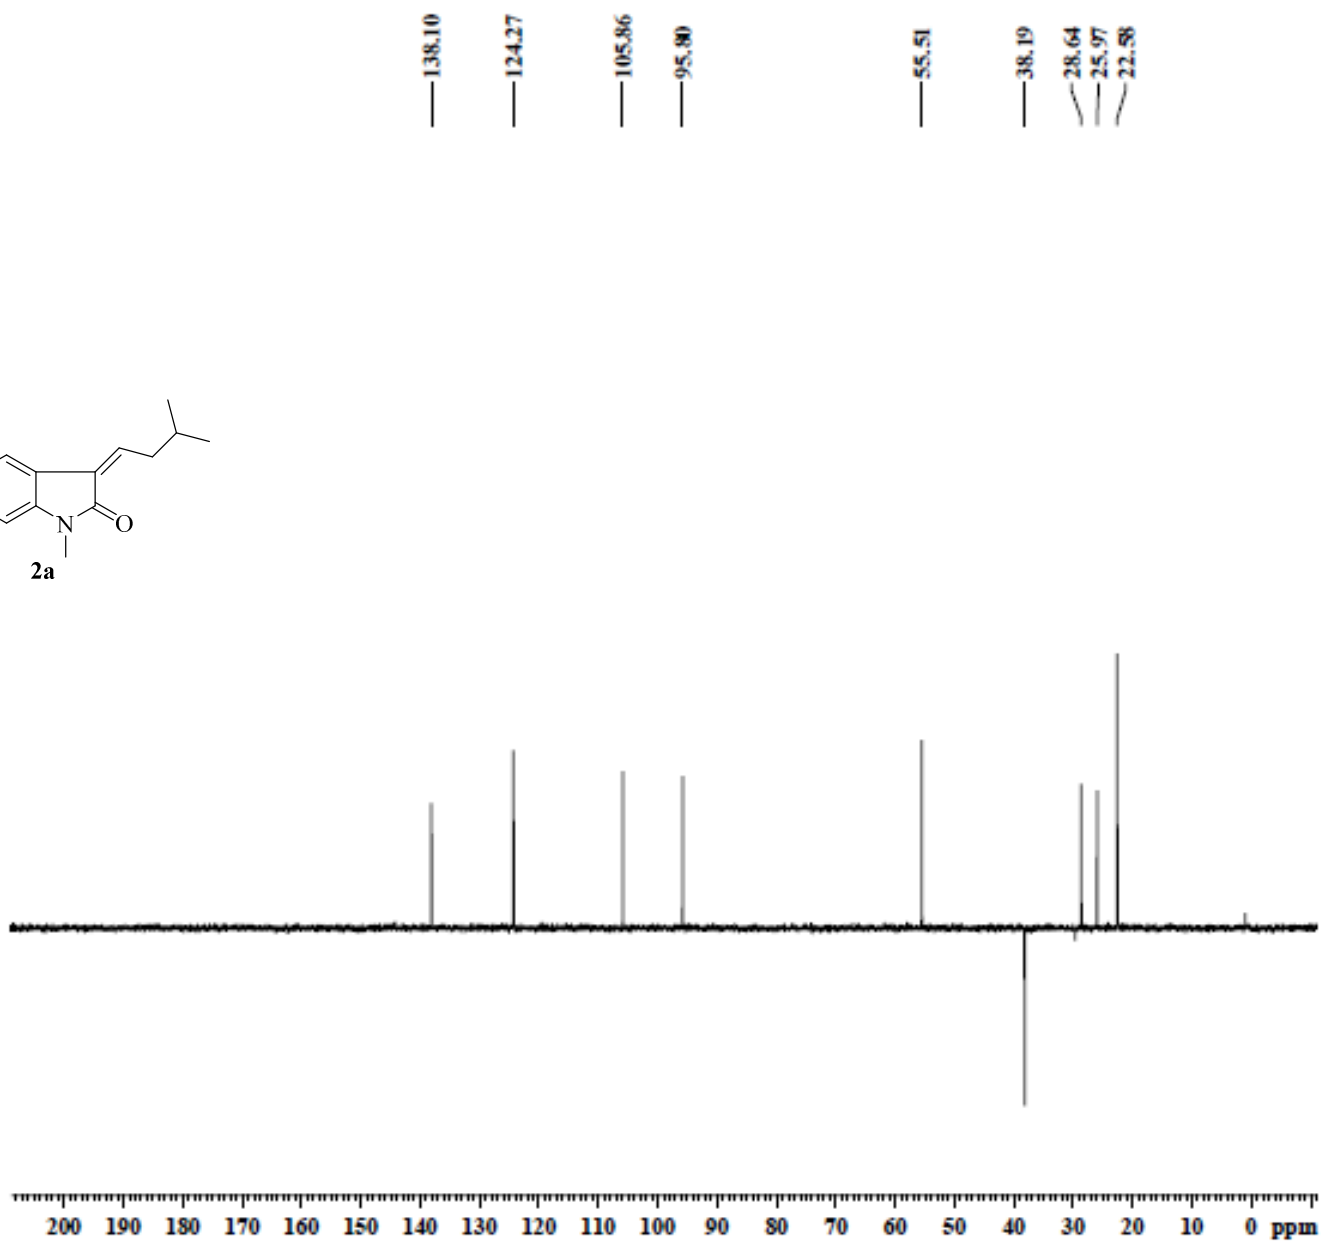

SKM-522B  
DEPT-I, CDCl<sub>3</sub>

Current Data Parameters  
NAME SKM-522B, DEPT-I, 300 MHz, 6.5.13.M  
EXPNO 350  
PROCNO 1

F2 - Processing parameters  
SI 32768  
SF 75.4677506 MHz  
WDW EM  
SSB 0  
LB 1.00 Hz  
GB 0  
PC 1.40

DEPT-I Spectrum of **2a**

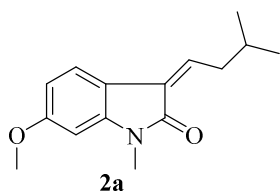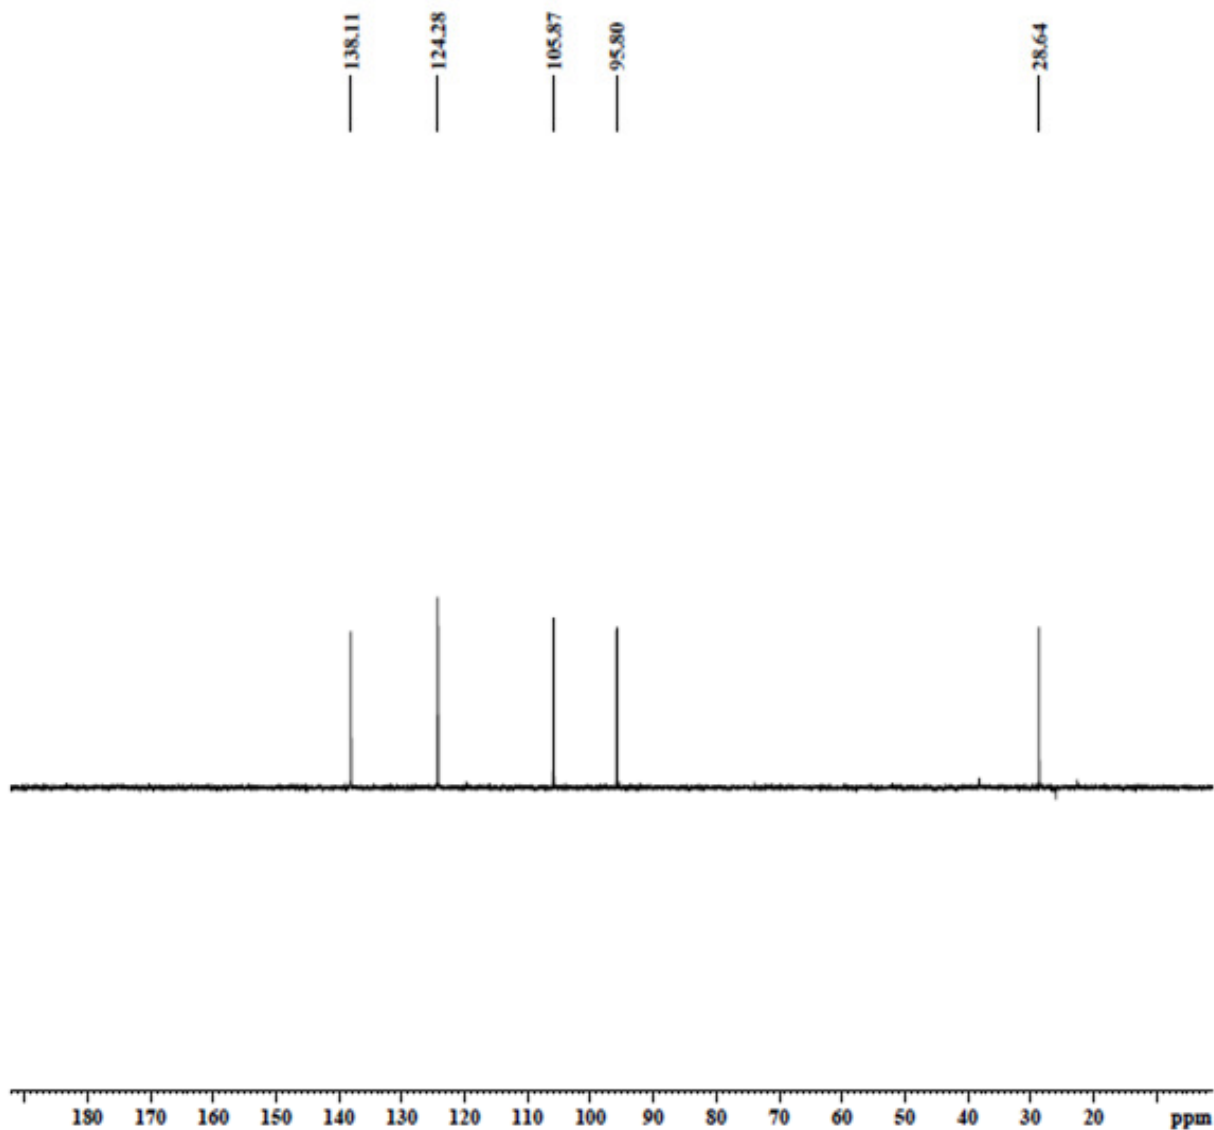

SKM-522B  
DEPT-II. CDCL3

```

Current Data Parameters
NAME: SKM-522B-DEPT-1,300 MHz,AS,15.M
EXPNO: 381
PROCNO: 1

F2 - Acquisition Parameters
Date_: 20130606
Time: 9.13
INSTRUM: agpt
PROBHD: 5 mm QNP 1H/13
PULPROG: zgpg30
TD: 65536
SOLVENT: CDCl3
NS: 204
DS: 4
SWH: 19023.840 Hz
FREQS: 0.270990 Hz
AQ: 1.8175019 sec
RG: 3990
SF: 27.720 MHz
AQ: 18.30 sec
TE: 300.2 K
CNS12: 148.000000 sec
D1: 2.0000000 sec
D2: 0.0000000 sec
D3: 0.0000000 sec
TDR: 1

===== CHANNEL f1 =====
NUC1: 13C
P1: 5.15 sec
PL1: 19.10 dB
PL12: -3.00 dB
PL1W: 55.1500000 W
SFO1: 75.4782603 MHz

===== CHANNEL f2 =====
CPROG2: waltz16
NUC2: 1H
P2: 10.00 sec
PL2: 20.00 dB
PL2W: 50.00 dB
PL2: -1.00 dB
PL12: 17.00 dB
PL2W: 18.0000000 W
PL1W2: 0.2000000 W
SFO2: 300.1312000 MHz

F2 - Processing parameters
SI: 32768
SF: 75.4777601 MHz
WDW: EM
SSB: 0
LB: 1.00 Hz
GB: 0
PC: 1.40

```

DEPT-II Spectrum of **2a**



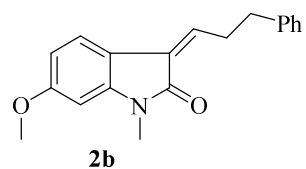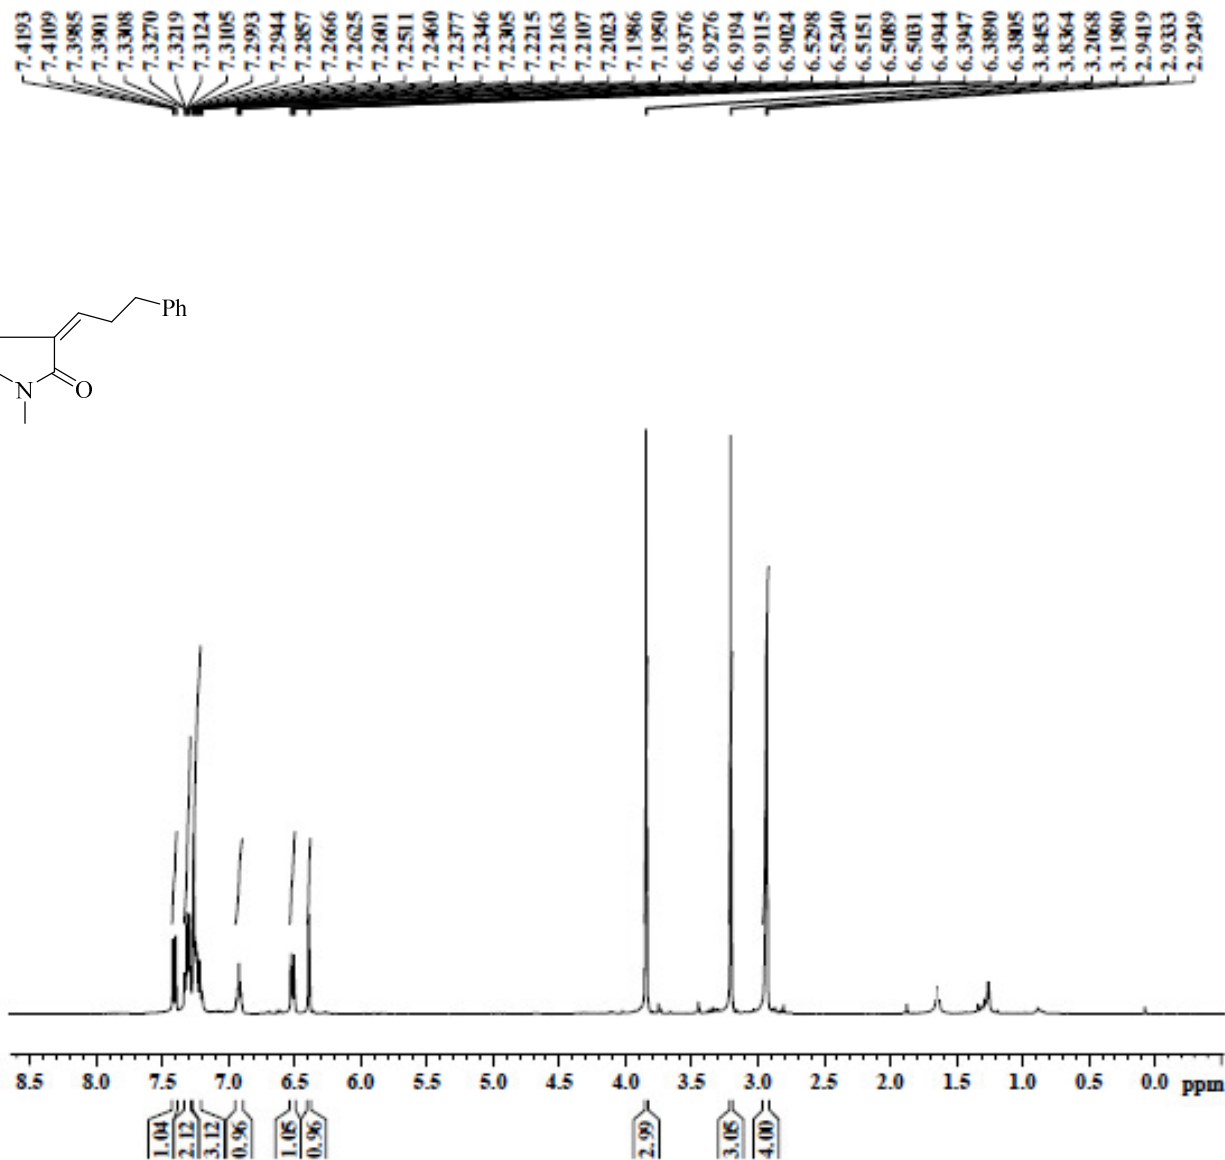

SKM-648  
1H, CDC13

Current Data Parameters  
NAME SKM-648,1H,400 MHz,6 Sep,2013.M  
EXPNO 40  
PROCNO 1

F2 - Acquisition Parameters  
Date\_ 20130907  
Time 10.46  
INSTRUM spect  
PROBHD 5 mm PABBO BB/  
PULPROG zg30  
TD 65536  
SOLVENT CDC13  
NS 512  
DS 2  
SWH 8012.820 Hz  
FIDRES 0.122266 Hz  
AQ 4.089465 sec  
RG 100.41  
DW 62.400 usec  
DE 6.50 usec  
TE 300.0 K  
D1 1.0000000 sec  
TDO 1

\*\*\*\*\* CHANNEL f1 \*\*\*\*\*  
SFO1 400.1629712 MHz  
NUC1 1H  
P1 12.35 usec  
PLW1 14.00000000 W

F2 - Processing parameters  
SI 65536  
SF 400.1605109 MHz  
WDW EM  
SSB 0  
LB 0.30 Hz  
GB 0  
PC 1.00

<sup>1</sup>H -NMR Spectrum of **2b**

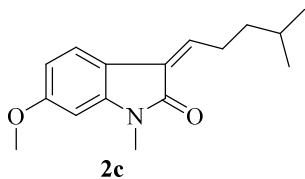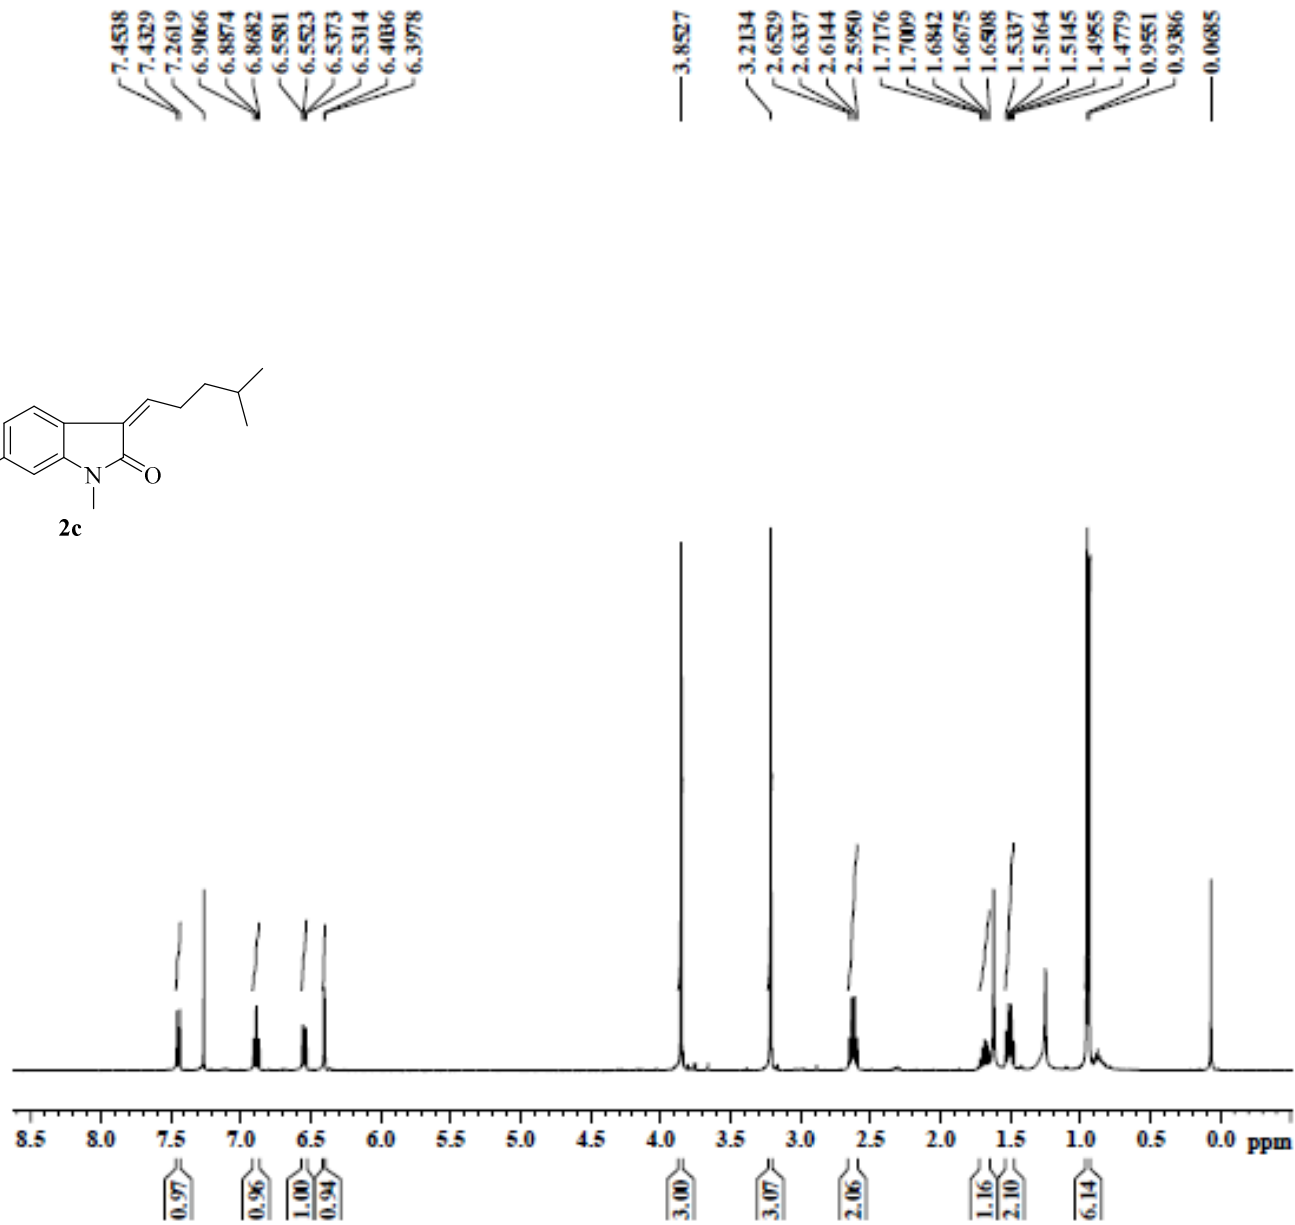

SKM-652  
1H, CDCl3

Current Data Parameters  
NAME SKM-652,1H,400 MHz,11 Sep,2013.M  
EXPNO 50  
PROCNO 1

F2 - Acquisition Parameters  
Date\_ 20130911  
Time 15.53  
INSTRUM spect  
PROBHD 5 mm PABBO BB/  
PULPROG zg30  
TD 65536  
SOLVENT CDCl3  
NS 8  
DS 0  
SWH 9615.385 Hz  
FIDRES 0.146719 Hz  
AQ 3.4076720 sec  
RG 114.26  
DW 52.000 usec  
DE 5.20 usec  
TE 294.1 K  
D1 1.00000000 sec  
TD0 1

===== CHANNEL f1 =====  
SFO1 400.1629712 MHz  
NUC1 1H  
P1 12.38 usec  
PLW1 14.30000000 W  
  
F2 - Processing parameters  
SI 65536  
SF 400.1605097 MHz  
WDW EM  
SSB 0  
LB 0.30 Hz  
GB 0  
PC 1.00

<sup>1</sup>H -NMR Spectrum of 2c

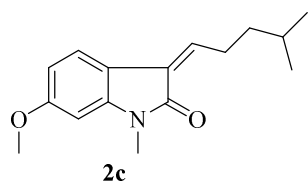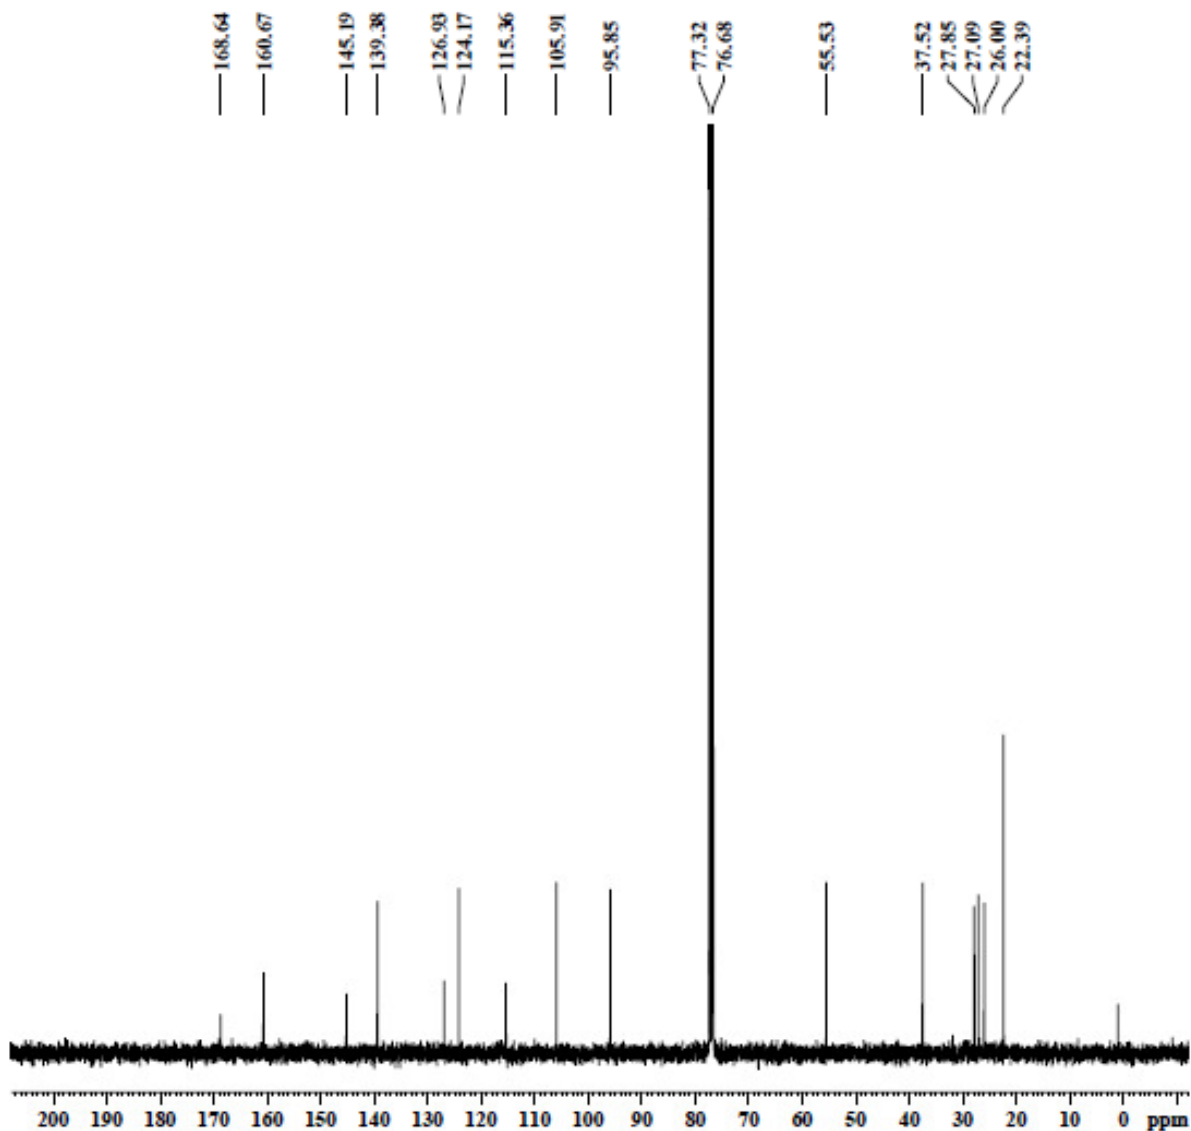

SKM-652  
13C, CDC13

Current Data Parameters  
NAME SKM-652, 13C, 400 MHz, 12 Sep, 2013, E  
EXPNO 30  
PROCNO 1

F2 - Acquisition Parameters  
Date\_ 20130913  
Time 13.22  
INSTRUM spect  
PROBHD 5 mm PABBO BB/  
PULPROG zgpg30  
TD 65536  
SOLVENT CDC13  
NS 512  
DS 4  
SWH 24038.461 Hz  
FIDRES 0.366795 Hz  
AQ 1.3631486 sec  
RG 201.68  
DW 23.800 usec  
DE 6.50 usec  
TE 300.0 K  
D1 2.0000000 sec  
D11 0.0300000 sec  
TD0 1

----- CHANNEL f1 -----  
SFO1 100.6304993 MHz  
NUC1 13C  
P1 8.20 usec  
PLW1 70.59999647 W

----- CHANNEL f2 -----  
SFO2 400.1621006 MHz  
NUC2 1H  
CPOPRG2 waltz16  
PCPD2 90.00 usec  
PLW2 14.0000000 W  
PLW12 0.28381999 W  
PLW13 0.21352000 W

F2 - Processing parameters  
SI 32768  
SF 100.6304336 MHz  
WDW EM  
SSB 0  
LB 1.00 Hz  
GB 0  
PC 1.40

<sup>13</sup>C -NMR Spectrum of 2c

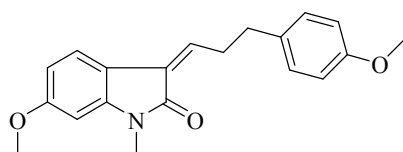

2d

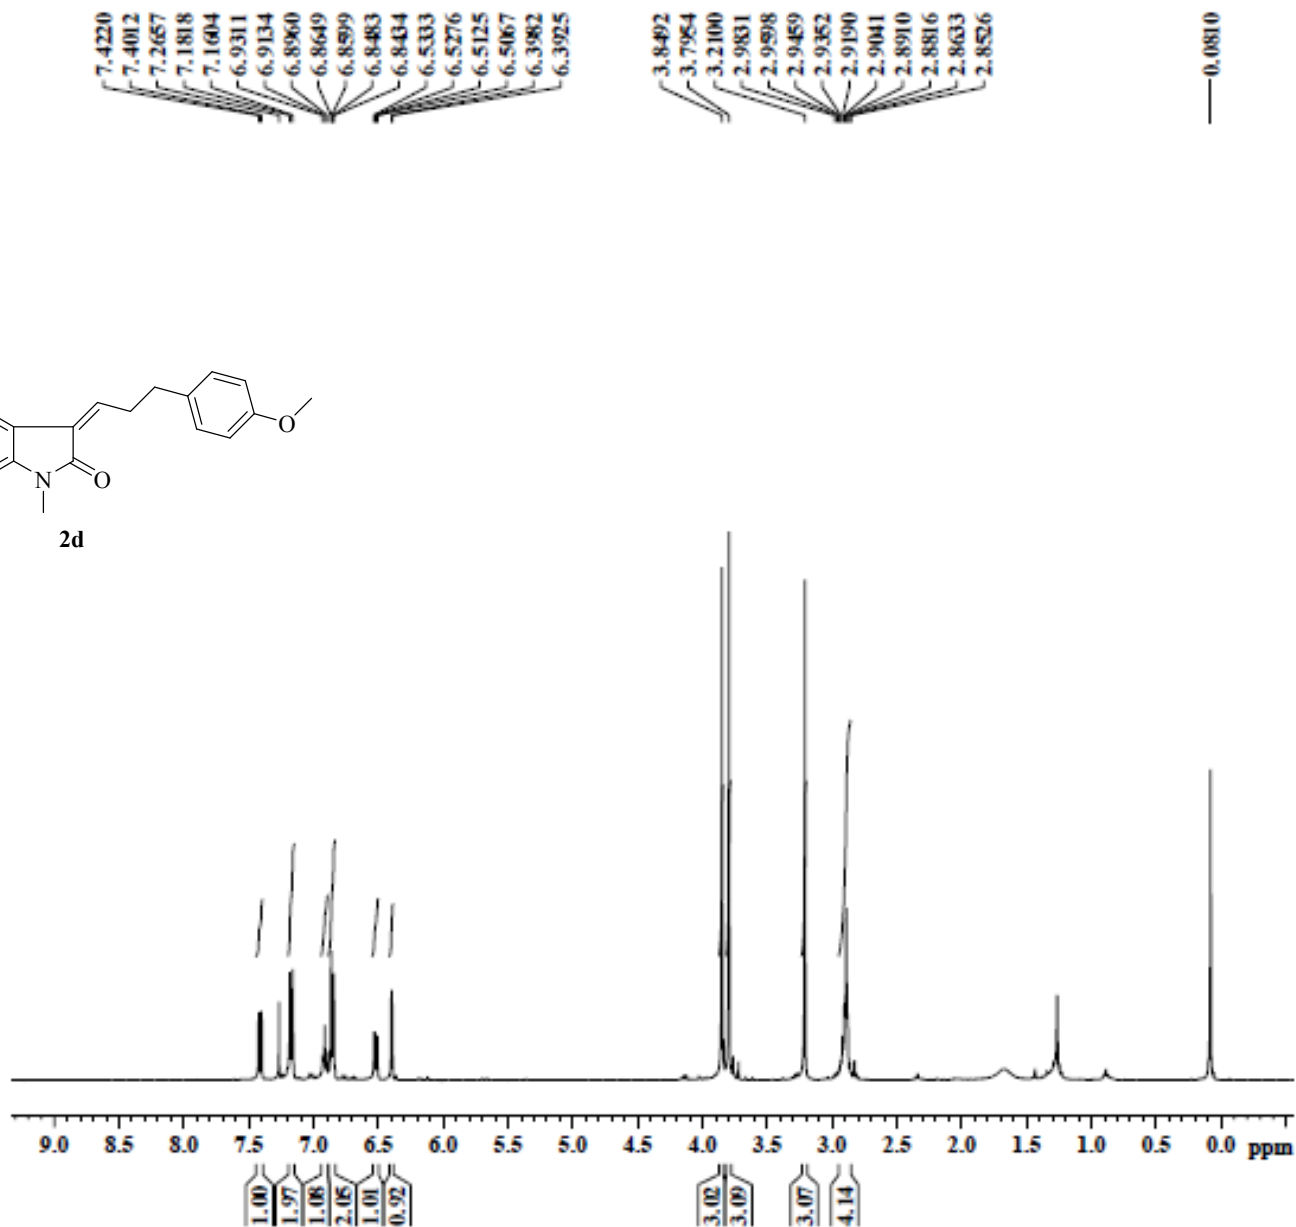

SKM-663  
1H, CDCl3

Current Data Parameters  
NAME SKM-663, 1H, 400 MHz, 19 Sep, 2013, M  
EXPNO 60  
PROCNO 1

F2 - Acquisition Parameters  
Date\_ 20130919  
Time 14.22  
INSTRUM spect  
PROBHD 5 mm PABBO BB1  
PULPROG zg30  
TD 65536  
SOLVENT CDCl3  
NS 8  
DS 0  
SWH 9615.385 Hz  
FIDRES 0.146719 Hz  
AQ 3.4078720 sec  
RG 80.54  
DW 62.000 usec  
DE 6.50 usec  
TE 300.0 K  
D1 1.00000000 sec  
TD0 1

----- CHANNEL f1 -----  
SFO1 400.1620712 MHz  
NUC1 1H  
P1 12.35 usec  
PLW1 14.00000000 W

F2 - Processing parameters  
SI 65536  
SF 400.1600000 MHz  
WDM EM  
SSB 0  
LB 0.30 Hz  
GB 0  
PC 1.00

<sup>1</sup>H -NMR Spectrum of 2d

SKM-663  
13C, CDC13

Current Data Parameters  
NAME SKM-663,13C,400 MHz,24 Sep,2013,E  
EXPNO 50  
PROCNO 1

F2 - Acquisition Parameters  
Date\_ 20130925  
Time 10.42  
INSTRUM spect  
PROBHD 5 mm PABBO BBI  
PULPROG zgpg30  
TD 65536  
SOLVENT CDC13  
NS 512  
DS 4  
SWH 24026.461 Hz  
FREQS 0.365736 Hz  
AQ 1.3631488 sec  
RG 201.48  
DW 20.800 usec  
DE 6.50 usec  
TE 300.0 K  
D1 2.0000000 sec  
D11 0.0300000 sec  
TD0 1

----- CHANNEL f1 -----  
SFO1 100.6204993 MHz  
NUC1 13C  
P1 8.25 usec  
PLW1 70.5000047 W

----- CHANNEL f2 -----  
SFO2 400.1621006 MHz  
NUC2 1H  
CPOPRG2 waltz16  
PCPD2 96.00 usec  
PLW2 14.0000000 W  
PLW12 0.26361999 W  
PLW13 0.21353000 W

F2 - Processing parameters  
SI 32768  
SF 100.6204418 MHz  
WDW EM  
SSB 0  
LB 1.00 Hz  
GB 0  
PC 1.40

168.49  
160.80  
158.08  
145.25  
137.60  
132.94  
129.23  
127.46  
124.27  
115.18  
113.99  
105.92  
95.87  
77.32  
77.00  
76.68  
55.51  
55.25  
33.81  
31.24  
25.99

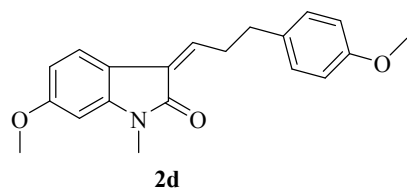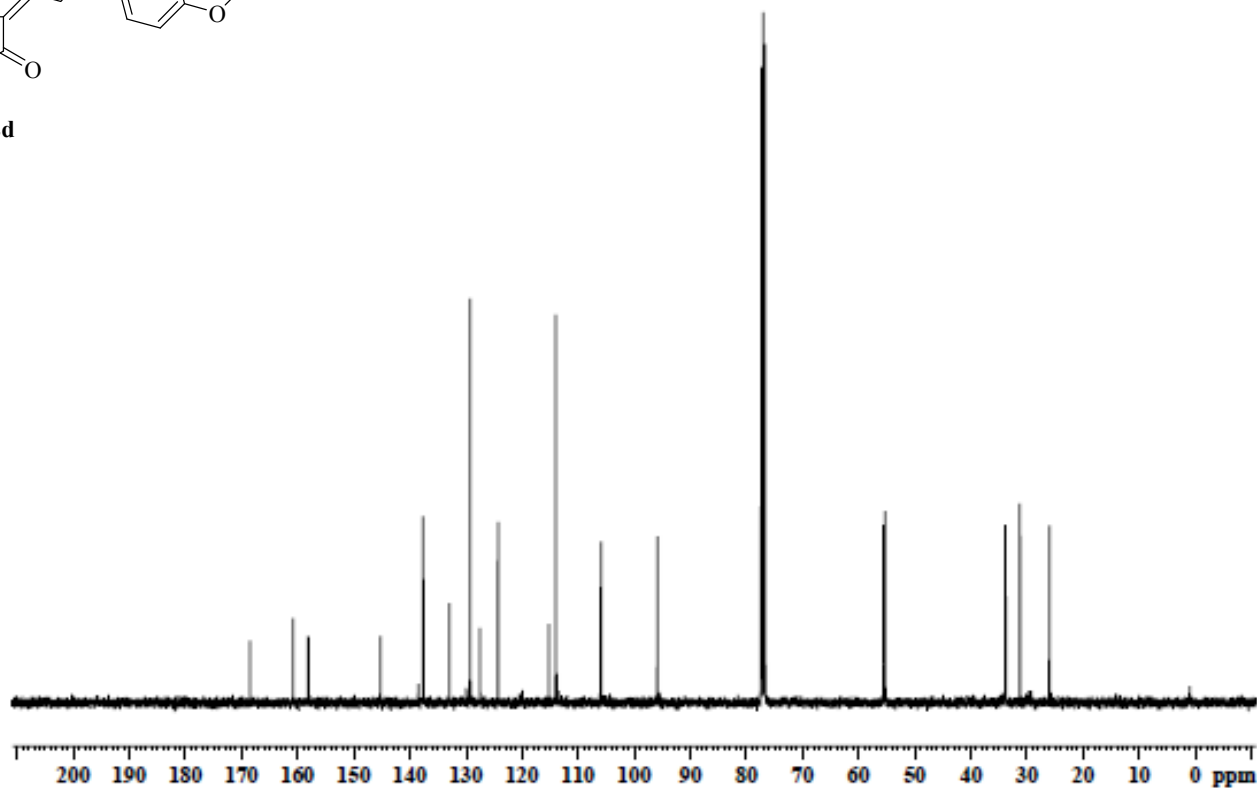

<sup>13</sup>C -NMR Spectrum of 2d

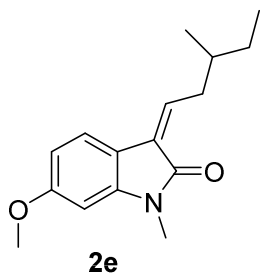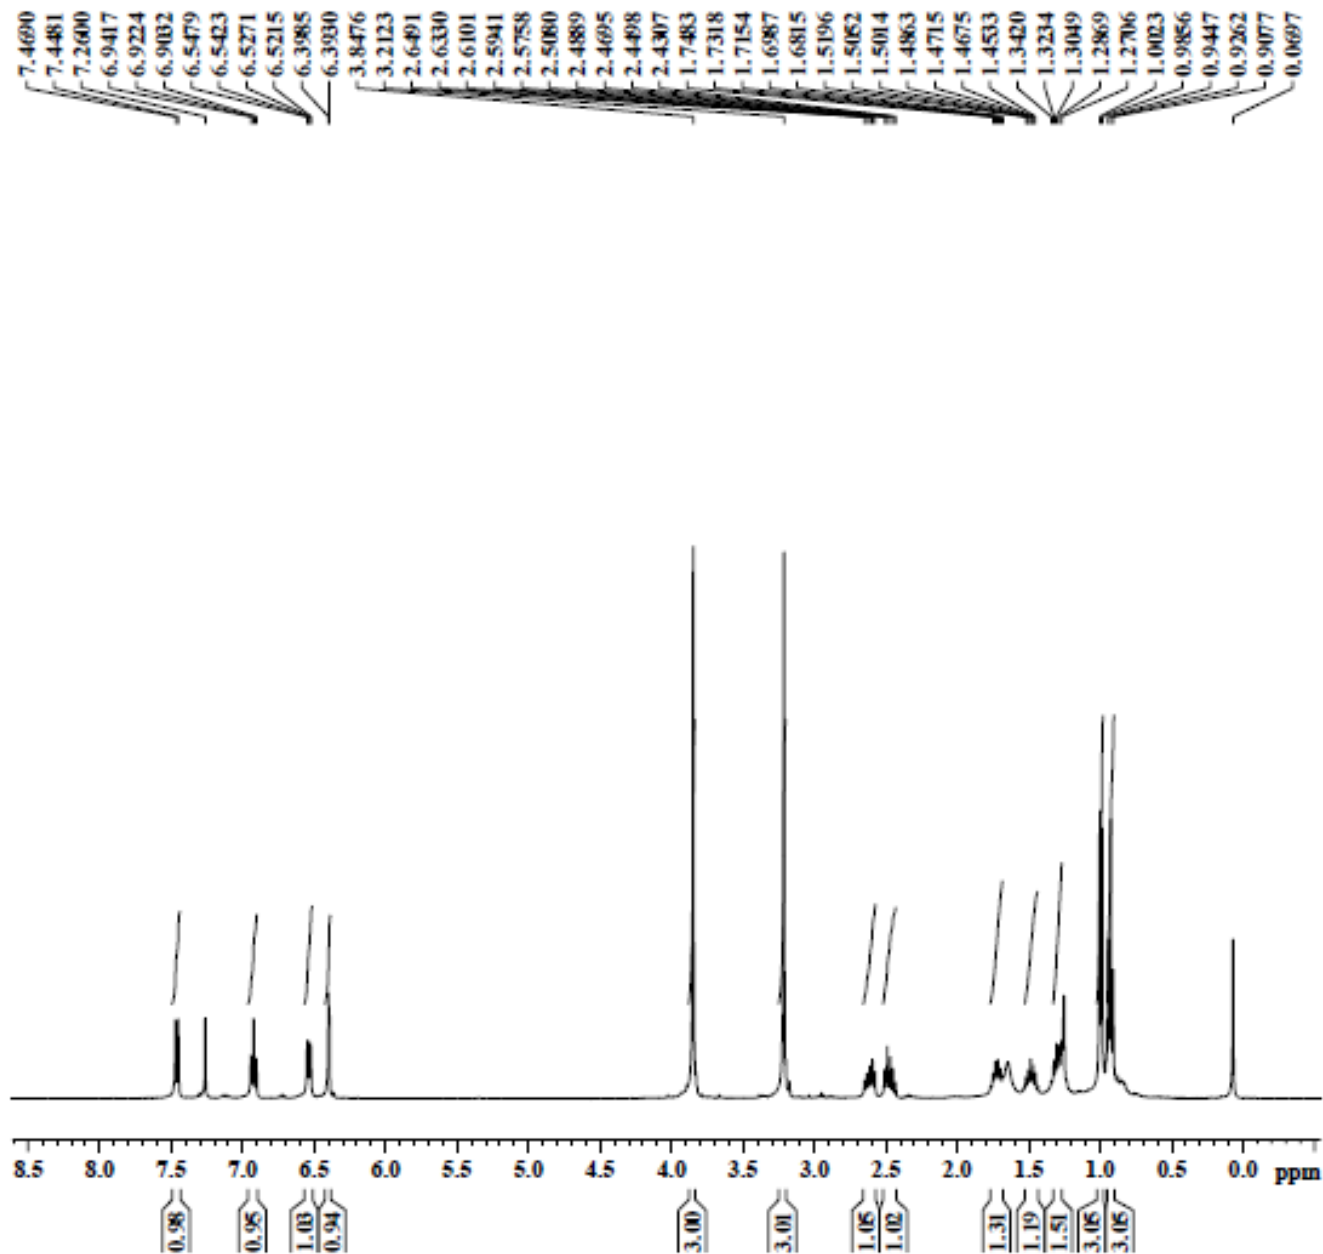

**SKM-671**  
**1H, CDC13**

Current Data Parameters  
NAME SKM-671,1H,400 MHz, 3 Oct,2013,M  
EXPNO 70  
PROCNO 1

F2 - Acquisition Parameters  
Date\_ 20131003  
Time 14.51  
INSTRUM spect  
PROBHD 5 mm PABBO BBI  
PULPROG zg30  
TD 65536  
SOLVENT CDC13  
NS 8  
DS 0  
SWH 9615.385 Hz  
FIDRES 0.148719 Hz  
AQ 1.4078220 sec  
RG 80.54  
DW 52.000 usec  
DE 6.50 usec  
TE 300.0 K  
D1 1.20000000 sec  
TD0 1

----- CHANNEL f1 -----  
SFO1 400.1629712 MHz  
NUC1 1H  
P1 12.35 usec  
PLW1 14.00000000 W

F2 - Processing parameters  
SI 65536  
SF 400.1605104 MHz  
WDW EM  
SSB 0  
LB 0.30 Hz  
GB 0  
PC 1.00

<sup>1</sup>H -NMR Spectrum of **2e**

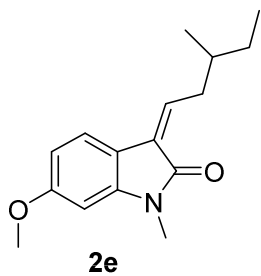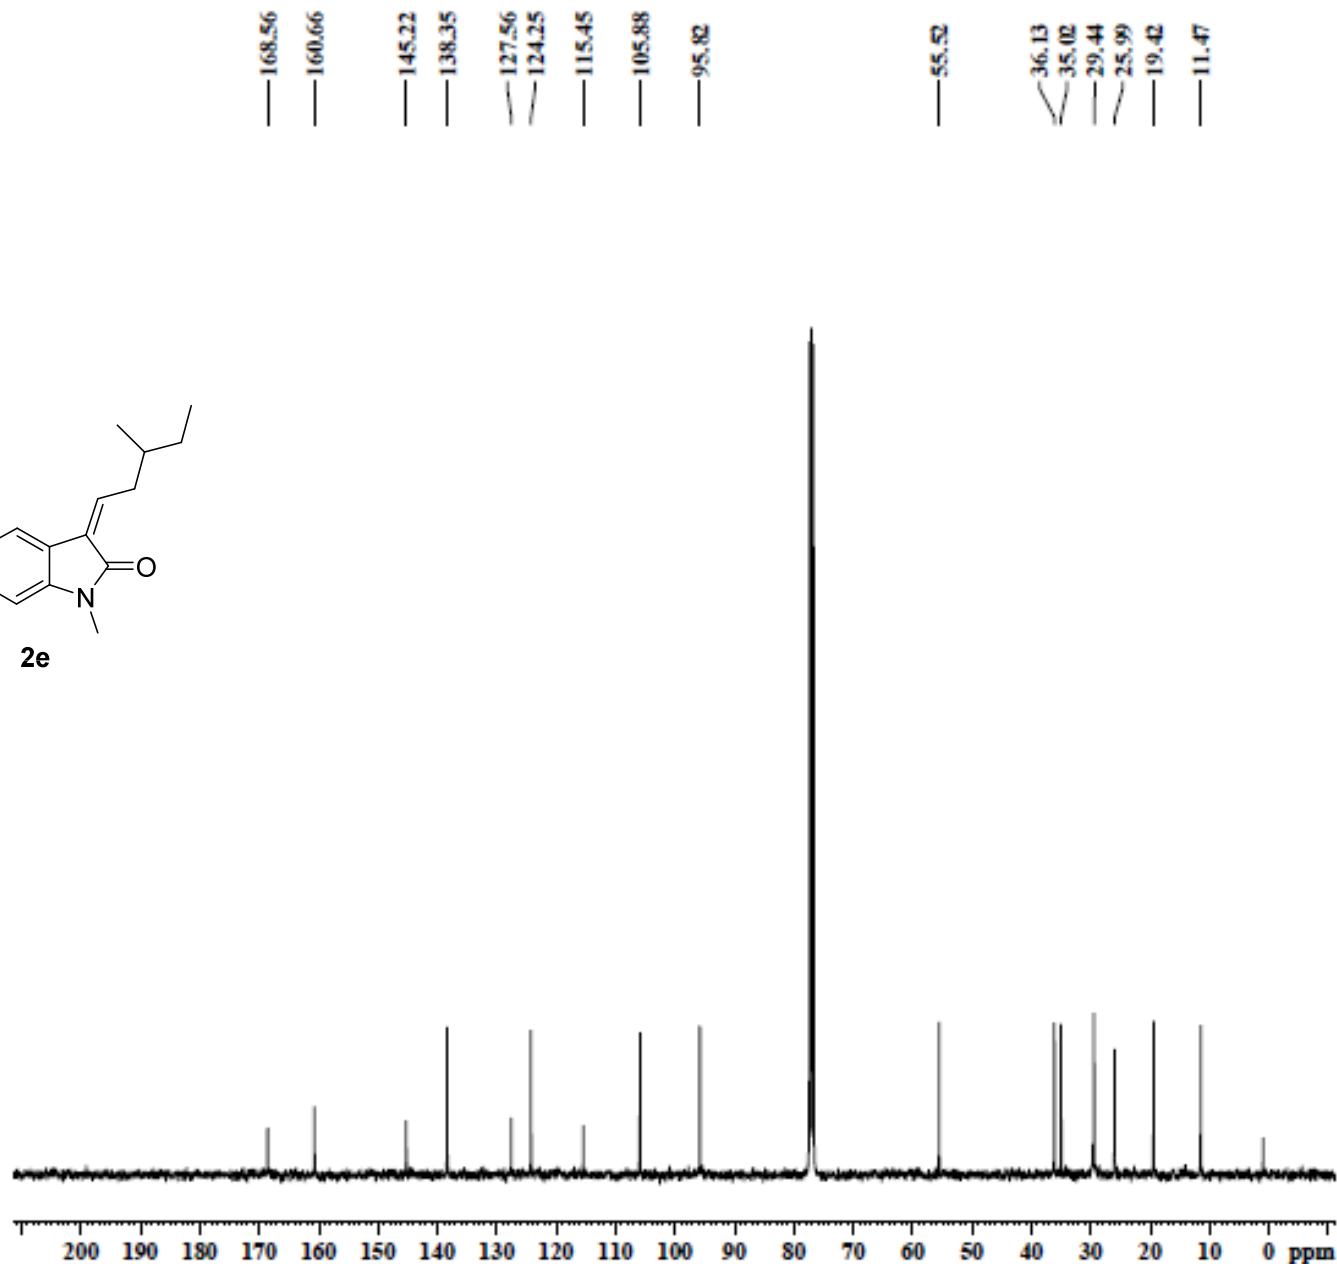

**SKM-677**  
**13C, CDCl3**

Current Data Parameters  
 NAME SKM-677\_13C\_400 MHz\_7 Oct\_2013.M  
 EXPNO 60  
 PROCNO 1

F2 - Acquisition Parameters  
 Date\_ 20131007  
 Time 23.06  
 INSTRUM spect  
 PROBHD 5 mm PABBO BB/  
 PULPROG zgpg30  
 TD 65536  
 SOLVENT CDCl3  
 NS 512  
 DS 0  
 SWH 24038.461 Hz  
 FIDRES 0.366798 Hz  
 AQ 1.3631488 sec  
 RG 201.48  
 DW 20.800 usec  
 DE 6.50 usec  
 TE 300.0 K  
 D1 2.0000000 sec  
 D11 0.03000000 sec  
 TD0 1

\*\*\*\*\* CHANNEL f1 \*\*\*\*\*  
 SFO1 100.6204993 MHz  
 NUC1 13C  
 P1 8.20 usec  
 PLW1 70.59999847 W

\*\*\*\*\* CHANNEL f2 \*\*\*\*\*  
 SFO2 400.1621006 MHz  
 NUC2 1H  
 CPDPRGf2 waltz16  
 PCPD2 90.00 usec  
 PLW2 14.00000000 W  
 PLW12 0.26361999 W  
 PLW13 0.21353000 W

F2 - Processing parameters  
 S 32768  
 SF 100.6204404 MHz  
 WDW EM  
 SSB 0  
 LB 3.00 Hz  
 GB 0  
 PC 1.40

<sup>13</sup>C -NMR Spectrum of **2e**

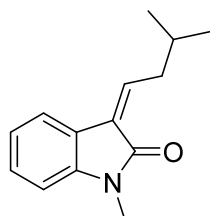

**2f**

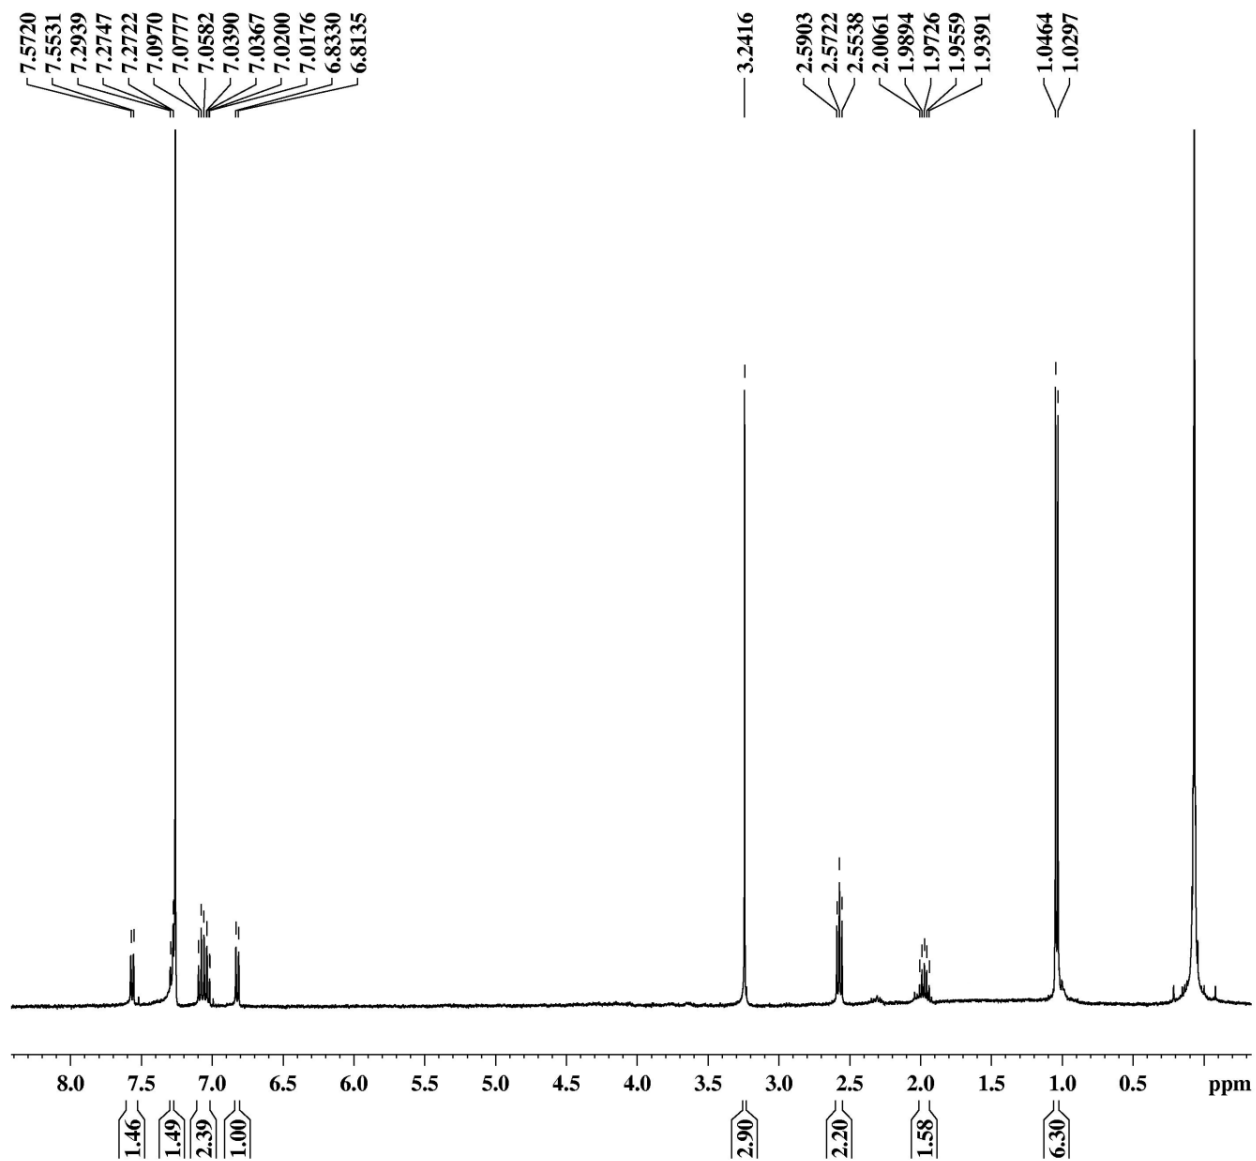

SLK-389  
1H, CDCl3

Current Data Parameters  
NAME slk-389N  
EXPNO 40  
PROCNO 1

F2 - Acquisition Parameters  
Date\_ 20160513  
Time 7.46  
INSTRUM spect  
PROBHD 5 mm PABBO BB/  
PULPROG zg30  
TD 65536  
SOLVENT CDCl3  
NS 8  
DS 0  
SWH 8012.820 Hz  
FIDRES 0.122266 Hz  
AQ 4.0894465 sec  
RG 179.93  
DW 62.400 usec  
DE 6.50 usec  
TE 300.0 K  
D1 1.00000000 sec  
TD0 1

===== CHANNEL f1 =====  
SFO1 400.1629712 MHz  
NUC1 1H  
P1 13.20 usec  
PLW1 13.00000000 W

F2 - Processing parameters  
SI 65536  
SF 400.1605108 MHz  
WDW EM  
SSB 0  
LB 0.30 Hz  
GB 0  
PC 1.00

<sup>1</sup>H -NMR Spectrum of **2f**



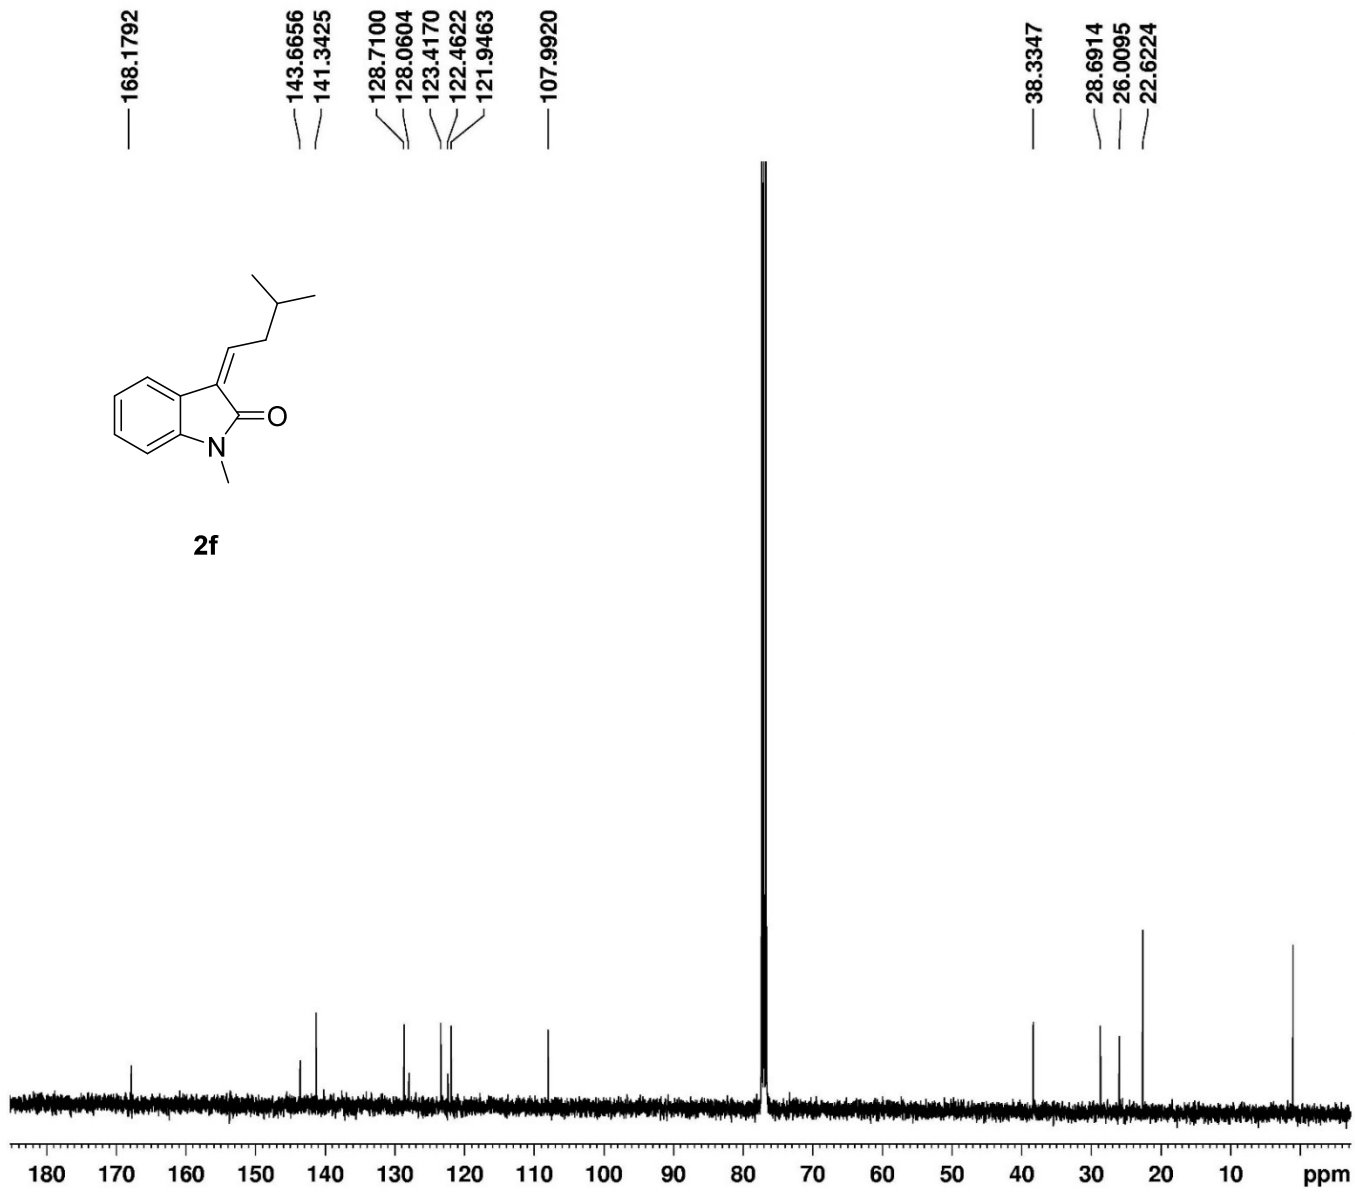

SLK-389  
13C, CDC13

Current Data Parameters  
NAME SLK-389  
EXPNO 50  
PROCNO 1

F2 - Acquisition Parameters  
Date\_ 20170106  
Time 0.23  
INSTRUM spect  
PROBHD 5 mm FAPBO BB/  
PULPROG zgpg30  
TD 65536  
SOLVENT CDCl3  
NS 1024  
DS 4  
SWH 24038.461 Hz  
FIDRES 0.366798 Hz  
AQ 1.3631488 sec  
RG 201.48  
DW 20.800 usec  
DE 6.50 usec  
TE 296.7 K  
D1 2.0000000 sec  
D11 0.0300000 sec  
TD0 1

==== CHANNEL f1 ====  
SFO1 100.6304993 MHz  
NUC1 13C  
P1 9.90 usec  
PLW1 53.00000000 W

==== CHANNEL f2 ====  
SFO2 400.1621006 MHz  
NUC2 1H  
CPDPRG2 waltz16  
PCPD2 90.00 usec  
PLW2 13.00000000 W  
PLW12 0.27963999 W  
PLW13 0.22651000 W

F2 - Processing parameters  
SI 32768  
SF 100.6204380 MHz  
WDW EM  
SSB 0  
LB 1.00 Hz  
GB 0  
PC 1.40

<sup>13</sup>C -NMR Spectrum of **2f**

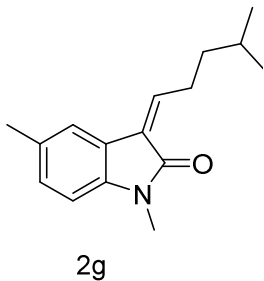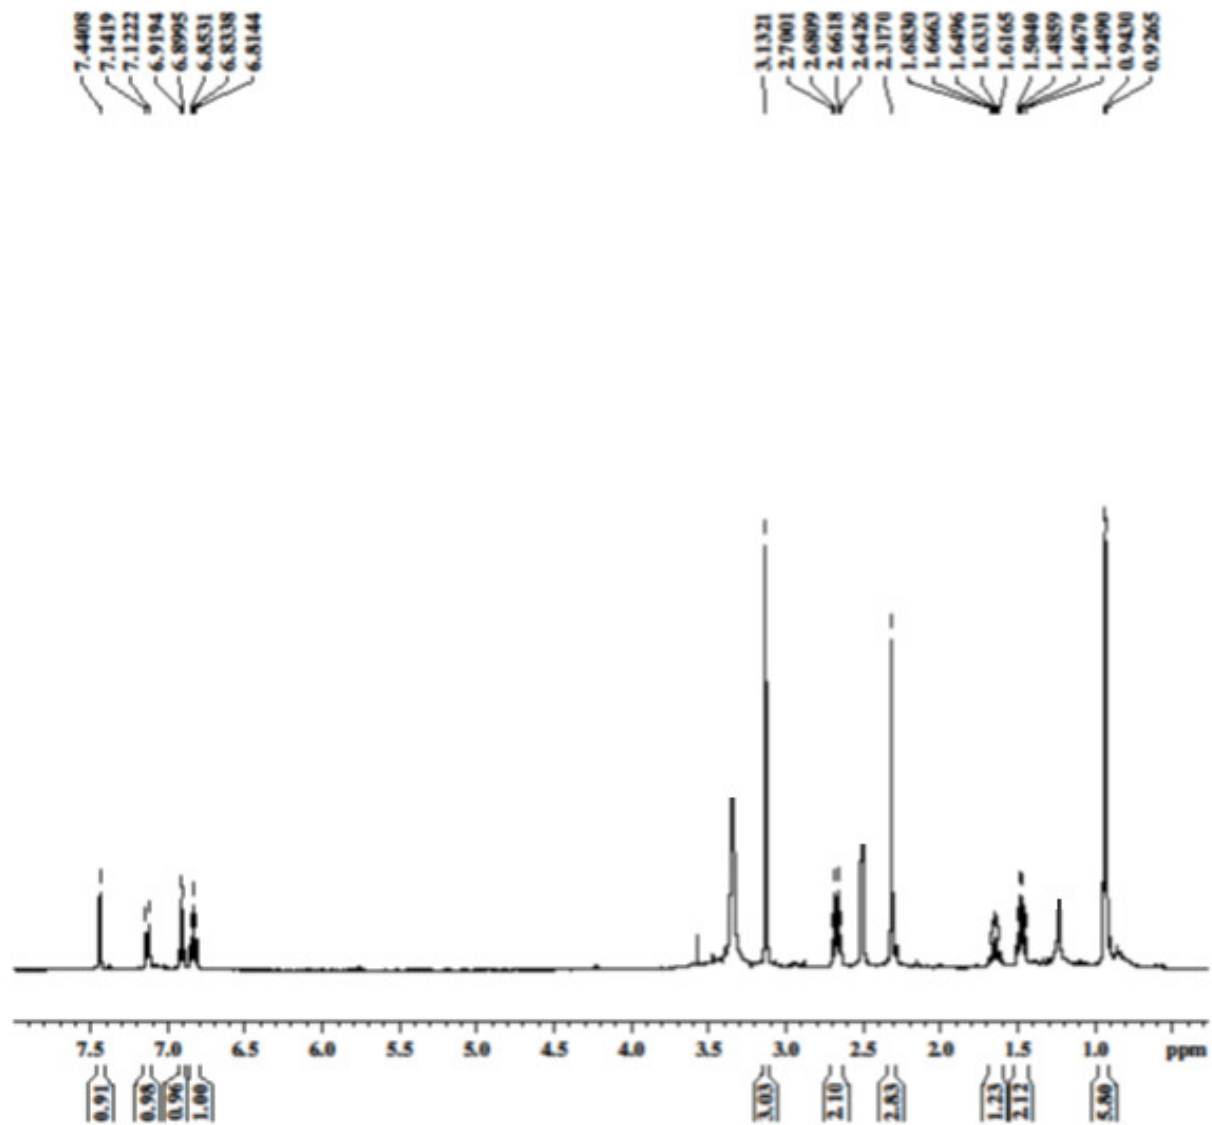

SLK-372  
1H, DMSO

Current Data Parameters  
NAME SLK-372  
EXPRO 70  
PROCNO 1

F2 - Acquisition Parameters  
Date\_ 20180329  
Time 16.45  
INSTRUM spect  
PROBHD 5 mm PABBO BB  
PULPROG zg30  
TD 65536  
SOLVENT DMSO  
NS 32  
DS 0  
SWH 9615.395 Hz  
FIDRES 0.148719 Hz  
AQ 3.4078720 sec  
RG 114.26  
DW 52.000 usec  
DE 6.50 usec  
TE 295.8 K  
D1 1.00000000 sec  
TDD 1

===== CHANNEL f1 =====  
SFO1 400.1629712 MHz  
NUC1 1H  
P1 13.20 usec  
PLW1 13.00000000 W

F2 - Processing parameters  
SI 65536  
SF 400.1605000 MHz  
WOW EM  
SGB 0  
LB 0.30 Hz  
GB 0  
PC 1.00

<sup>1</sup>H -NMR Spectrum of 2g

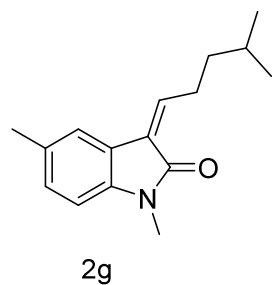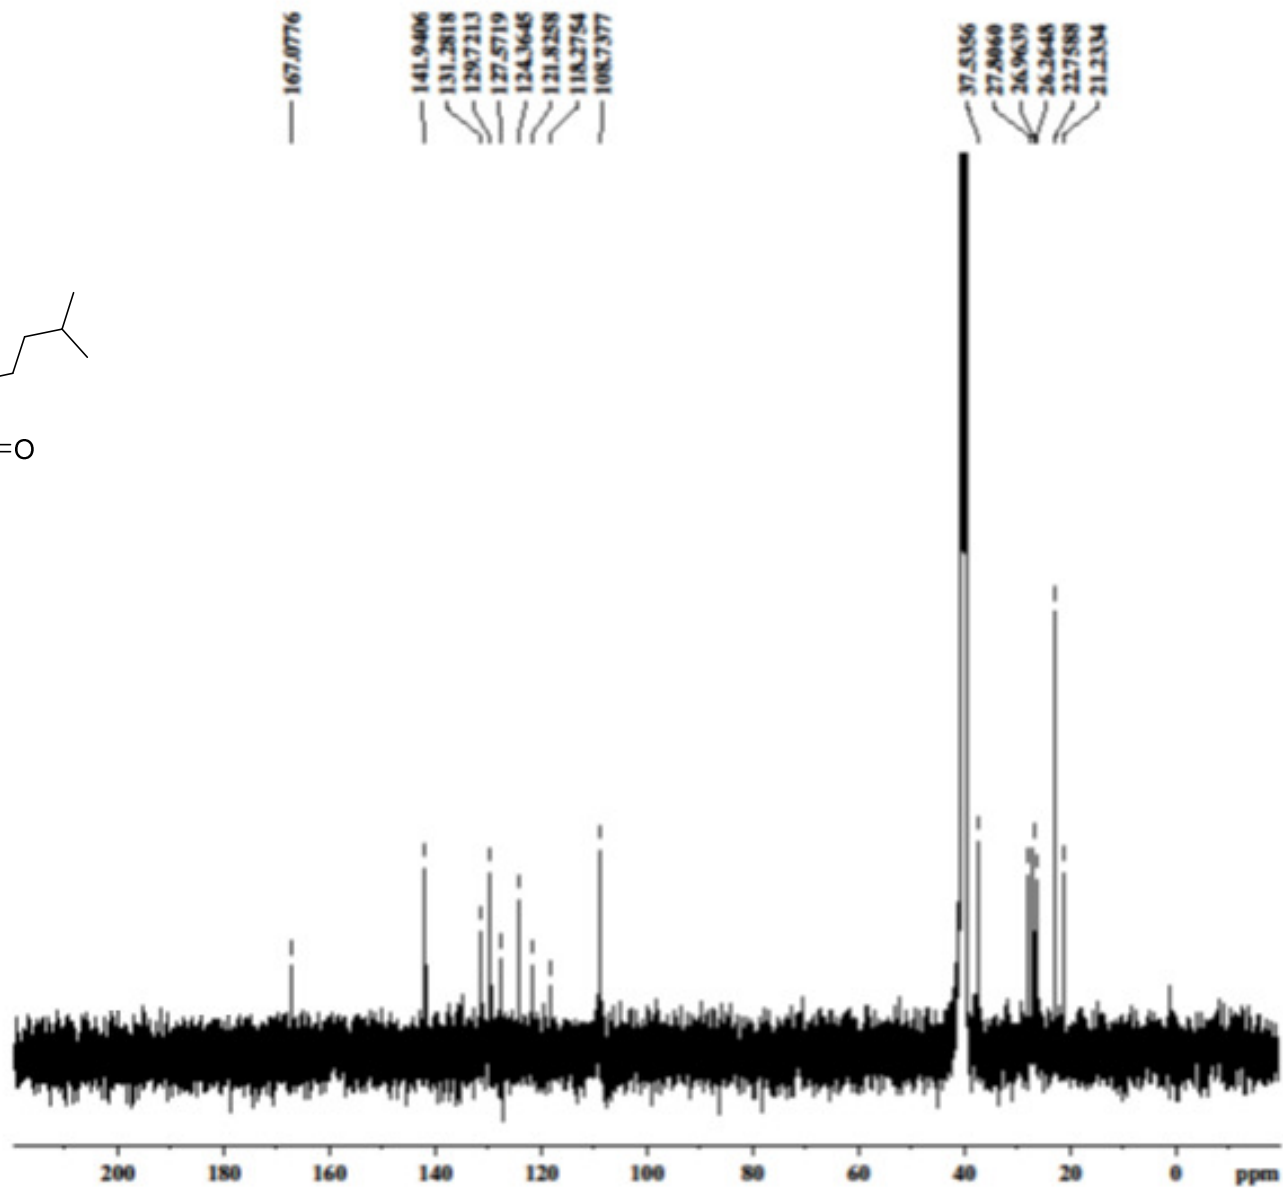

SLK-372  
13C, CDC13

Current Data Parameters  
NAME SLK-372  
EXPNO 10  
PROCNO 1

F2 - Acquisition Parameters  
Date\_ 20160403  
Time 1.54  
INSTRUM spect  
PROBHD 5 mm PA180 8H  
PULPROG zgpg30  
TD 65536  
SOLVENT DMSO  
NS 1024  
DS 0  
SWH 24038.461 Hz  
FIDRES 0.396798 Hz  
AQ 1.2621488 sec  
RG 301.48  
DW 20.800 usec  
DE 6.50 usec  
TE 300.2 K  
D1 2.0000000 sec  
D11 0.0300000 sec  
TD0 1

===== CHANNEL f1 =====  
SFO1 100.6204280 MHz  
NUC1 13C  
P1 9.90 usec  
PLW1 53.0000000 W

===== CHANNEL f2 =====  
SFO2 400.1521006 MHz  
NUC2 1H  
CPOPRG2 waltz16  
PCPD2 90.00 usec  
PLW2 13.0000000 W  
PLW12 0.27963960 W  
PLW13 0.20651000 W

F2 - Processing parameters  
SI 32768  
SF 100.6204280 MHz  
WDW EM  
SSB 0  
LB 1.00 Hz  
GB 0  
PC 1.40

$^{13}\text{C}$  -NMR Spectrum of **2g**

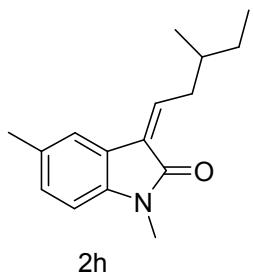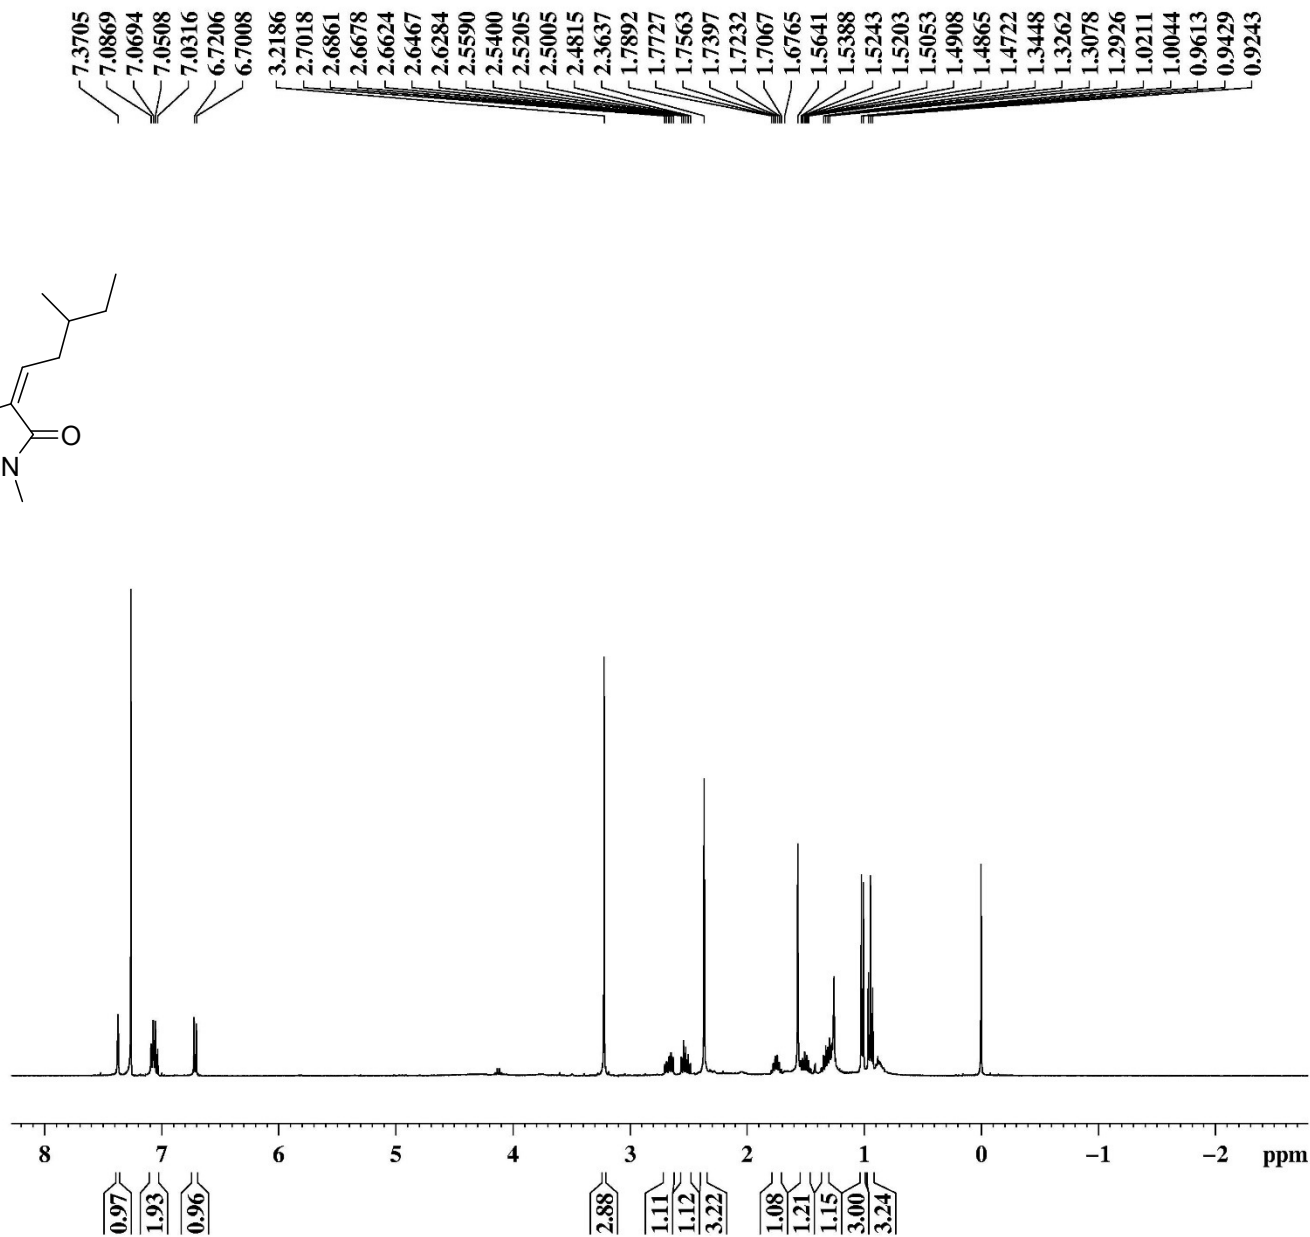

SLK-375  
1H, CDCl3

Current Data Parameters  
NAME slk-375  
EXPNO 160  
PROCNO 1

F2 - Acquisition Parameters  
Date\_ 20160412  
Time 3.27  
INSTRUM spect  
PROBHD 5 mm PABBO BB/  
PULPROG zg30  
TD 65536  
SOLVENT CDCl3  
NS 8  
DS 0  
SWH 9615.385 Hz  
FIDRES 0.146719 Hz  
AQ 3.4078720 sec  
RG 129.57  
DW 52.000 usec  
DE 6.50 usec  
TE 300.0 K  
D1 1.00000000 sec  
TD0 1

===== CHANNEL f1 =====  
SFO1 400.1629712 MHz  
NUC1 1H  
P1 13.20 usec  
PLW1 13.00000000 W

F2 - Processing parameters  
SI 65536  
SF 400.1605099 MHz  
WDW EM  
SSB 0  
LB 0.30 Hz  
GB 0  
PC 1.00

<sup>1</sup>H -NMR Spectrum of 2h

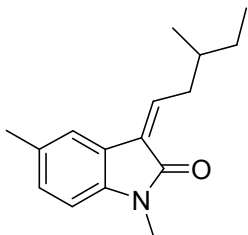

2h

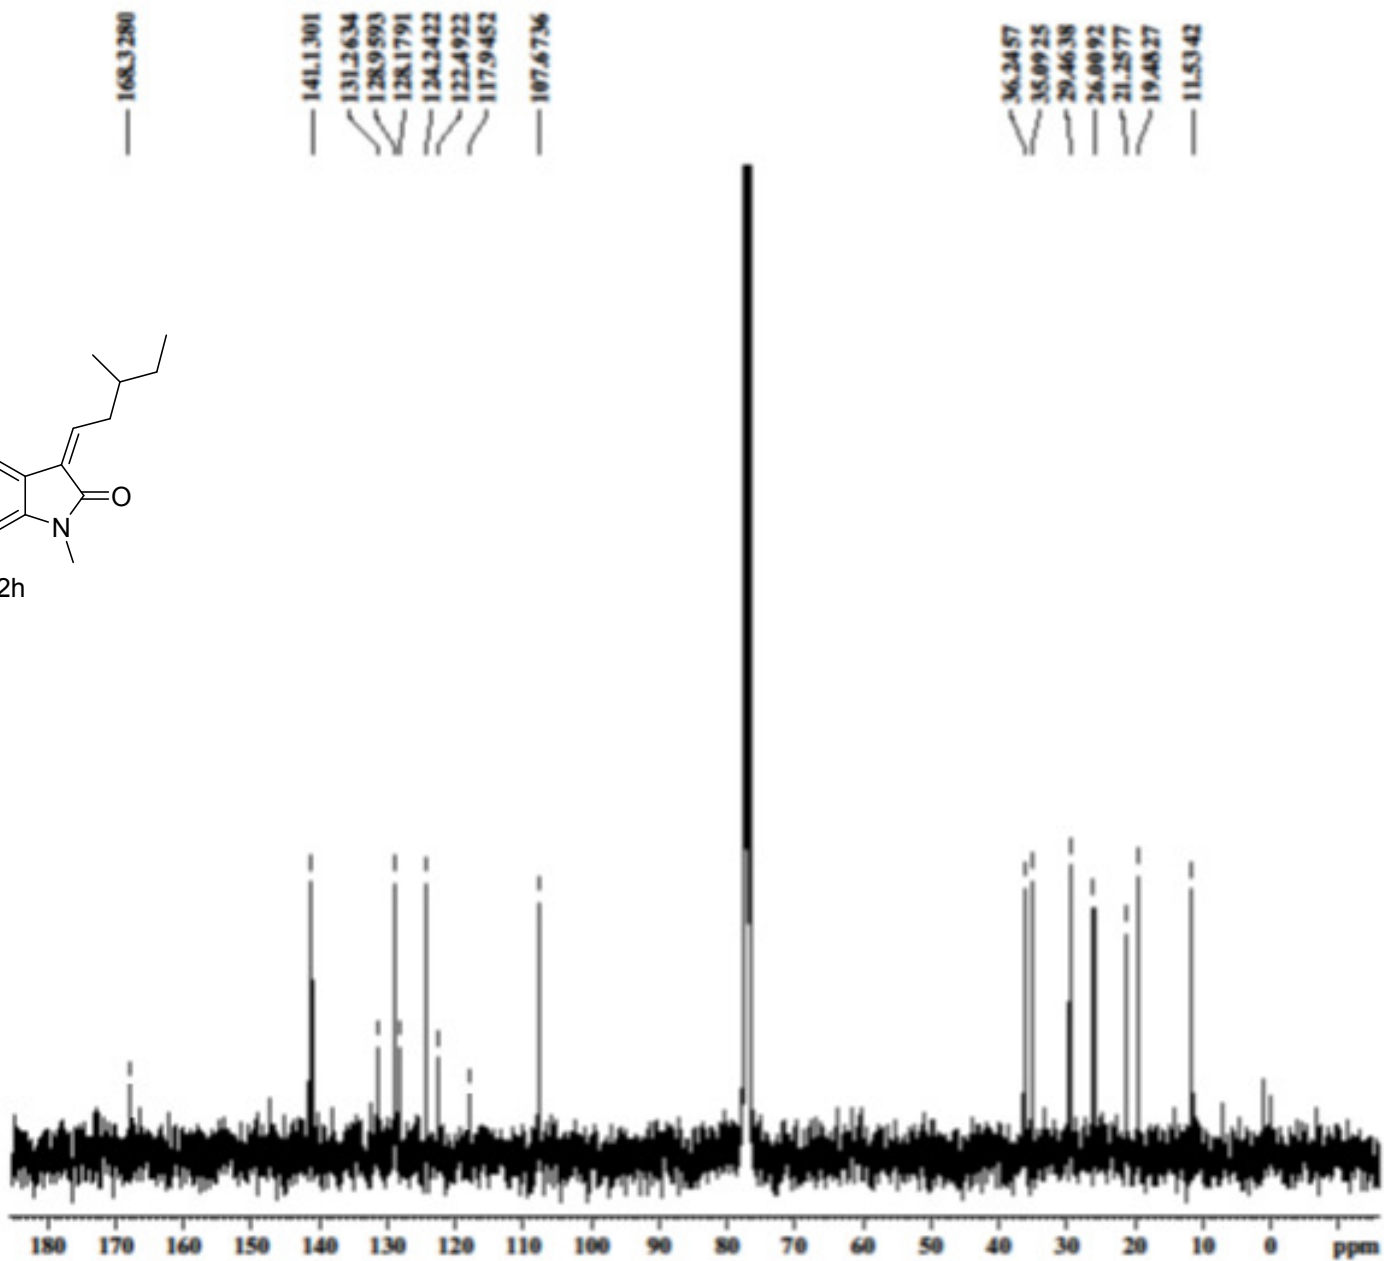

SLK-375  
13C, CDC13

Current Data Parameters  
NAME SLK-375  
EXPNO 80  
PROCNO 1

F2 - Acquisition Parameters  
Date\_ 20160426  
Time 17.03  
INSTRUM spect  
PROBHD 5 mm PABBO BB  
PULPROG zgpg30  
TD 65536  
SOLVENT CDCl3  
NS 512  
DS 0  
SWH 24038.461 Hz  
FIDRES 0.366796 Hz  
AQ 1.2621466 sec  
RG 201.48  
DW 20.800 usec  
DE 6.50 usec  
TE 300.2 K  
D1 2.00000000 sec  
D11 0.03000000 sec  
TD0 1

===== CHANNEL f1 =====  
SFO1 100.6264993 MHz  
NUC1 13C  
P1 9.90 usec  
PLW1 52.00000000 W

===== CHANNEL f2 =====  
SFO2 400.1621006 MHz  
NUC2 1H  
CPOPRG2 waltz16  
PCPD2 90.00 usec  
PLW2 13.00000000 W  
PLW12 0.27363999 W  
PLW13 0.22651000 W

F2 - Processing parameters  
SI 32768  
SF 100.6264380 MHz  
WCM EM  
SSB 0  
LB 3.00 Hz  
GB 0  
PC 1.40

<sup>13</sup>C -NMR Spectrum of 2h

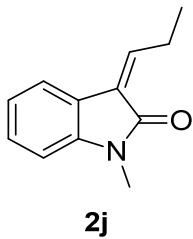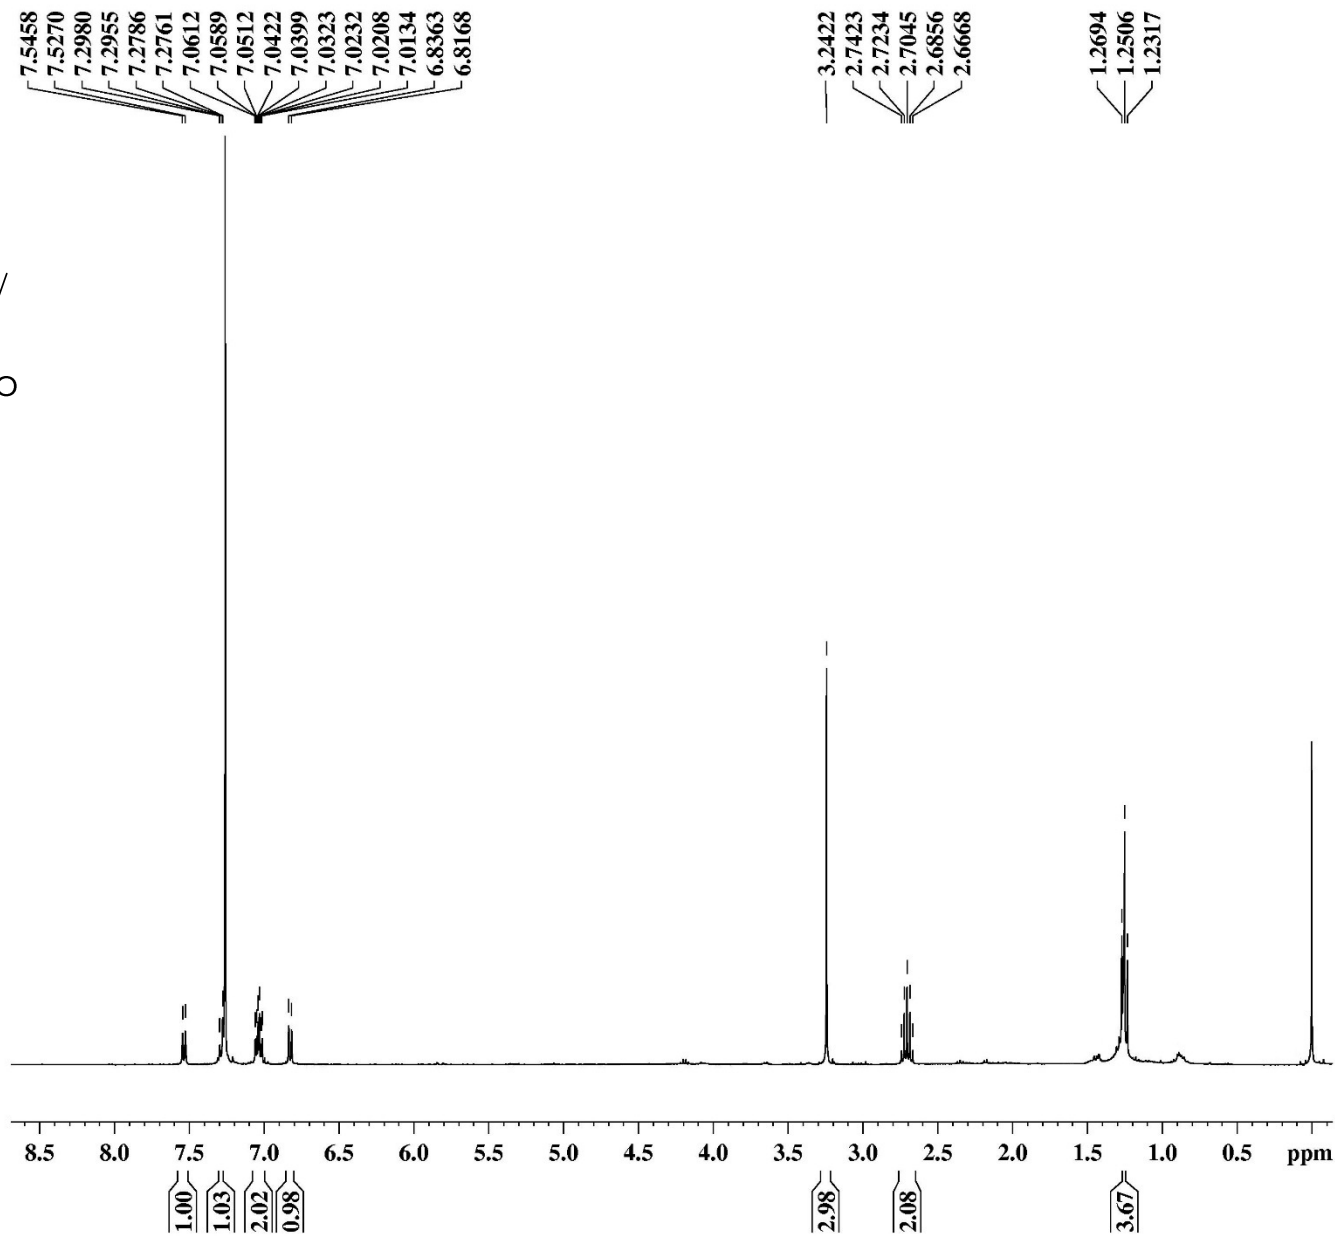

SLK-285  
1H, CDCl3

Current Data Parameters  
NAME slk-285  
EXPNO 30  
PROCNO 1

F2 - Acquisition Parameters  
Date\_ 20160805  
Time 14.03  
INSTRUM spect  
PROBHD 5 mm PABBO BB/  
PULPROG zg30  
TD 65536  
SOLVENT CDCl3  
NS 64  
DS 0  
SWH 9615.385 Hz  
FIDRES 0.146719 Hz  
AQ 3.4078720 sec  
RG 159.22  
DW 52.000 usec  
DE 6.50 usec  
TE 300.0 K  
D1 1.00000000 sec  
TD0 1

===== CHANNEL f1 =====  
SFO1 400.1629712 MHz  
NUC1 1H  
P1 13.20 usec  
PLW1 13.00000000 W

F2 - Processing parameters  
SI 65536  
SF 400.1605096 MHz  
WDW EM  
SSB 0  
LB 0.30 Hz  
GB 0  
PC 1.00

<sup>1</sup>H -NMR Spectrum of 2j

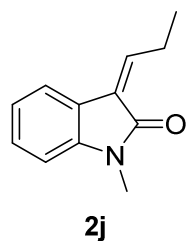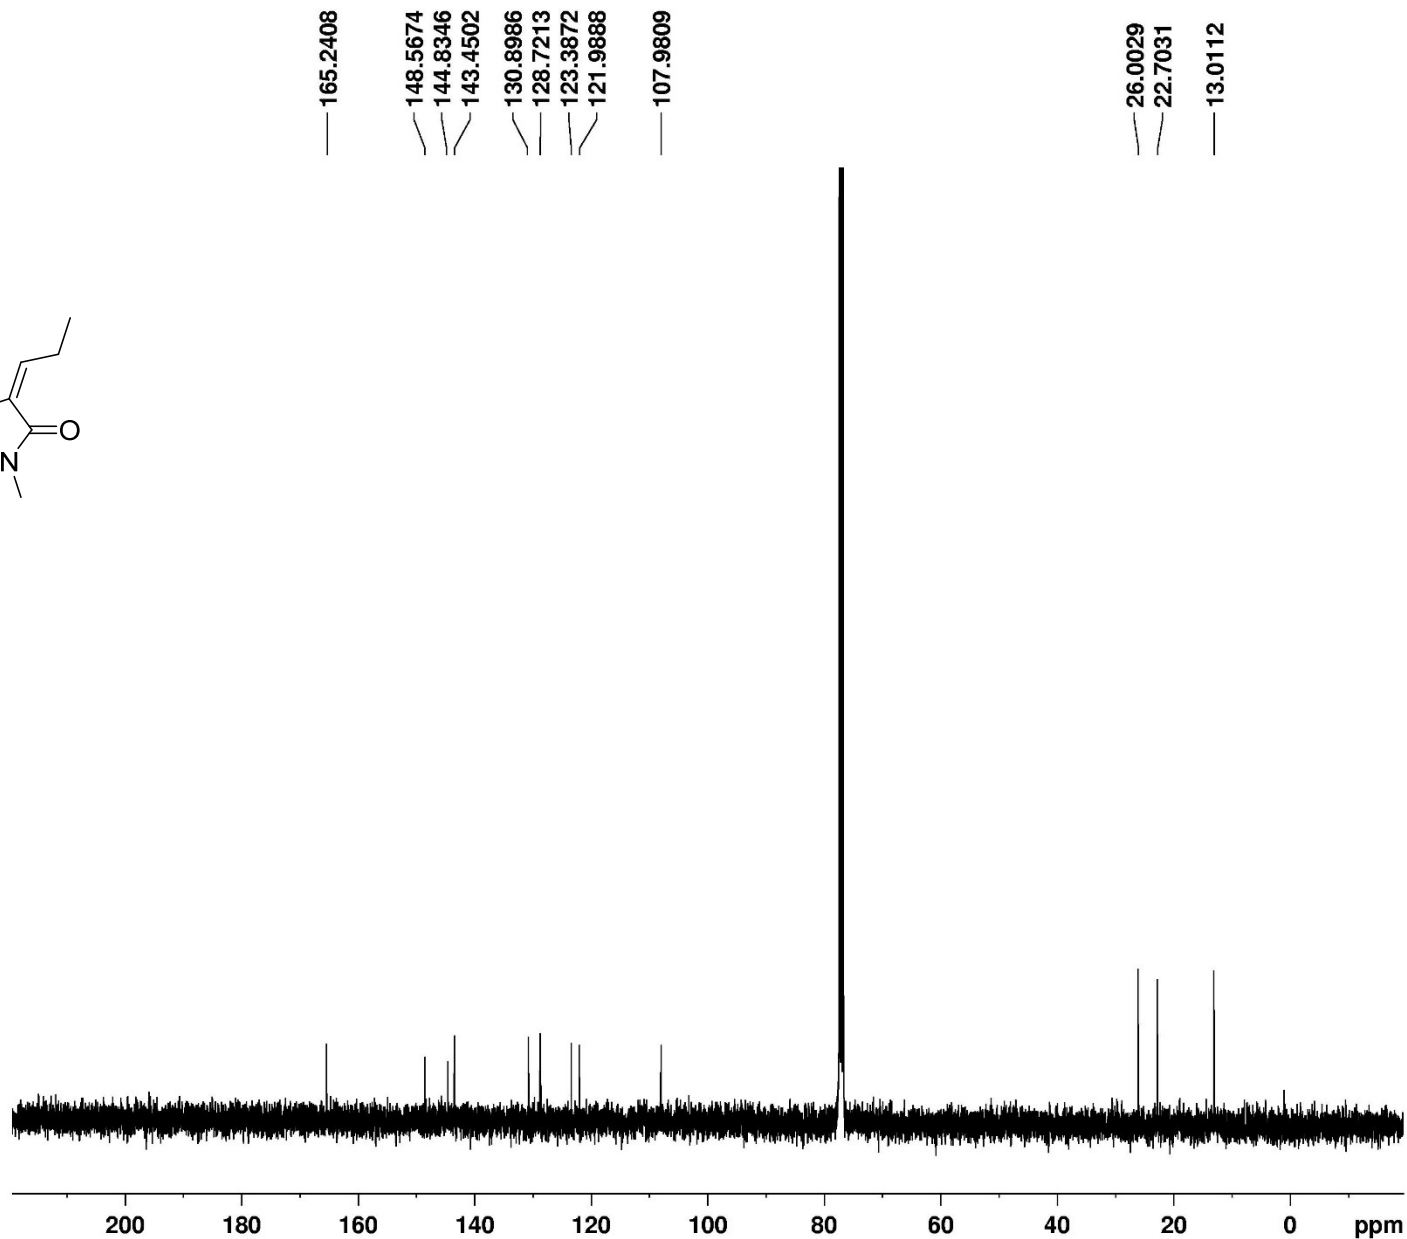

SLK-285  
13C, CDCl<sub>3</sub>

Current Data Parameters  
NAME synergy  
EXPNO 70  
PROCNO 1

F2 - Acquisition Parameters  
Date\_ 20160807  
Time 12.33  
INSTRUM spect  
PROBHD 5 mm PABBO BB/  
PULPROG zgpg30  
TD 65536  
SOLVENT CDCl<sub>3</sub>  
NS 512  
DS 0  
SWH 24038.461 Hz  
FIDRES 0.366798 Hz  
AQ 1.3631488 sec  
RG 201.48  
DW 20.800 usec  
DE 6.50 usec  
TE 301.4 K  
D1 2.0000000 sec  
D11 0.0300000 sec  
TD0 1

==== CHANNEL f1 ====  
SFO1 100.6304993 MHz  
NUC1 13C  
P1 9.90 usec  
PLW1 53.0000000 W

==== CHANNEL f2 ====  
SFO2 400.1621006 MHz  
NUC2 1H  
CPDPRG[2] waltz16  
PCPD2 90.00 usec  
PLW2 13.0000000 W  
PLW12 0.27963999 W  
PLW13 0.22651000 W

F2 - Processing parameters  
SI 32768  
SF 100.6204380 MHz  
WDW EM  
SSB 0  
LB 1.00 Hz  
GB 0  
PC 1.40

<sup>13</sup>C-NMR Spectrum of **2j**

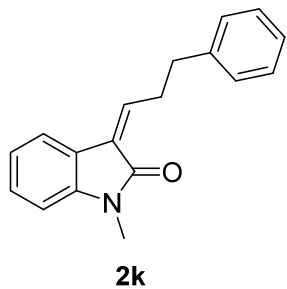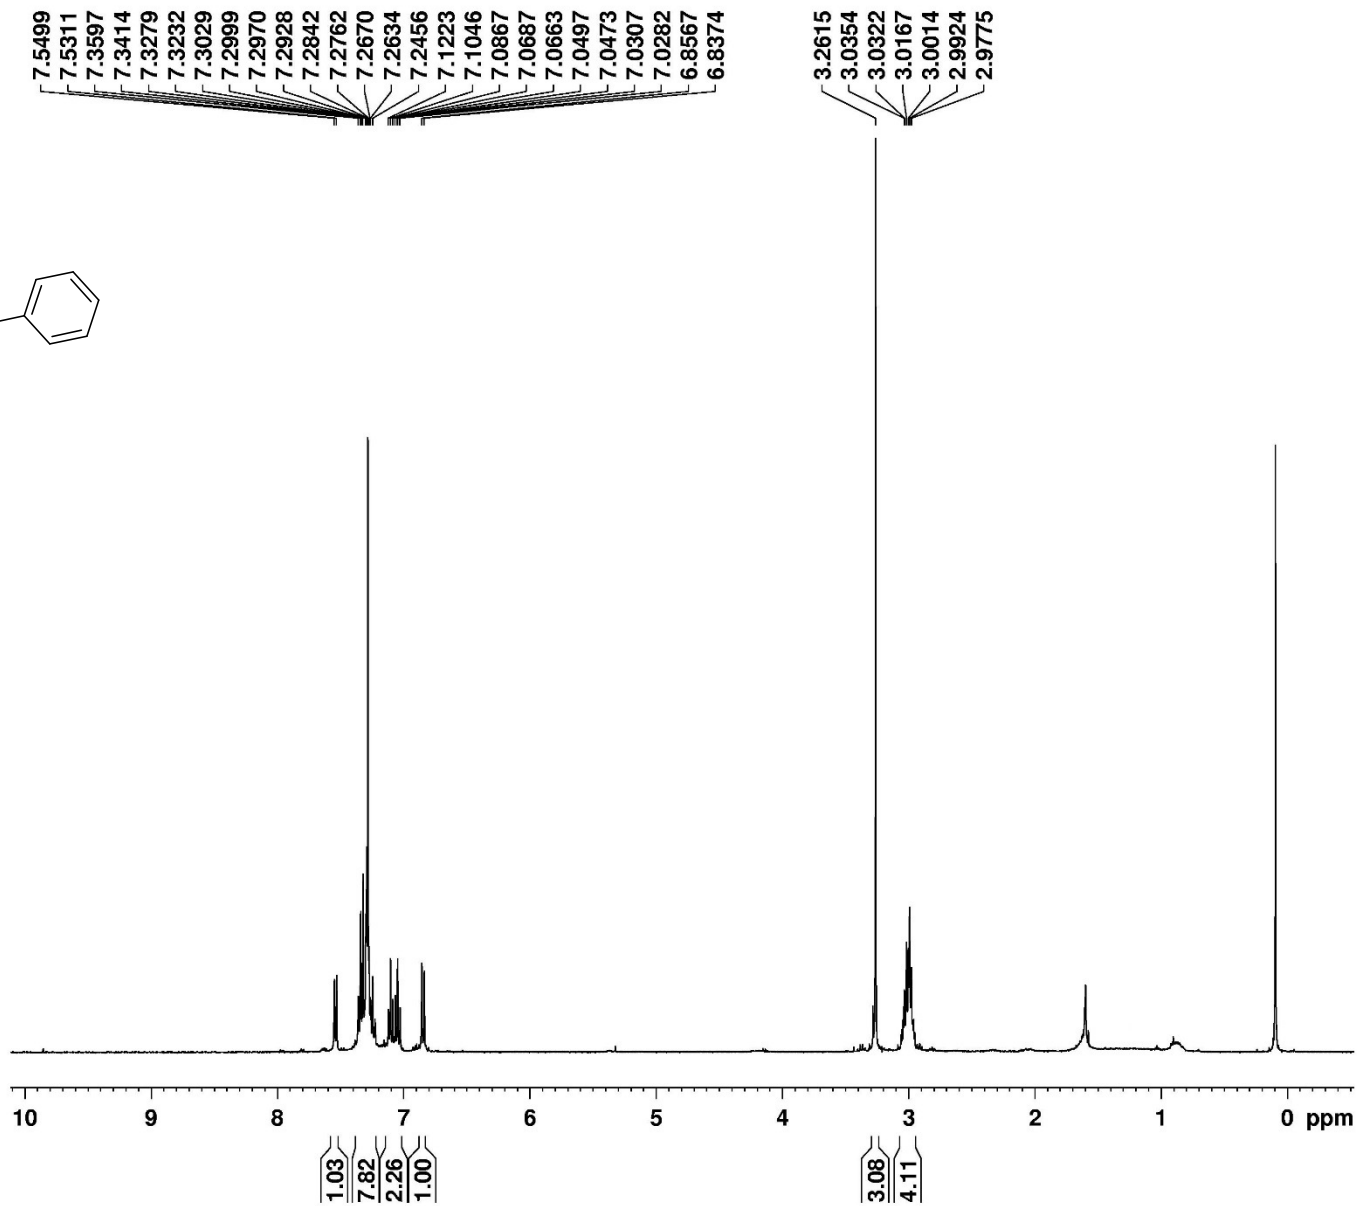

SLK-497  
1H, CDCl3

Current Data Parameters  
NAME SLK-497F  
EXPNO 80  
PROCNO 1

F2 - Acquisition Parameters  
Date 20170105  
Time 18.28  
INSTRUM spect  
PROBHD 5 mm PABBO BB/  
PULPROG zg30  
TD 65536  
SOLVENT CDCl3  
NS 8  
DS 0  
SWH 801.820 Hz  
FIDRES 0.122266 Hz  
AQ 4.0894465 sec  
RG 159.22  
DW 62.400 usec  
DE 6.50 usec  
TE 295.5 K  
D1 1.00000000 sec  
TD0 1

==== CHANNEL f1 ====  
SFO1 400.1629712 MHz  
NUC1 1H  
P1 13.20 usec  
PLW1 13.00000000 W

F2 - Processing parameters  
SI 65536  
SF 400.1605000 MHz  
WDW EM  
SSB 0  
LB 0.30 Hz  
GB 0  
PC 1.00

<sup>1</sup>H -NMR Spectrum of 2k



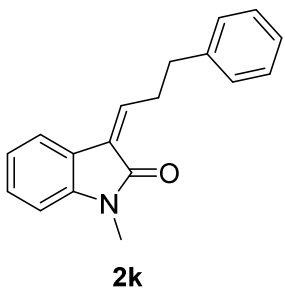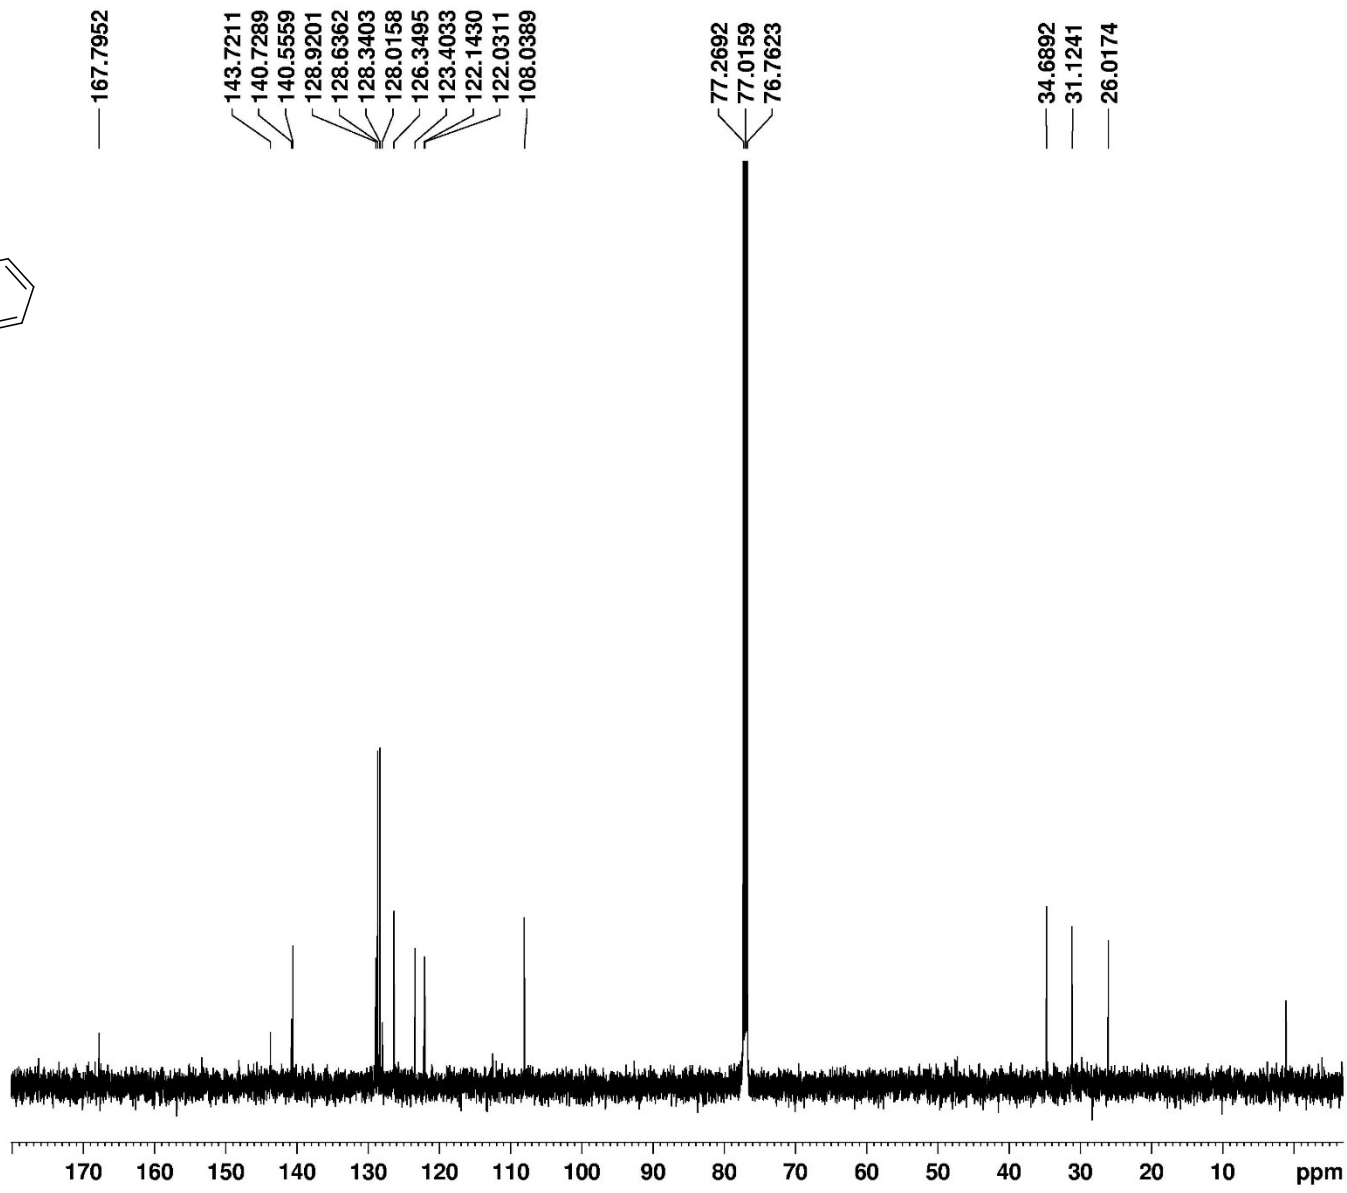

SLK-497  
 13C, CDC13

Current Data Parameters  
 NAME SLK-497  
 EXPNO 50  
 PROCNO 1

F2 - Acquisition Parameters  
 Date\_ 20170106  
 Time 19.16  
 INSTRUM spect  
 PROBHD 5 mm PATXI III/  
 PULPROG zgpg30  
 TD 65536  
 SOLVENT CDCl3  
 NS 2048  
 DS 4  
 SWH 29761.904 Hz  
 FIDRES 0.454131 Hz  
 AQ 1.1010048 sec  
 RG 38.43  
 DW 16.800 usec  
 DE 6.50 usec  
 TE 300.0 K  
 D1 2.0000000 sec  
 D11 0.0300000 sec  
 TDO 1

==== CHANNEL f1 ====  
 SFO1 125.9077573 MHz  
 NUC1 13C  
 P1 9.23 usec  
 PLW1 244.0000000 W

==== CHANNEL f2 ====  
 SFO2 500.6783527 MHz  
 NUC2 1H  
 CPDPRG2 waltz16  
 PCPD2 80.00 usec  
 PLW2 13.60000038 W  
 PLW12 0.08840500 W  
 PLW13 0.05657900 W

F2 - Processing parameters  
 SI 32768  
 SF 125.8951680 MHz  
 WDW EM  
 SSB 0  
 LB 1.00 Hz  
 GB 0  
 PC 1.40

<sup>13</sup>C -NMR Spectrum of **2k**

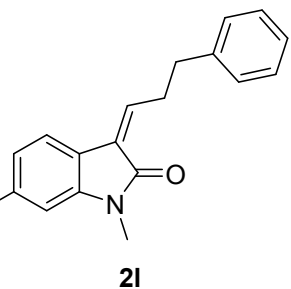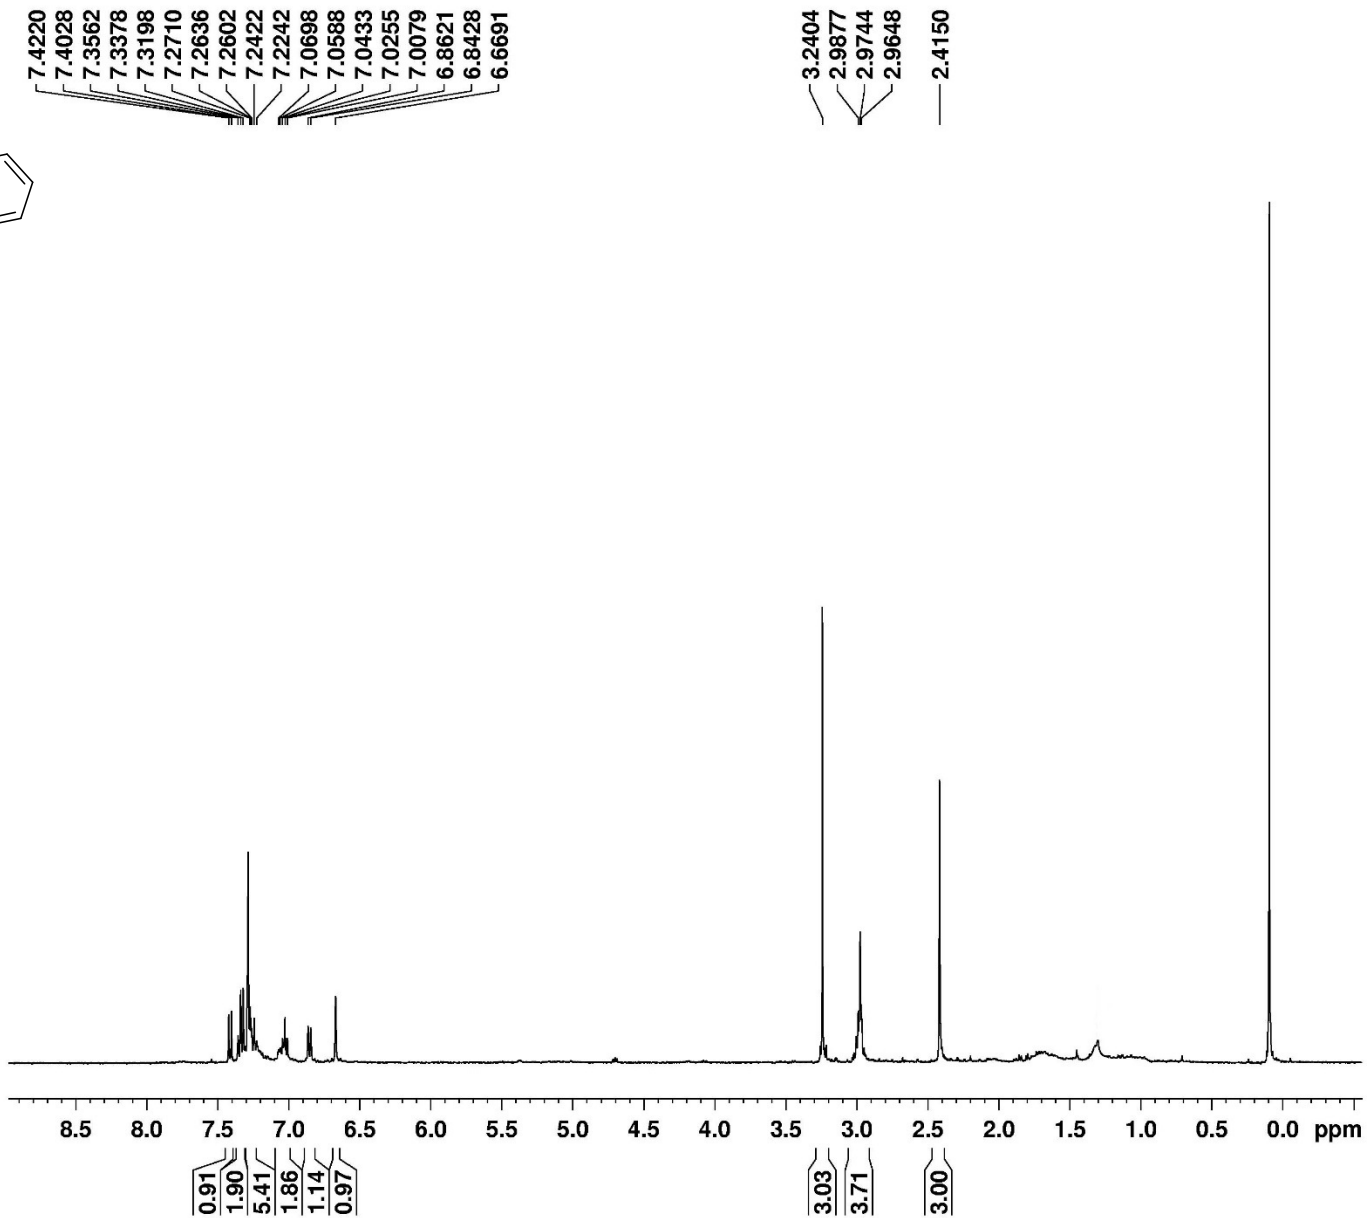

SLK-498,  
1H, CDCl<sub>3</sub>

Current Data Parameters  
NAME SLK-498F  
EXPNO 90  
PROCNO 1

F2 - Acquisition Parameters  
Date\_ 20170105  
Time 18.34  
INSTRUM spect  
PROBHD 5 mm PABBO BB/  
PULPROG zg30  
TD 65536  
SOLVENT CDCl<sub>3</sub>  
NS 8  
DS 0  
SWH 8012.820 Hz  
FIDRES 0.122266 Hz  
AQ 4.0894465 sec  
RG 159.22  
DW 62.400 usec  
DE 6.50 usec  
TE 295.5 K  
D1 1.00000000 sec  
TD0 1

===== CHANNEL f1 =====  
SFO1 400.1629712 MHz  
NUC1 1H  
P1 13.20 usec  
PLW1 13.00000000 W

F2 - Processing parameters  
SI 65536  
SF 400.1605000 MHz  
WDW EM  
SSB 0  
LB 0.30 Hz  
GB 0  
PC 1.00

<sup>1</sup>H -NMR Spectrum of **21**

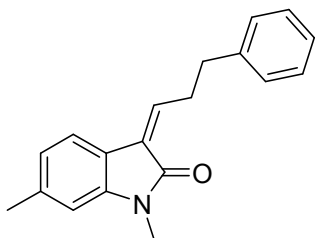

**21**

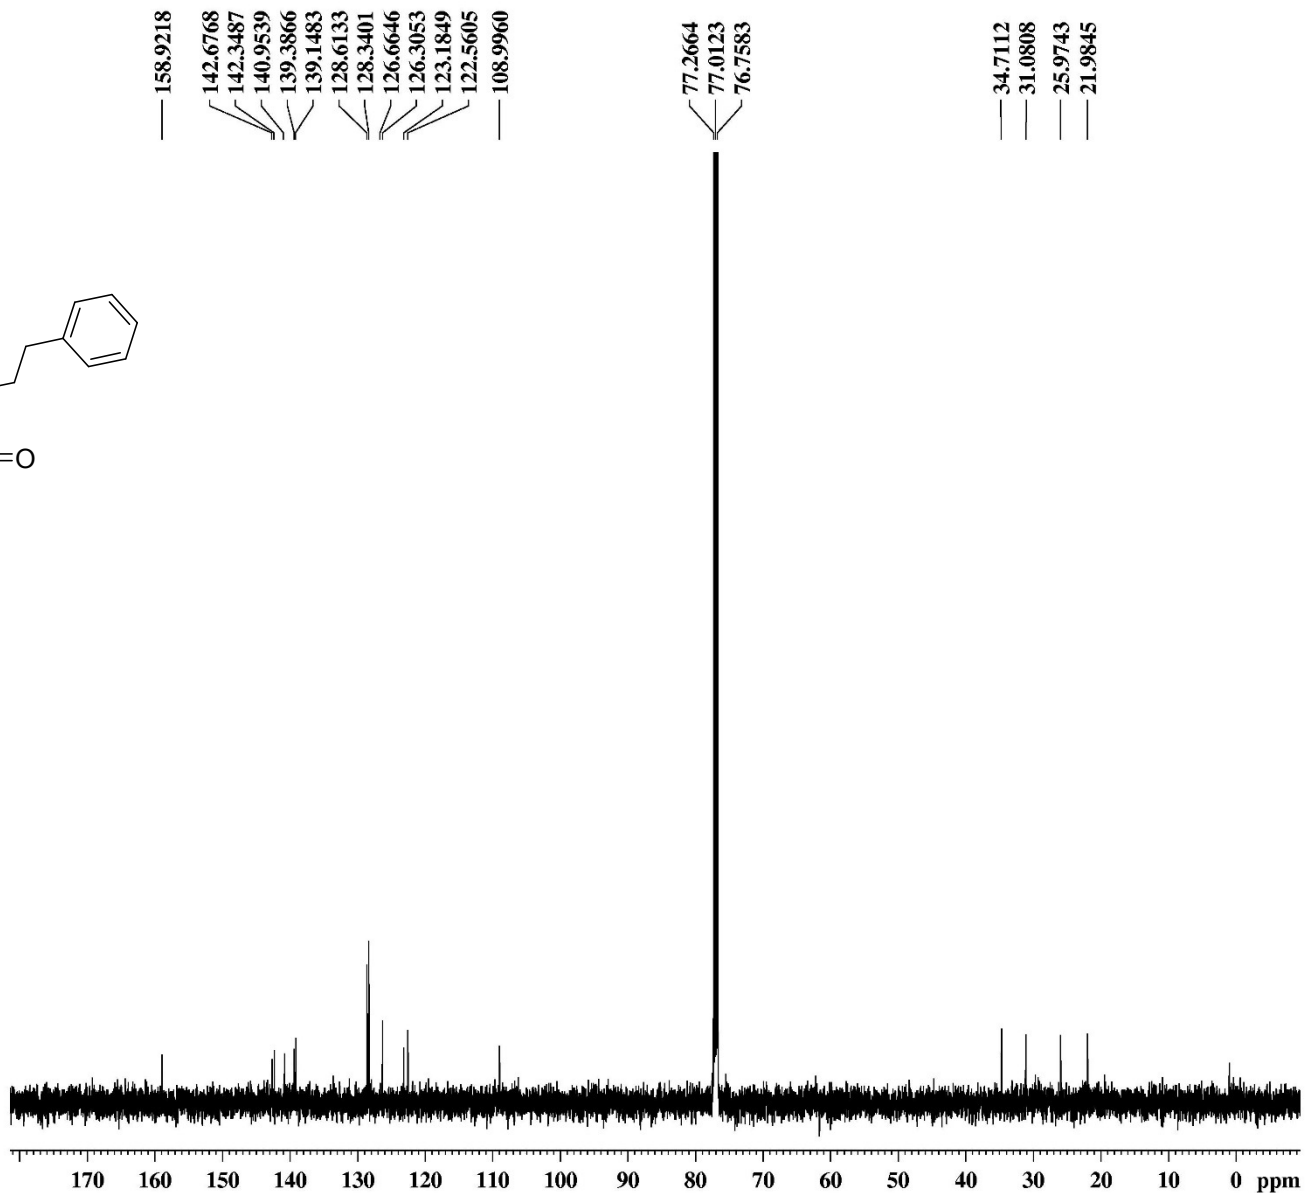

<sup>13</sup>C -NMR Spectrum of **21**

SLK-498  
13C, CDCl3

Current Data Parameters  
NAME SLK-498F  
EXPNO 60  
PROCNO 1

F2 - Acquisition Parameters  
Date\_ 20170106  
Time 21.09  
INSTRUM spect  
PROBHD 5 mm PATXI 1H/  
PULPROG zgpg30  
TD 65536  
SOLVENT CDCl3  
NS 2048  
DS 4  
SWH 29761.904 Hz  
FIDRES 0.454131 Hz  
AQ 1.1010048 sec  
RG 38.43  
DW 16.800 usec  
DE 6.50 usec  
TE 300.0 K  
D1 2.00000000 sec  
D11 0.03000000 sec  
TD0 1

===== CHANNEL f1 =====  
SF01 125.9077573 MHz  
NUC1 13C  
P1 9.23 usec  
PLW1 244.00000000 W

===== CHANNEL f2 =====  
SF02 500.6783527 MHz  
NUC2 1H  
PCPD2 waltz16  
PLW2 80.00 usec  
PLW12 13.60000038 W  
PLW13 0.08840500 W  
PLW13 0.05657900 W

F2 - Processing parameters  
SI 32768  
SF 125.8951680 MHz  
WDW EM  
SSB 0  
LB 1.00 Hz  
GB 0  
PC 1.40

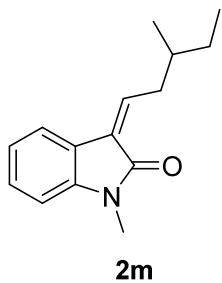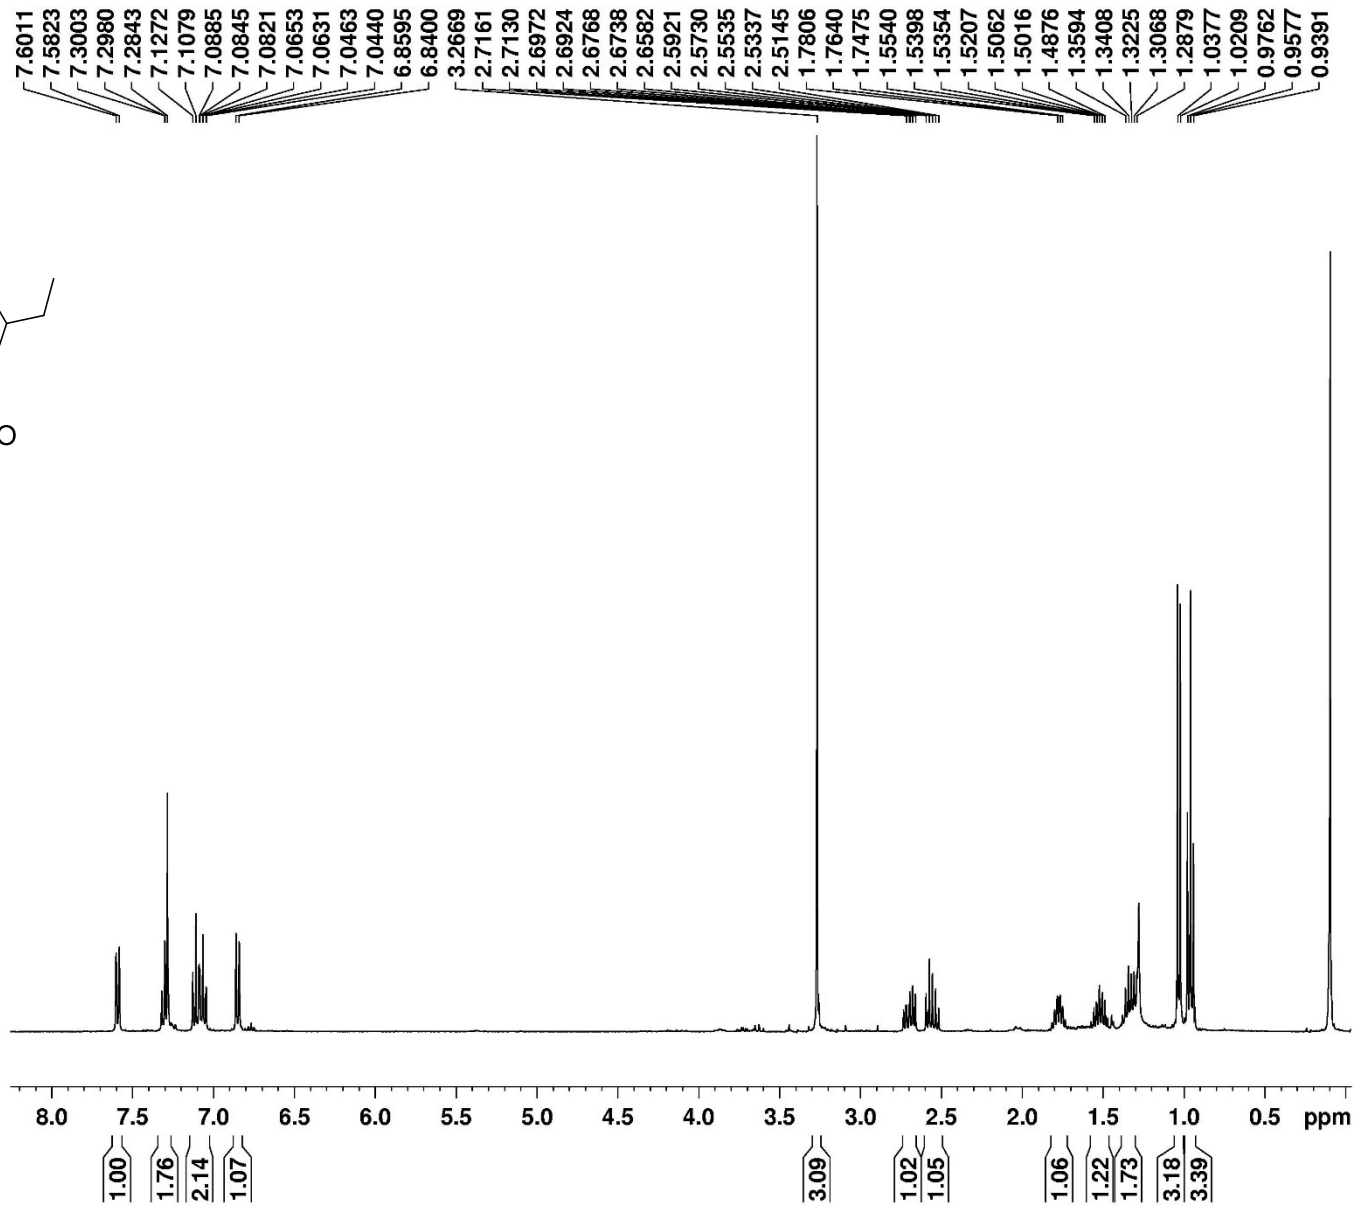

SM-77F  
1H, CDCl3

Current Data Parameters  
NAME SM-77F  
EXPNO 80  
PROCNO 1

F2 - Acquisition Parameters  
Date 20170106  
Time 16.05  
INSTRUM spect  
PROBHD 5 mm PABBO BB/  
PULPROG zg30  
TD 65536  
SOLVENT CDCl3  
NS 8  
DS 0  
SWH 8012.820 Hz  
FIDRES 0.122266 Hz  
AQ 4.089465 sec  
RG 114.26  
DW 62.400 usec  
DE 6.50 usec  
TE 295.6 K  
D1 1.00000000 sec  
TD0 1

==== CHANNEL f1 ====  
SFO1 400.1629712 MHz  
NUC1 1H  
P1 13.20 usec  
PLW1 13.00000000 W

F2 - Processing parameters  
SI 65536  
SF 400.1605000 MHz  
WDW EM  
SSB 0  
LB 0.30 Hz  
GB 0  
PC 1.00

<sup>1</sup>H -NMR Spectrum of **2m**

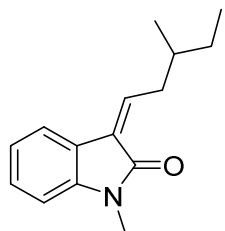

2m

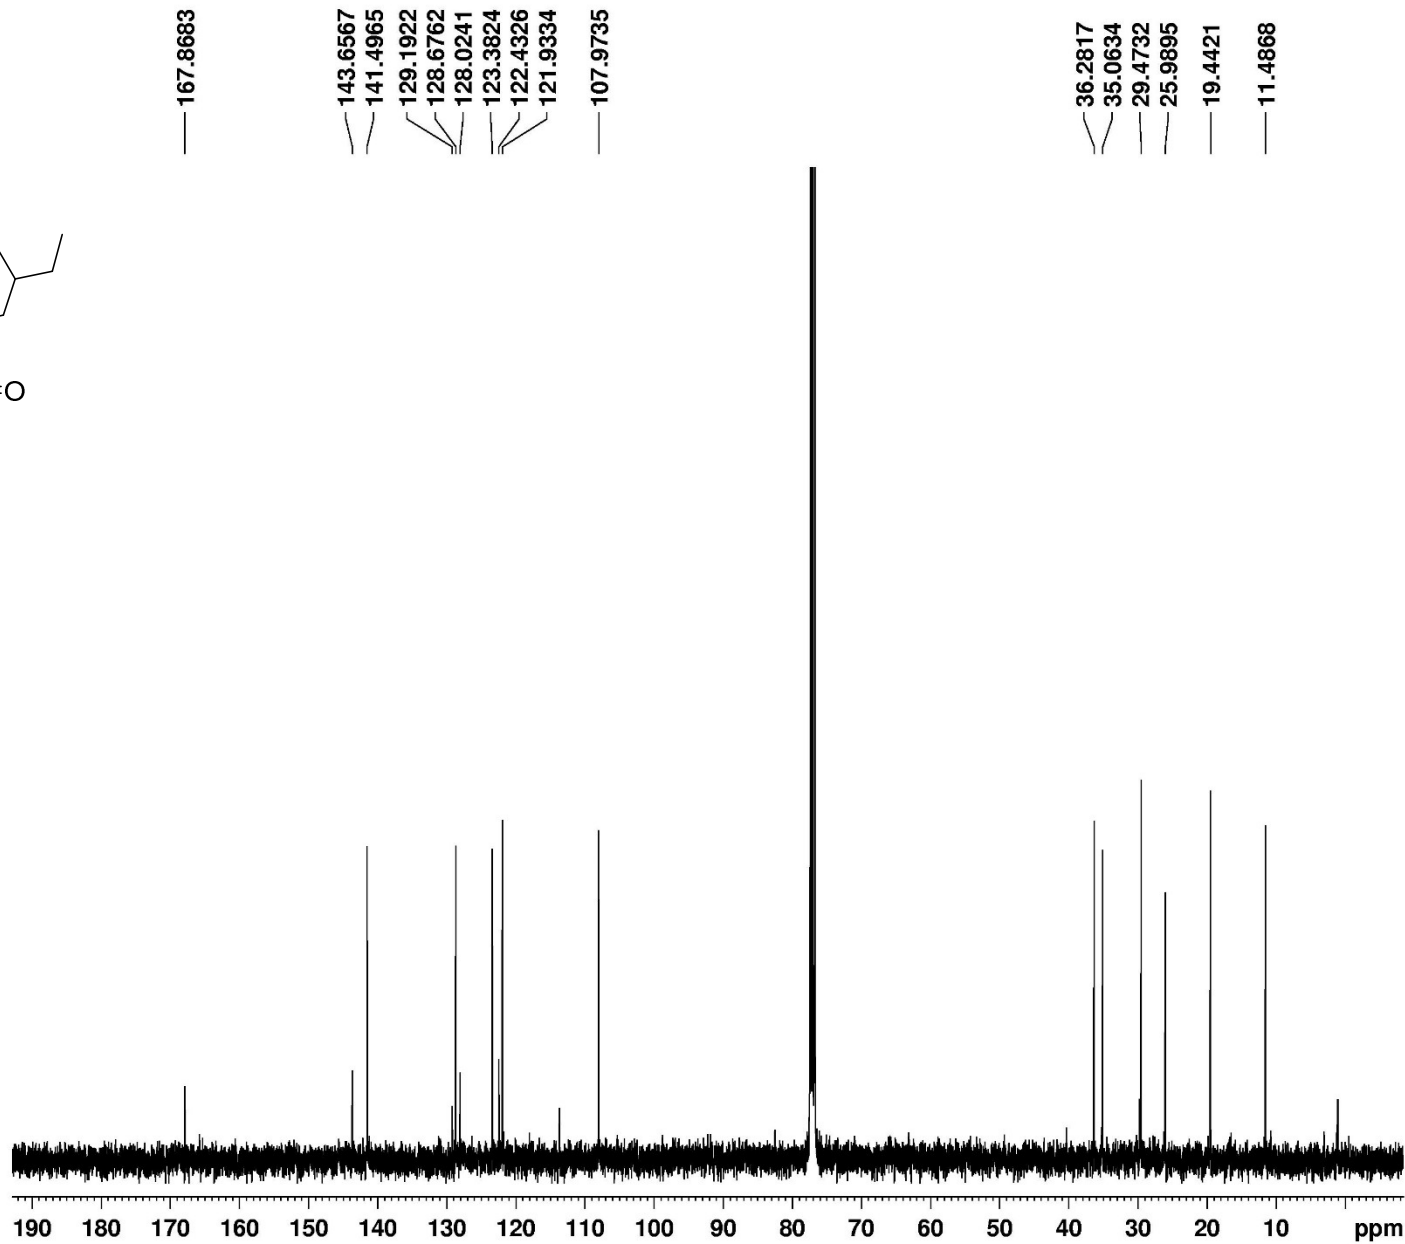

<sup>13</sup>C -NMR Spectrum of 2m

SLK-77F  
13C, CDCl<sub>3</sub>

Current Data Parameters  
NAME 13C  
EXPNO 80  
PROCNO 1

F2 - Acquisition Parameters  
Date\_ 20170110  
Time 4.16  
INSTRUM spect  
PROBHD 5 mm PABBO BB/  
PULPROG zgpg30  
TD 65536  
SOLVENT CDCl<sub>3</sub>  
NS 512  
DS 0  
SWH 24038.461 Hz  
FIDRES 0.366798 Hz  
AQ 1.3631488 sec  
RG 201.48  
DW 20.800 usec  
DE 6.50 usec  
TE 300.0 K  
D1 2.0000000 sec  
D11 0.0300000 sec  
TD0 1

==== CHANNEL f1 ====  
SFO1 100.6304993 MHz  
NUC1 13C  
P1 9.90 usec  
PLW1 53.0000000 W

==== CHANNEL f2 ====  
SFO2 400.1621006 MHz  
NUC2 1H  
CPDPRG2 waltz16  
PCPD2 90.00 usec  
PLW2 13.0000000 W  
PLW12 0.27963999 W  
PLW13 0.22651000 W

F2 - Processing parameters  
SI 32768  
SF 100.6204380 MHz  
WDW EM  
SSB 0  
LB 1.00 Hz  
GB 0  
PC 1.40

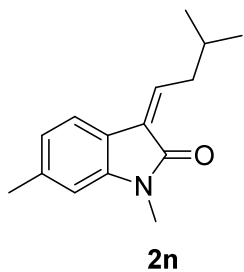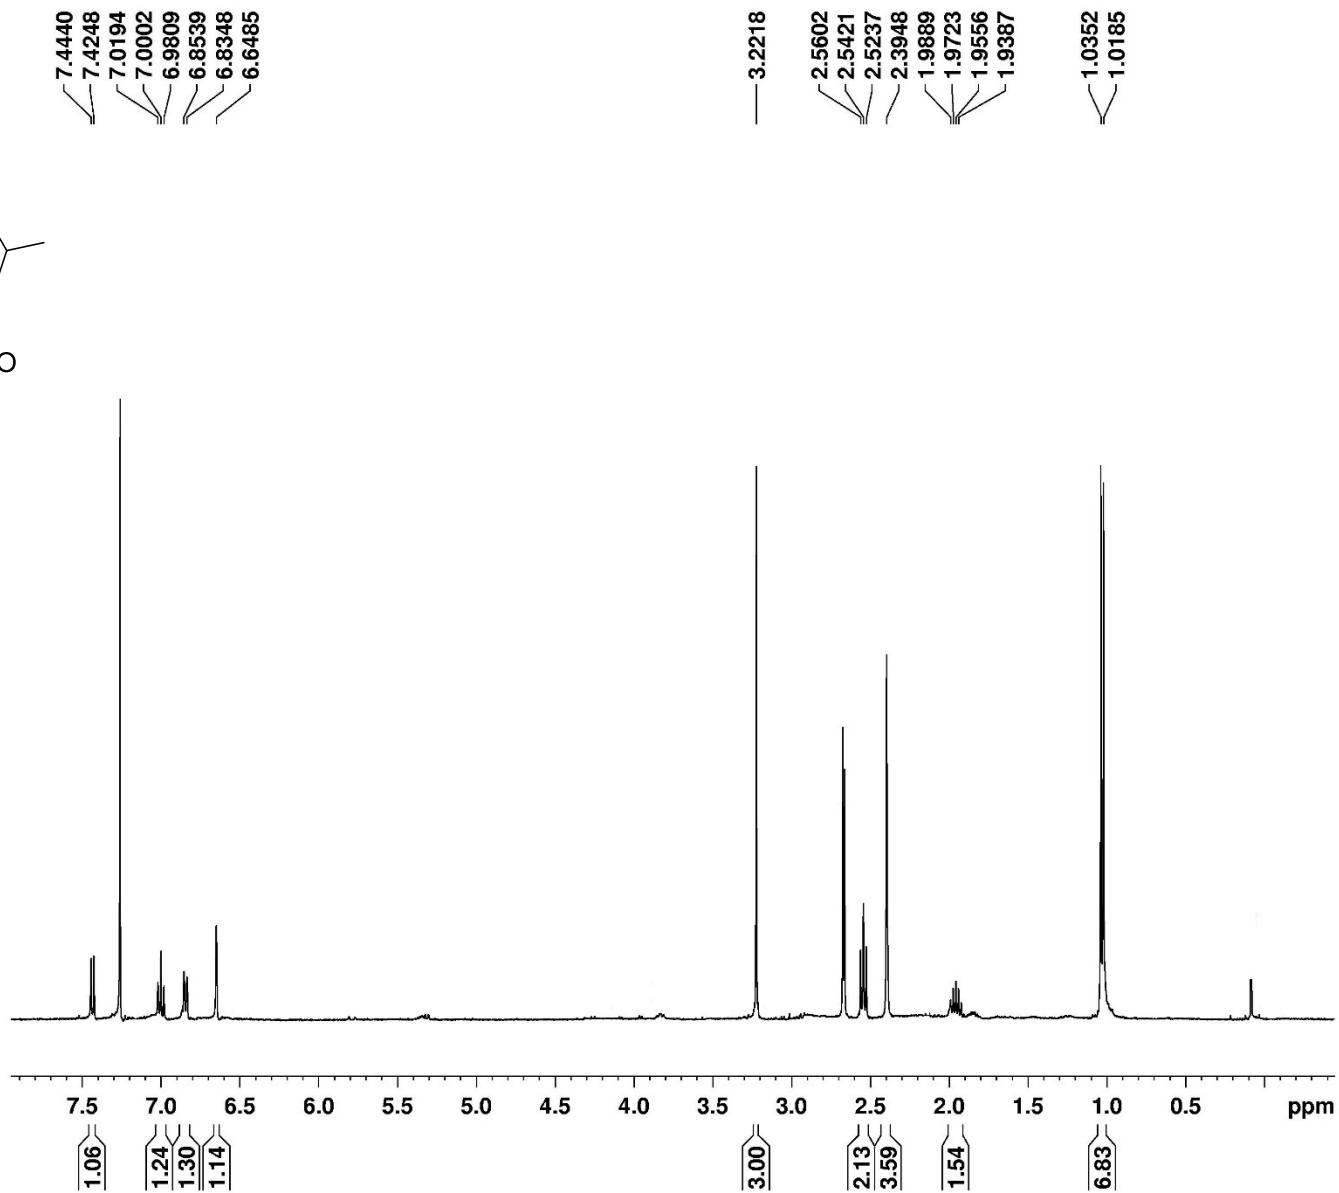

SM 80 F  
1H, CDCl<sub>3</sub>

Current Data Parameters  
NAME SM-80F  
EXPNO 200  
PROCNO 1

F2 - Acquisition Parameters  
Date\_ 20170109  
Time 18.26  
INSTRUM spect  
PROBHD 5 mm PABBO BB/  
PULPROG zg30  
TD 65536  
SOLVENT CDCl<sub>3</sub>  
NS 8  
DS 0  
SWH 9615.385 Hz  
FIDRES 0.146719 Hz  
AQ 3.4078720 sec  
RG 129.57  
DW 52.000 usec  
DE 6.50 usec  
TE 295.6 K  
D1 1.00000000 sec  
TD0 1

===== CHANNEL f1 =====  
SFO1 400.1629712 MHz  
NUC1 1H  
P1 13.20 usec  
PLW1 13.00000000 W

F2 - Processing parameters  
SI 65536  
SF 400.1605099 MHz  
WDW EM  
SSB 0  
LB 0.30 Hz  
GB 0  
PC 1.00

<sup>1</sup>H -NMR Spectrum of **2n**

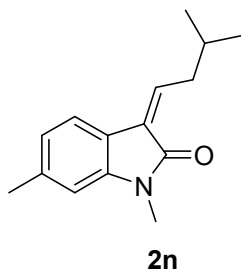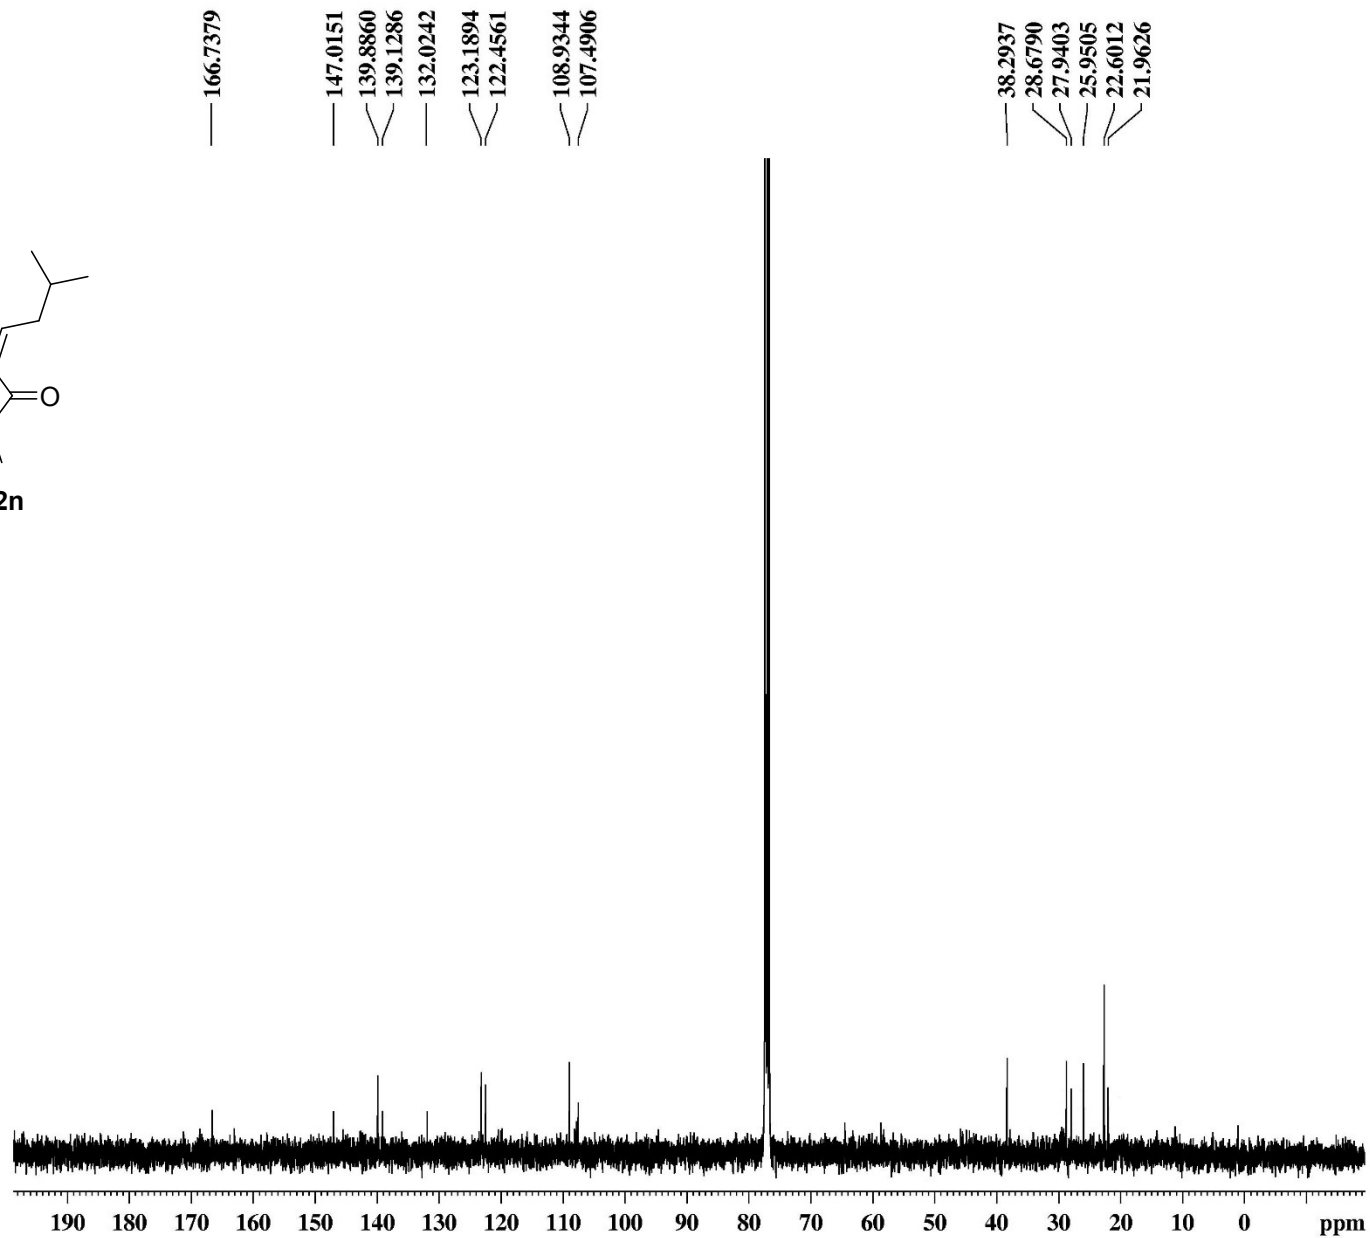

$^{13}\text{C}$  -NMR Spectrum of **2n**

SLK-80F  
13C, CDCl<sub>3</sub>

Current Data Parameters  
NAME SM-801T  
EXPNO 120  
PROCNO 1

F2 - Acquisition Parameters  
Date 20170110  
Time 22.35  
INSTRUM spect  
PROBHD 5 mm PABBO BB/  
PULPROG zgpg30  
TD 65536  
SOLVENT CDCl<sub>3</sub>  
NS 1024  
DS 0  
SWH 24038.461 Hz  
FIDRES 0.366798 Hz  
AQ 1.3631488 sec  
RG 201.48  
DW 20.800 usec  
DE 6.50 usec  
TE 300.0 K  
D1 2.0000000 sec  
D11 0.03000000 sec  
TD0 1

==== CHANNEL f1 =====  
SFO1 100.6304993 MHz  
NUC1 13C  
P1 9.90 usec  
PLW1 53.00000000 W

==== CHANNEL f2 =====  
SFO2 400.1621006 MHz  
NUC2 1H  
CPDPRG[2] waltz16  
PCPD2 90.00 usec  
PLW2 13.00000000 W  
PLW12 0.27963999 W  
PLW13 0.22651000 W

F2 - Processing parameters  
SI 32768  
SF 100.6204380 MHz  
WDW EM  
SSB 0  
LB 1.00 Hz  
GB 0  
PC 1.40
